# Supplementary material for: MEK inhibition remodels the active chromatin landscape and induces SOX10 genomic recruitment in BRAF(V600E) mutant melanoma cells
Source: Epigenetics Chromatin. 2019 Aug 9;12:50. doi: 10.1186/s13072-019-0297-2 (PMC6688322; doi:10.1186/s13072-019-0297-2)
Supplement: Supplementary file 2 — Additional file 2: Table S1. Genes exhibiting significantly different expression changes in 501mel cells in response to AZD6244 treatment. Table S2. The 250 pigmentation genes with differential expression in 501mel cells under AZD6244 treatment. Genes associated with H3K27ac loss or gain regions by GREAT analysis, or with SOX10 binding sites under AZD6244 are also indicated. Table S3. Top 5 significantly enriched transcription factor motifs identified by de novo motif enrichment analysis of genomic regions that were losing or gaining H3K27ac in 501mel cells in response to AZD6244 treatment. Table S4. The 799 super-enhancers identified in 501mel cells treated with DMSO only, and the 583 super-enhancers identified in 501mel cells treated with AZD6244. Table S5. Top enriched biological processes from GO analyses of 1080 genes associated with super-enhancers in control (DMSO-treated) 501mel cells. Table S6. Super-enhancer-associated pigmentation genes with significant expression changes following AZD6244 treatment. Table S7. GWAS loci associated with pigmentation and/or melanoma phenotypes that overlap with H3K27ac regions and/or with SOX10 binding sites. [file 13072_2019_297_MOESM2_ESM.xlsx]

## Sheet: Table S1
Table S1. Genes exhibiting significantly different expression changes in 501mel cells under AZD6244 treatment.
Gene Symbol	Base Mean	log2 Fold Change	P-value	FDR adjusted p-value
SPRR2D	233.777	-6.38681	2.7885e-84	1.09844e-81
SHISA2	2029.99	-5.47371	0	0
VGF	222.644	-5.47096	1.449e-74	4.14102e-72
CSTA	148.178	-5.19842	3.48517e-64	8.19296e-62
ETV4	266.399	-5.1146	2.72289e-94	1.32287e-91
GDF15	1874.78	-5.10833	0	0
ASNS	9801.48	-4.69933	2.02733e-260	7.38708e-257
EGR1	155.282	-4.29856	5.23735e-64	1.21166e-61
FMN2	7074.88	-4.10068	0	0
C15orf54	118.499	-4.0603	9.649e-48	1.32674e-45
CTLA4	753.369	-3.74435	1.16643e-142	1.54553e-139
RNASE1	146.037	-3.65748	4.81328e-50	7.30766e-48
NUPR1	203.937	-3.64462	6.77426e-20	2.1325e-18
TSPAN19	905.105	-3.63124	1.02011e-78	3.45768e-76
LOC152225	691.24	-3.49346	2.7275e-140	3.31277e-137
HTN1	1324.82	-3.44144	6.82505e-24	2.83405e-22
HTR1F	144.11	-3.39095	6.81118e-45	8.70815e-43
C1QTNF3	688.115	-3.32732	7.18153e-95	3.60934e-92
RLBP1	150.756	-3.26453	1.27073e-47	1.73092e-45
MIA	116.437	-3.17393	2.36272e-35	2.06207e-33
MGP	13674.5	-3.13144	3.10112e-215	7.53313e-212
TRIB3	1283	-3.11139	1.10034e-156	1.60375e-153
RNASE6	19.0634	-3.04721	6.02918e-14	1.13534e-12
LINC01366	87.4808	-3.04196	2.24129e-27	1.20988e-25
MUC19	108.61	-3.0326	4.56831e-35	3.91666e-33
SPRY4	318.286	-3.01754	2.85914e-71	7.18483e-69
LCP1	104.059	-3.01435	5.41841e-35	4.61832e-33
S100A16	140.873	-2.98333	3.98846e-41	4.50634e-39
ATP8A2	28.2454	-2.96857	1.17106e-15	2.55512e-14
DDIT4	571.349	-2.9307	3.95887e-71	9.77976e-69
CD96	29.3052	-2.91516	8.77533e-15	1.79888e-13
LOC100507065	65.5827	-2.88981	6.4222e-23	2.52982e-21
RIMS3	52.8257	-2.86978	3.13199e-20	1.00107e-18
MTHFD2	11241.9	-2.82467	5.15892e-228	1.50383e-224
AKNA	95.4155	-2.80308	1.37e-21	4.85049e-20
LINC00326	21.0866	-2.78745	1.23548e-12	2.03701e-11
TM4SF1	76.6395	-2.7692	2.99715e-25	1.41829e-23
PMAIP1	804.856	-2.76372	7.38977e-123	7.18039e-120
TNFSF15	26.1821	-2.72744	6.05765e-13	1.03627e-11
CPB2-AS1	691.028	-2.71799	7.03889e-83	2.63056e-80
TNFSF13B	350.158	-2.69854	1.03453e-62	2.21739e-60
NOX4	4657.17	-2.68917	6.28266e-168	1.01744e-164
ISG20	605.06	-2.67191	3.42338e-74	9.41429e-72
RCAN1	5622.43	-2.66897	3.25011e-178	5.92129e-175
SLMO2-ATP5E	800.035	-2.66555	6.0843e-11	8.14313e-10
PPP1R14C	51.3558	-2.65839	1.77328e-17	4.61529e-16
DUSP6	2464.24	-2.65147	3.42123e-101	1.99458e-98
PCK2	330.518	-2.64926	8.32076e-63	1.81008e-60
SESN2	141.031	-2.61853	3.38516e-29	2.13587e-27
LINC00239	26.9484	-2.6087	6.82814e-12	1.0281e-10
SH2D1A	61.3703	-2.57157	2.70781e-19	8.12064e-18
OAS1	34.078	-2.56742	8.21594e-14	1.52157e-12
CHAC1	182.528	-2.56408	1.49727e-34	1.26143e-32
MYEOV	13.2933	-2.56306	6.68768e-10	7.91176e-09
ARHGEF2	402.739	-2.56241	2.26211e-54	3.92502e-52
TRIM51	94.1961	-2.55721	5.22553e-25	2.41785e-23
KLRC3	24.6385	-2.55256	1.30504e-11	1.90209e-10
CPXM1	446.842	-2.55183	3.38573e-51	5.3638e-49
OR51B5	425.024	-2.53883	8.44873e-74	2.28038e-71
CPB2	195.823	-2.51871	6.66951e-39	7.04407e-37
TDO2	60.5118	-2.51426	7.38094e-18	1.95951e-16
SH2B3	1752.39	-2.50974	4.49102e-83	1.72254e-80
LOC101927040	18.308	-2.50096	2.76182e-10	3.44047e-09
PCLO	309.654	-2.48587	2.44883e-56	4.57586e-54
CXCL8	94.0822	-2.47945	5.49647e-25	2.51132e-23
ERP27	155.283	-2.46852	2.9115e-34	2.41109e-32
SLAMF9	14.5198	-2.43428	2.94308e-09	3.20115e-08
FABP7	3403.96	-2.42065	4.74634e-119	4.06929e-116
CCDC147	14.6017	-2.41655	4.11436e-09	4.38675e-08
SKAP1	11.6266	-2.39843	9.41024e-09	9.53122e-08
MAFF	347.383	-2.39835	1.71763e-53	2.91099e-51
HTN3	14.9555	-2.39782	3.98481e-09	4.25484e-08
IFI44	185.328	-2.39756	4.15727e-33	3.20594e-31
CD22	28.2583	-2.36808	2.38059e-11	3.38839e-10
RASGRP1	194.779	-2.36521	1.27645e-33	1.01662e-31
PTPRR	55.3766	-2.3482	3.81281e-15	7.97298e-14
MUC7	77.2514	-2.32179	1.69909e-20	5.57752e-19
ARHGDIB	48.5029	-2.31985	4.93582e-13	8.51355e-12
LINC01212	37.7883	-2.31308	1.94487e-12	3.13102e-11
FAM105A	57.5822	-2.31127	4.84824e-16	1.09048e-14
CNIH3	29.1506	-2.3103	3.91117e-11	5.37279e-10
MAP2	1511.65	-2.30835	6.06111e-114	4.90782e-111
PHLDA2	65.4415	-2.30178	8.01862e-18	2.12493e-16
SLC7A11	6342.2	-2.26808	1.18958e-113	9.12532e-111
CTH	1883.43	-2.26685	5.50971e-123	5.736e-120
HEY1	3023.08	-2.26249	6.49373e-104	4.11505e-101
LOC101927482	220.413	-2.25627	4.04583e-37	3.87947e-35
PEG10	2308.37	-2.2473	2.36351e-90	1.01318e-87
SLC1A5	440.508	-2.23418	3.28442e-51	5.26049e-49
FXYD3	72.0925	-2.2181	3.19679e-18	8.7417e-17
DLGAP1-AS2	124.117	-2.21449	1.06544e-25	5.19356e-24
RSL24D1	34682.9	-2.20074	4.9458e-89	2.05957e-86
CCDC110	133.863	-2.1904	7.51717e-27	3.8852e-25
ST8SIA1	373.853	-2.18479	6.08527e-50	9.05029e-48
ISG15	356.62	-2.16731	4.32312e-38	4.46876e-36
TM4SF19-TCTEX1D2	1478.9	-2.16547	3.59549e-66	8.59086e-64
OTOGL	152.617	-2.16521	1.46125e-25	7.07564e-24
TMEM163	184.95	-2.14179	3.34604e-29	2.12037e-27
CALCRL	65.4386	-2.14172	1.3167e-15	2.8389e-14
CREB5	982.245	-2.13668	3.04036e-73	7.91308e-71
GARS	8117.26	-2.13236	2.66093e-81	9.45927e-79
FAM84B	5875.75	-2.12981	9.98466e-64	2.27385e-61
ST3GAL6	27447	-2.12672	5.47695e-135	6.14051e-132
PXK	1770.81	-2.11981	1.30682e-96	6.80246e-94
ZNF560	43.2172	-2.11267	5.5474e-12	8.43981e-11
CCDC147-AS1	226.362	-2.10905	4.60816e-34	3.75218e-32
ACSL5	74.7159	-2.10375	3.91981e-17	9.78274e-16
ZNF204P	109.502	-2.09948	2.48035e-17	6.32013e-16
TXNIP	2624.17	-2.08877	3.3562e-101	1.99458e-98
SLC5A9	50.7461	-2.08798	2.17428e-12	3.47099e-11
TMEM71	22.7174	-2.08153	7.91926e-08	7.11172e-07
PLAC1	28.9034	-2.05451	6.94199e-09	7.16061e-08
LOC283177	37.4243	-2.04809	2.43567e-10	3.05245e-09
BFSP1	118.68	-2.02359	1.90814e-18	5.33802e-17
DLGAP1-AS1	330.495	-2.02062	5.3958e-33	4.09603e-31
TIMP1	330.633	-2.01645	7.17378e-37	6.78947e-35
EGR2	94.0105	-2.01328	5.79678e-18	1.56459e-16
CNPY1	453.82	-2.01073	3.92323e-29	2.4647e-27
COL25A1	225.144	-2.00962	9.7294e-34	7.79154e-32
TRIM48	9662.32	-2.00729	5.18652e-49	7.41113e-47
PHGDH	2577.54	-2.00476	6.37598e-71	1.54883e-68
MST4	392.656	-1.9925	8.419e-36	7.52803e-34
TSC22D3	38.7944	-1.97956	4.13753e-10	5.03376e-09
ATF3	203.056	-1.97867	6.94093e-22	2.49173e-20
LOC100507194	594.292	-1.96887	7.39234e-56	1.33016e-53
ICA1	24.2144	-1.95473	1.0014e-07	8.84408e-07
LOC102723631	40.1775	-1.92684	2.20999e-08	2.13033e-07
ARHGAP18	1550.84	-1.92238	1.68261e-78	5.44978e-76
CPN1	19.2705	-1.91597	4.83273e-07	3.87869e-06
SLC4A5	710.684	-1.91533	7.68208e-48	1.06635e-45
LOC729970	122.108	-1.91501	2.16727e-20	7.05088e-19
ETV5	3746.09	-1.91018	3.74782e-77	1.16222e-74
ATP6V0D2	18.553	-1.90825	6.78497e-07	5.30815e-06
ZC3H13	1576.21	-1.90455	2.26623e-26	1.14689e-24
OPN5	1439.65	-1.90297	2.34944e-58	4.82297e-56
APOC1	427.858	-1.90214	6.25278e-33	4.72198e-31
FREM2	75.7969	-1.89853	1.00166e-14	2.03899e-13
RHD	18.2361	-1.89799	7.06353e-07	5.49658e-06
DDX60	279.547	-1.89503	1.87972e-30	1.29843e-28
LOC102724484	53.0809	-1.8912	7.6733e-11	1.01028e-09
MCTP1	638.146	-1.88448	1.21612e-45	1.59685e-43
LY96	43.9152	-1.87756	3.82739e-09	4.09877e-08
ATF4	10160.4	-1.87367	2.37793e-61	5.02295e-59
CYFIP2	44.5782	-1.87337	1.01042e-09	1.17159e-08
CARS	989.32	-1.87264	7.3743e-57	1.43307e-54
PTPRZ1	901.62	-1.85538	5.18149e-58	1.04889e-55
PPP1R1C	19.0023	-1.84803	1.42254e-06	1.04556e-05
FAM175A	982.603	-1.84039	8.8451e-56	1.57216e-53
LINC00977	22.1543	-1.83884	4.66081e-07	3.74897e-06
CHL1	3895.09	-1.83698	2.52025e-75	7.34652e-73
APOD	5813.98	-1.83307	1.47408e-78	4.88288e-76
SLIT1	115.415	-1.832	1.35498e-12	2.21811e-11
JDP2	9.54876	-1.83119	1.18044e-05	7.22894e-05
MOCOS	40.9354	-1.83057	5.07958e-09	5.35321e-08
MME	6272.36	-1.82878	1.05913e-105	7.35085e-103
CNDP1	365.63	-1.82308	2.53122e-39	2.73278e-37
PCED1B	24.0786	-1.81865	3.01529e-07	2.48433e-06
LINC00882	101.433	-1.81235	8.47797e-14	1.56413e-12
HOXB9	106.148	-1.8075	2.11346e-13	3.76113e-12
ARSG	211.384	-1.80711	9.57046e-25	4.29198e-23
OR51B4	14.539	-1.80589	7.46939e-06	4.75957e-05
LOC100130476	188.75	-1.80088	2.40529e-24	1.04962e-22
AGPAT9	97.3078	-1.79772	7.51119e-15	1.54845e-13
EVI2A	29.4528	-1.79384	1.9351e-07	1.64264e-06
ANKRD36	788.083	-1.79286	7.4158e-51	1.13774e-48
EIF4EBP1	1163.5	-1.79089	2.32019e-41	2.66274e-39
SNTB1	402.143	-1.78873	1.11013e-36	1.04388e-34
STON2	202.99	-1.78592	1.27424e-22	4.8618e-21
LPL	28.2105	-1.78089	3.90735e-07	3.16495e-06
RND3	203.608	-1.78054	4.49367e-25	2.09921e-23
DPP4	18.395	-1.76994	3.82961e-06	2.57752e-05
SARS	6775.95	-1.76667	1.64744e-77	5.21987e-75
COL19A1	529.673	-1.76423	2.19935e-41	2.54409e-39
PPP1R9A	101.796	-1.76091	7.68671e-16	1.70006e-14
C2orf80	8.45792	-1.7544	2.96398e-05	0.000165771
DDIT3	2834.37	-1.74736	3.63704e-46	4.86329e-44
HPCAL4	43.5869	-1.74658	4.04526e-08	3.77221e-07
BRE-AS1	9.15529	-1.74064	3.2554e-05	0.000180281
CXCL9	10.5268	-1.73149	3.04346e-05	0.000169956
KLF10	1066.36	-1.73134	3.9616e-56	7.3089e-54
LRGUK	593.898	-1.73056	3.11062e-43	3.80985e-41
BST2	8.51114	-1.73002	3.8036e-05	0.000206548
TMC8	23.9631	-1.72593	3.05045e-06	2.0952e-05
GAS2L3	461.621	-1.71846	1.06286e-20	3.5612e-19
FYB	70.9265	-1.71656	1.16076e-11	1.70545e-10
TMCC1-AS1	299.673	-1.71572	3.57564e-24	1.54186e-22
EPHA7	66.6097	-1.70877	1.62594e-09	1.83705e-08
PLCL1	236.605	-1.70464	3.3228e-27	1.74837e-25
ICOS	29.5378	-1.70297	1.39629e-06	1.02835e-05
IL1RAPL1	7.42363	-1.70038	5.14858e-05	0.000270905
DDX58	172.53	-1.69082	3.99935e-21	1.37154e-19
RFX3	1133.93	-1.67773	2.77255e-45	3.57609e-43
LOC642236	160.568	-1.67634	1.40614e-18	3.9718e-17
SV2A	31.6276	-1.67337	2.78225e-07	2.30667e-06
ECM1	604.035	-1.67086	9.45787e-32	6.85813e-30
TGM5	7.82457	-1.66961	7.09181e-05	0.000360905
CCND1	2187.37	-1.65967	3.00374e-27	1.59779e-25
CREM	34693.9	-1.65845	9.01175e-80	3.12729e-77
UCN2	12.0586	-1.65824	4.60192e-05	0.00024426
STC1	134.155	-1.65659	2.0422e-16	4.77004e-15
FLJ46906	295.356	-1.65514	5.28028e-25	2.43545e-23
DAZ3	3089.63	-1.65003	5.51534e-07	4.3864e-06
SLC5A4	920.329	-1.6452	3.13246e-19	9.31748e-18
RNF125	206.03	-1.64167	1.62282e-22	6.12761e-21
LINC00589	832.01	-1.63961	8.61257e-28	4.75485e-26
GNG12-AS1	24.5205	-1.63922	6.7817e-06	4.3505e-05
OLAH	6.96073	-1.63765	9.50278e-05	0.000470939
SLC22A18AS	25.6365	-1.63437	2.97504e-06	2.05212e-05
PIBF1	2122.54	-1.63233	4.42305e-51	6.85809e-49
LOC440700	128.797	-1.62631	9.07722e-17	2.18678e-15
DUSP4	1040.89	-1.62596	2.58736e-33	2.0495e-31
ABCB1	709.036	-1.62203	1.31167e-39	1.43741e-37
SLCO4A1	72.104	-1.6215	1.51707e-10	1.9328e-09
LOC100506457	21.2048	-1.61614	1.12701e-05	6.92793e-05
KLRC2	5.33159	-1.61401	9.20384e-05	0.000457524
CEBPB	252.706	-1.61253	2.83646e-16	6.53103e-15
ITGA2	126.429	-1.61249	1.81495e-11	2.61134e-10
IER3	532.988	-1.61043	4.0461e-24	1.7143e-22
PARP9	552.676	-1.59063	5.84334e-38	5.99765e-36
SHMT2	1696.41	-1.58581	3.26811e-55	5.73887e-53
TIGD4	73.5361	-1.58448	5.96148e-08	5.42715e-07
BMP6	26.9339	-1.58445	5.11568e-06	3.37075e-05
SPRY1	983.274	-1.58392	2.10569e-37	2.08779e-35
BRCA2	403.157	-1.57768	6.24352e-18	1.67278e-16
RDM1	91.1871	-1.57585	5.9242e-12	8.98493e-11
TMSB4X	754.098	-1.57401	1.12082e-35	9.84094e-34
KYNU	26.7304	-1.57232	4.53503e-06	3.01955e-05
MAML3	92.0372	-1.56955	5.49732e-12	8.37235e-11
RAPGEF5	155.681	-1.56838	2.75503e-17	6.99557e-16
TOR3A	101.049	-1.56184	3.83563e-12	5.96631e-11
INPP5F	1224.83	-1.56035	2.38493e-56	4.51434e-54
ITPRIP	442.306	-1.5578	7.34209e-28	4.13169e-26
ROR1-AS1	15.7851	-1.55678	5.83622e-05	0.000303363
SLC26A4	1117.01	-1.55662	2.50315e-37	2.43223e-35
KCNG1	8.56003	-1.55634	0.000212361	0.000973628
YPEL4	25.982	-1.55626	8.3893e-06	5.30013e-05
IRF7	22.4309	-1.54358	1.4757e-05	8.8694e-05
MRO	84.8915	-1.54256	1.39035e-10	1.77914e-09
TMEM27	25.0919	-1.54016	1.66012e-05	9.8559e-05
LOC344887	25.8634	-1.53927	1.66979e-05	9.90927e-05
FKBP9P1	59.1197	-1.53918	5.13199e-08	4.71917e-07
ZNF141	12.3927	-1.53577	0.000154544	0.000731322
ATP6V1E2	117.993	-1.53061	2.57722e-11	3.66111e-10
SPATA12	31.54	-1.52922	3.51042e-06	2.37422e-05
MANSC1	5.65183	-1.52336	0.000243167	0.00109999
CPNE5	25.1816	-1.52292	2.41862e-05	0.000138295
SCML4	106.059	-1.51841	1.09298e-11	1.61074e-10
DNAH14	1382.6	-1.51693	3.92612e-42	4.69043e-40
CEP170P1	21.0725	-1.51461	6.46602e-05	0.000332659
YARS	2000.01	-1.51406	6.48596e-43	7.87774e-41
ALCAM	96.1036	-1.50697	7.32144e-11	9.70091e-10
CASC11	6.18702	-1.50669	0.000314904	0.00138872
DLEU1	1696.49	-1.50605	2.79768e-49	4.03724e-47
YBX3	1867.31	-1.5017	4.22026e-24	1.77776e-22
TRIM34	55.9873	-1.50098	7.08613e-08	6.39507e-07
FCGR2A	448.73	-1.49927	4.72091e-33	3.60247e-31
LDB3	921.742	-1.49652	2.91902e-39	3.10545e-37
LOC101927322	12.9991	-1.49559	0.000205935	0.000945951
LOC100505592	6290.18	-1.49343	3.4372e-22	1.27474e-20
ABCA13	417.762	-1.48889	9.28249e-27	4.78065e-25
MUM1L1	173.477	-1.48858	3.37584e-13	5.88551e-12
MPZ	13.2623	-1.48564	0.000222697	0.00101569
ZBTB8B	87.2581	-1.48537	3.62919e-11	5.00903e-10
TEX15	59.852	-1.47802	5.7243e-08	5.23411e-07
C1orf141	4.86099	-1.47735	0.000291363	0.00129588
PLCE1	17.6933	-1.47733	9.21584e-05	0.000457808
LINC00520	7940.35	-1.47665	2.92965e-21	1.01184e-19
TNFRSF19	7457.11	-1.47488	4.09329e-63	9.03936e-61
BCHE	5749.52	-1.47097	4.30615e-40	4.75471e-38
GULP1	29.5717	-1.47049	7.35933e-06	4.69625e-05
HSD3BP4	56.992	-1.46734	6.97099e-06	4.46211e-05
CBS	431.358	-1.46711	8.1164e-30	5.37712e-28
PPM1M	43.6796	-1.46709	1.05397e-06	7.97593e-06
MARS	1744.59	-1.46677	2.32266e-43	2.86888e-41
FRG2C	7.16109	-1.46541	0.00048893	0.00205542
PALD1	12.4106	-1.46489	0.000276089	0.00123511
GAS5	36708.9	-1.45762	1.52951e-52	2.50478e-50
AHR	950.461	-1.45468	1.79207e-36	1.64273e-34
HMGA2	5999.26	-1.45228	3.83897e-63	8.60815e-61
ENPP4	8.54276	-1.45122	0.000528561	0.00220486
TDRD3	2831.39	-1.45063	1.6841e-28	1.00597e-26
DBNDD2	68.0048	-1.44997	2.74561e-08	2.60699e-07
LINC00702	10.1877	-1.44835	0.000489828	0.00205801
LDLRAD3	436.071	-1.44806	4.67294e-12	7.19198e-11
MIR100HG	1013.65	-1.44783	2.18521e-37	2.15199e-35
TCN1	162.906	-1.4469	9.26166e-15	1.89591e-13
LRRC49	967.28	-1.44681	8.36641e-42	9.83391e-40
UGCG	583.385	-1.44289	1.49199e-12	2.43242e-11
CENPH	1687.9	-1.43499	5.72225e-50	8.59812e-48
SDC3	1358.71	-1.43484	3.9417e-14	7.52953e-13
LINC00263	396.286	-1.43323	2.08108e-24	9.16366e-23
AGAP11	98.8101	-1.43317	1.09603e-09	1.26582e-08
IL10	4.5159	-1.43126	0.000424495	0.0018149
FAM171B	169.198	-1.43061	6.18582e-14	1.16183e-12
RASA2	169.434	-1.43007	9.92631e-14	1.81526e-12
SCARNA9L	42.4692	-1.42947	7.2212e-05	0.000366466
ATOX1	15903.9	-1.42939	1.26166e-26	6.45215e-25
SSMEM1	5.42167	-1.42928	0.000541814	0.00225369
AARS	1387.63	-1.42679	1.13439e-45	1.50306e-43
EPHA2	80.0583	-1.42607	2.20883e-09	2.45005e-08
ZNF415	14.3636	-1.42606	0.000324319	0.0014255
PSPH	1134.76	-1.42293	7.61429e-34	6.16546e-32
ZFAND1	5617.11	-1.42129	1.25984e-45	1.63948e-43
E2F5	348.72	-1.4167	1.07838e-20	3.60492e-19
DISC1FP1	13.4334	-1.41635	0.000386139	0.00166656
SEL1L3	466.706	-1.4158	5.36546e-25	2.46693e-23
LINC00488	44.4241	-1.41562	4.17819e-06	2.79473e-05
HCG22	9.52905	-1.41527	0.000683678	0.00276334
XPOT	7876.49	-1.41301	5.01519e-56	9.13705e-54
CEBPG	1415.94	-1.4122	4.97939e-44	6.20296e-42
ETV1	3229.17	-1.41193	1.7989e-41	2.09752e-39
EIF2AK2	1388.12	-1.40982	1.09286e-32	8.08548e-31
RAPGEF4	94.064	-1.40915	2.84142e-10	3.53058e-09
ICAM1	261.523	-1.40817	7.01627e-18	1.86951e-16
GABRG1	5.03451	-1.40705	0.000638863	0.0026046
HBE1	32.7094	-1.40567	5.20038e-05	0.000273531
DOCK3	9.0235	-1.4045	0.00080815	0.0032025
ZNF277	2196.08	-1.40423	4.00791e-44	5.0358e-42
ZNF812	16.2116	-1.39813	0.000287726	0.0012801
GNG11	19849.3	-1.39806	3.60421e-23	1.45114e-21
IER2	120.403	-1.39794	6.72429e-11	8.93405e-10
EMILIN2	55.6103	-1.39713	4.09394e-07	3.30577e-06
IVNS1ABP	15464.5	-1.39523	2.48435e-47	3.35272e-45
ZMYND12	16.5175	-1.39086	0.000295336	0.00131155
LOC100507006	4.85704	-1.3882	0.000746481	0.0029849
ATP8B3	4.88719	-1.37534	0.000819946	0.00324131
MIR17HG	484.468	-1.3732	5.4896e-29	3.40472e-27
FAM27E2	27.2229	-1.37247	7.07679e-05	0.000360392
FLRT2	426.696	-1.37008	5.37439e-23	2.12858e-21
DTX3L	790.28	-1.36727	1.10197e-31	7.95113e-30
TOM1L1	3141.63	-1.36606	1.24348e-29	8.16385e-28
HMMR	9089.97	-1.36259	4.09578e-35	3.53231e-33
LRRIQ1	203.757	-1.35959	4.34932e-14	8.28645e-13
NRROS	21.9588	-1.35217	0.000187709	0.00087137
AK7	19.6683	-1.35194	0.000379756	0.00164144
A2M	35.8493	-1.35015	1.33004e-05	8.05706e-05
RAB3IP	519.323	-1.34877	1.03576e-28	6.26401e-27
EIF3E	86459.6	-1.34843	1.05892e-32	7.87433e-31
LOC100506474	222.861	-1.34791	1.07872e-16	2.58166e-15
GPR160	13.9158	-1.34754	0.000880091	0.0034575
ADPRM	1054.19	-1.34653	8.17388e-20	2.55105e-18
FSIP1	20.3373	-1.34215	0.000271607	0.00121836
IFIT1	1345.34	-1.33879	1.20555e-22	4.62392e-21
GNG12	22842.8	-1.33826	5.007e-42	5.9331e-40
THG1L	79.8641	-1.33449	2.04138e-06	1.4535e-05
ZNF214	19.5783	-1.3343	0.000309306	0.00136859
SNHG5	58191.6	-1.32751	9.35266e-26	4.57433e-24
LCA5L	41.0301	-1.32574	4.80356e-05	0.000254219
LINC00479	14.6066	-1.32486	0.000705584	0.00283693
MIRLET7DHG	21.2632	-1.32443	0.000235228	0.00106672
SLC22A23	396.963	-1.32059	5.28602e-19	1.54991e-17
TTK	6073.43	-1.31829	8.78766e-36	7.80977e-34
PARP12	95.632	-1.31682	6.00214e-09	6.26207e-08
PROCR	11.9085	-1.31618	0.00131997	0.004952
PTPRD	130.49	-1.31258	2.35562e-11	3.35612e-10
OPHN1	2044.05	-1.31246	6.71416e-48	9.4095e-46
KLRC4	4.55213	-1.31127	0.00134276	0.00502585
IQUB	58.7684	-1.30911	1.71413e-06	1.2368e-05
EIF2A	13270.1	-1.30823	2.86914e-48	4.05998e-46
CCNB1IP1	3845.87	-1.30778	3.8574e-23	1.54455e-21
IPO11	582.078	-1.30619	5.42387e-11	7.3265e-10
FAM72C	435.109	-1.3058	5.99742e-11	8.04162e-10
ZNF883	15.1398	-1.30396	0.000882044	0.00346252
LINC00866	3.91769	-1.30323	0.0011213	0.00428274
CDS1	133.642	-1.30166	4.07247e-11	5.57335e-10
TUBE1	1263.49	-1.30091	5.71059e-35	4.83906e-33
PROX1	62.9561	-1.29862	1.91213e-06	1.36816e-05
FAM184A	475.809	-1.29728	5.23781e-22	1.89903e-20
FAM60A	3085.33	-1.29628	2.21487e-49	3.22817e-47
LINC00920	864.9	-1.29427	9.97731e-23	3.86754e-21
FAM212A	31.2381	-1.29325	5.97917e-05	0.000309799
GS1-279B7.1	3.92754	-1.29171	0.00121399	0.0046042
RSL1D1	6414.29	-1.2916	2.43108e-20	7.85655e-19
SLC27A5	138.475	-1.29036	4.86284e-10	5.85267e-09
LOC101928545	23.5577	-1.29032	0.000249674	0.00112697
RPL14	65953.6	-1.28825	3.31413e-41	3.7737e-39
LINC00622	3612.75	-1.28749	5.69112e-32	4.1474e-30
DNAH7	75.2147	-1.28677	1.91083e-07	1.62582e-06
SOHLH2	46.4763	-1.28553	1.5768e-05	9.40336e-05
LOC100506548	975.278	-1.28385	1.56941e-25	7.54921e-24
SPRY2	690.045	-1.28291	2.35087e-19	7.09397e-18
CSGALNACT1	70.1428	-1.28169	9.99875e-07	7.59415e-06
XRCC2	262.35	-1.28152	1.20695e-14	2.42546e-13
RAD51B	397.058	-1.27753	1.94458e-14	3.83003e-13
C2orf88	47.6402	-1.27599	8.6282e-06	5.425e-05
FOLH1	104.541	-1.27453	7.4265e-08	6.69395e-07
HIBCH	7340.22	-1.27194	5.64036e-36	5.1061e-34
ANXA1	24.7021	-1.27046	0.00135162	0.00505645
TFB1M	629.466	-1.27002	2.43082e-18	6.71008e-17
CCDC181	145.038	-1.26831	2.01368e-09	2.24555e-08
GOLGA7B	115.714	-1.26738	1.68711e-08	1.65364e-07
ATP8A1	18.1488	-1.26722	0.000646293	0.00262754
LINC00152	1163.07	-1.26415	4.11917e-23	1.64035e-21
PLK3	21.8928	-1.26315	0.00095648	0.00371455
UNC80	83.9991	-1.2614	1.13937e-07	9.95584e-07
LINC01013	689.759	-1.25898	2.28935e-28	1.33469e-26
SLC7A7	59.8051	-1.25787	1.79682e-06	1.29154e-05
IFITM1	3.73096	-1.2573	0.00155486	0.00571123
C1orf140	6.88472	-1.25646	0.00277364	0.0094874
EIF2S2	17799.8	-1.25546	2.0754e-27	1.12869e-25
TAPSAR1	8.19113	-1.25498	0.00282488	0.00963103
DEPDC7	87.6779	-1.25464	8.11808e-08	7.2813e-07
FOXO6	6.57575	-1.2542	0.00266871	0.00916287
SERPINB8	86.4574	-1.25196	4.67841e-08	4.32115e-07
USH2A	142.962	-1.25034	6.53062e-11	8.70849e-10
TEX9	384.23	-1.25016	1.48792e-19	4.56613e-18
ZBED9	52.0534	-1.24732	5.11508e-06	3.37075e-05
MAL2	46.8883	-1.24463	1.73617e-05	0.000102614
LINC00467	1345.27	-1.24455	4.50614e-19	1.32681e-17
FAM107B	1410.79	-1.24393	4.06842e-30	2.74524e-28
HBQ1	8.25202	-1.24154	0.00302939	0.0102515
LOC101927811	80.5807	-1.24102	8.6549e-07	6.63922e-06
PYCR1	479.51	-1.24038	3.32891e-19	9.88164e-18
LOC399815	79.2874	-1.2398	2.56362e-07	2.13513e-06
LINC00327	27.7672	-1.23917	0.000312585	0.00138058
ANGPTL1	88.7565	-1.23908	1.74243e-07	1.49037e-06
IFT74	1498.21	-1.23627	4.01035e-24	1.70411e-22
PRR9	5.99587	-1.2349	0.00316819	0.0106717
GADL1	24.647	-1.23429	0.000355625	0.00154862
TATDN1	2886.95	-1.23201	3.91231e-24	1.66731e-22
ID1	9.75216	-1.23177	0.00297415	0.0100904
RUNDC3B	118.172	-1.22867	5.15034e-09	5.42386e-08
CEP290	1415.8	-1.22322	5.53697e-22	2.00252e-20
ITIH5	189.156	-1.22249	5.3232e-09	5.59377e-08
LOC100507250	130.224	-1.22238	3.52409e-09	3.78862e-08
C4orf36	7.58825	-1.22063	0.00364966	0.012084
CASC1	44.9574	-1.22044	3.20373e-05	0.000177613
GPR137B	10512.1	-1.21928	3.42447e-30	2.33232e-28
SLC43A1	51.3681	-1.21851	1.01229e-05	6.25706e-05
MND1	4336.34	-1.21777	4.70555e-21	1.60617e-19
LHFPL3-AS1	20052	-1.21413	8.76261e-23	3.42417e-21
CALCR	7.84283	-1.21349	0.00388587	0.0127934
KIF6	107.082	-1.2106	5.16853e-06	3.39373e-05
RPL4	66868.2	-1.20746	3.87628e-23	1.54786e-21
IFIH1	559.859	-1.20675	6.4162e-19	1.85548e-17
PSMB9	29.9604	-1.20488	0.0003194	0.00140684
LINC01207	7.1342	-1.204	0.00412741	0.0134459
VLDLR-AS1	8.41189	-1.20285	0.00419818	0.0136429
PRIM1	7901.54	-1.20139	2.85053e-27	1.52744e-25
ZNF215	184.245	-1.20137	1.97323e-12	3.1639e-11
RASEF	1358.58	-1.20047	3.88328e-32	2.84416e-30
RPL5	143891	-1.19981	6.98061e-29	4.31112e-27
CTSS	34.8703	-1.19965	0.000147917	0.000702704
BATF3	6.98121	-1.19883	0.00433735	0.0140202
VAMP8	10.6783	-1.19882	0.00338812	0.0113313
KIF27	55.3544	-1.19813	0.000199992	0.000920974
MYOZ2	2631.85	-1.19768	1.33718e-37	1.35343e-35
GNL3	3648.66	-1.19746	1.20158e-15	2.60999e-14
MTTP	8.41097	-1.19731	0.00413412	0.0134647
CPT1C	90.3196	-1.19684	4.95007e-07	3.96629e-06
CCDC125	67.3602	-1.19655	2.00591e-06	1.42964e-05
EPB41L4A-AS1	403.135	-1.19314	2.61008e-16	6.0193e-15
STEAP1	986.387	-1.19228	7.46087e-28	4.18239e-26
TCP11L2	65.9975	-1.19227	1.55619e-06	1.13294e-05
MICAL2	64.624	-1.19155	1.78146e-05	0.000104993
GATM	123.895	-1.19048	6.8206e-09	7.05037e-08
LOC388692	3.41126	-1.18964	0.00248257	0.00859872
LOC102659288	6.07931	-1.18828	0.00443045	0.0142811
PPM1E	380.927	-1.18773	1.21619e-16	2.88226e-15
AMN1	669.323	-1.18744	1.00732e-20	3.38289e-19
POLR1E	294.507	-1.18725	2.85301e-11	3.99449e-10
AUNIP	352.834	-1.18695	3.08112e-17	7.76944e-16
CD109	1078.28	-1.18651	3.32092e-25	1.56642e-23
TRIM51HP	7.28644	-1.18629	0.00474917	0.015153
ITPR2	960.565	-1.18614	3.49495e-28	1.99882e-26
INHBE	11.7825	-1.18264	0.00363292	0.0120368
TPRKB	8424.18	-1.18118	3.81545e-19	1.12799e-17
LOC101559451	17.19	-1.18065	0.00189586	0.00680299
SLCO1B1	69.761	-1.18019	1.26251e-06	9.38831e-06
FGF13	1396.29	-1.17716	2.20358e-29	1.42111e-27
NDUFC2-KCTD14	21.258	-1.17704	0.00175779	0.00637309
LINC00693	202.188	-1.17621	2.29198e-12	3.64293e-11
ENTPD1	6018.22	-1.17595	5.89367e-37	5.6144e-35
RPS25	127600	-1.17486	1.8487e-17	4.79445e-16
SPATA17	115.947	-1.17412	6.49729e-08	5.89651e-07
GFOD1	71.1584	-1.17408	2.96752e-06	2.0479e-05
ADD3-AS1	38.3121	-1.17348	0.000126493	0.000609265
SLC44A3	126.961	-1.16977	1.64345e-08	1.61519e-07
ZNF620	83.0863	-1.16839	1.22992e-06	9.16932e-06
BAIAP2L1	96.6283	-1.16678	2.51263e-07	2.09626e-06
GBP2	284.88	-1.16515	6.17977e-11	8.26332e-10
TNFRSF11B	7.6319	-1.16472	0.00554734	0.0173057
GPC3	4.38624	-1.16448	0.00451143	0.0144975
IQGAP2	122.098	-1.16367	4.18866e-09	4.45943e-08
TMEM67	778.022	-1.16363	3.04068e-27	1.61156e-25
PLS1	2508.38	-1.1634	6.03597e-36	5.43051e-34
POLR3G	4130.65	-1.16111	9.26045e-36	8.18007e-34
TMA16	2190.69	-1.15944	1.18084e-27	6.49463e-26
IFI6	3301.27	-1.15874	2.03278e-24	8.9781e-23
SLITRK2	44.0059	-1.15717	5.71196e-05	0.00029786
CLIC4	19293.1	-1.15665	2.36568e-39	2.57311e-37
IL23R	40.7216	-1.1545	0.000109333	0.00053438
ST6GAL1	426.257	-1.15446	4.24324e-17	1.05538e-15
MTHFD2P1	744.83	-1.15405	4.80895e-24	2.01409e-22
ZNF391	43.4528	-1.15313	8.04016e-05	0.000404366
TRMT11	2147.1	-1.15138	1.8181e-28	1.08159e-26
DYDC2	24.284	-1.15061	0.00126681	0.00477223
TPD52L1	19.571	-1.14704	0.00182161	0.00657177
RPS6	120035	-1.14678	3.49707e-28	1.99882e-26
ASB4	11199	-1.14641	1.37819e-21	4.86373e-20
ASAH2B	37.4583	-1.14614	0.000363251	0.00157759
OAS3	358.256	-1.14354	2.36283e-15	5.00556e-14
NUDCD1	4059.71	-1.14032	8.97134e-23	3.49619e-21
MX1	41.8839	-1.13975	0.000103625	0.000509901
FAM27E3	32.9725	-1.13944	0.000299109	0.00132548
SLC12A1	92.5829	-1.13849	3.93788e-06	2.64613e-05
CYP1A1	25.7402	-1.13843	0.00108424	0.00415426
LRRCC1	1404.21	-1.13732	5.97556e-18	1.6069e-16
HES1	458.705	-1.13713	3.64811e-19	1.08072e-17
CENPU	8118.71	-1.13676	2.53023e-34	2.11943e-32
TMX4	761.02	-1.13573	9.94069e-21	3.34609e-19
LZTFL1	2718.38	-1.13525	3.5447e-36	3.229e-34
PFKFB4	24.7776	-1.13345	0.00122061	0.00462689
CASP4	258.79	-1.13334	2.51184e-12	3.97503e-11
LUM	549.316	-1.13331	1.73906e-21	6.09298e-20
SPX	3.37304	-1.13111	0.0036	0.0119386
BIRC7	425.144	-1.13099	4.64384e-17	1.14719e-15
LOC101928505	22.4673	-1.13047	0.00137049	0.0051189
MYO3B	19.6366	-1.13024	0.00216289	0.00762558
LOC101927166	3.232	-1.1301	0.00365834	0.0121072
TMEM159	184.27	-1.12856	1.76336e-10	2.23876e-09
SLC39A11	733.976	-1.1275	1.43707e-18	4.05131e-17
LOC100505812	61.1167	-1.12692	2.79611e-05	0.000157531
EXOSC8	8250	-1.1263	1.56989e-31	1.12715e-29
FBXO36	64.3354	-1.12557	1.00413e-05	6.20927e-05
RPS3A	208471	-1.12547	8.45584e-28	4.68608e-26
C21orf37	22.9386	-1.12488	0.00178242	0.00644636
MFAP2	3.85778	-1.12408	0.0049021	0.0155525
LOC441461	32.3458	-1.12362	0.000433797	0.00184871
RPL36A	114180	-1.12324	5.21986e-17	1.28296e-15
LOC101926963	5.39972	-1.1226	0.00716646	0.0216031
LOC256880	31.8617	-1.12221	0.000958	0.00371847
FRMD5	652.068	-1.12178	1.1354e-19	3.51346e-18
C8orf88	1100.9	-1.12162	4.54133e-25	2.11469e-23
NSMAF	2234.24	-1.12137	3.52047e-27	1.84571e-25
ZNF121	186.658	-1.12135	4.39303e-11	5.97838e-10
LYRM1	1947.65	-1.12103	3.8357e-34	3.1585e-32
EIF3H	15650.1	-1.12095	7.53424e-29	4.61393e-27
FAT2	25.2096	-1.12068	0.00154995	0.00569749
FRG1B	273.519	-1.12067	3.11583e-13	5.45178e-12
PPIL6	45.0733	-1.12019	8.59599e-05	0.000429587
TLR6	84.3519	-1.11794	5.51414e-06	3.59913e-05
CASP8	131.509	-1.11638	1.24264e-08	1.24307e-07
RPS6KA2	491.453	-1.11605	3.74867e-16	8.49718e-15
CCDC102B	20.8875	-1.11561	0.00348588	0.011609
KLHL7-AS1	174.065	-1.11555	7.13961e-09	7.35926e-08
LINC01301	96.0965	-1.11551	3.91264e-07	3.16639e-06
FLJ16779	59.5126	-1.11381	9.85289e-05	0.000486635
ABCB4	243.488	-1.11317	6.42048e-13	1.09193e-11
EXOC6	1015.91	-1.11261	4.08978e-24	1.72778e-22
EVA1C	52.7394	-1.11256	4.13892e-05	0.000222765
SLC29A2	42.2713	-1.11091	0.000176059	0.000821141
PPAP2C	85.5592	-1.11018	1.06795e-05	6.57596e-05
PSAT1	3422.8	-1.10985	3.0948e-35	2.68492e-33
FRRS1	338.167	-1.10982	1.07718e-09	1.24701e-08
IDNK	53.6417	-1.10881	5.98135e-05	0.000309801
LOC101926895	5.80715	-1.10706	0.00819142	0.0242712
SMG1P7	15.3162	-1.10632	0.00396722	0.0129997
SP110	242.888	-1.10613	1.95829e-12	3.14341e-11
SEMA3D	40.9332	-1.10458	0.00020956	0.000961694
DUXAP10	1055.57	-1.10444	1.82012e-15	3.88977e-14
LIN9	1831.03	-1.10443	6.31994e-25	2.87854e-23
LINC00889	27.694	-1.10412	0.0015184	0.00558854
LOC285000	747.346	-1.1033	2.06426e-19	6.24204e-18
CENPE	3474.71	-1.10213	1.1782e-25	5.7241e-24
LIN28B	1265.84	-1.10196	2.45452e-25	1.1691e-23
TEX10	712.877	-1.10186	7.43785e-16	1.64752e-14
ZRANB3	240.366	-1.10094	6.90042e-12	1.03791e-10
HMGB2	8974.49	-1.10032	1.18332e-19	3.654e-18
CCDC18	1212.94	-1.09758	4.00368e-15	8.34816e-14
RAET1K	28.4571	-1.0974	0.00144608	0.00535349
TBC1D4	1301.04	-1.09736	1.52477e-26	7.77045e-25
ARRDC3-AS1	19.6203	-1.09715	0.002625	0.00904263
PLAT	1443.84	-1.09698	5.97905e-20	1.88625e-18
CD44	22.8518	-1.09628	0.00164438	0.0059977
CD55	797.018	-1.09589	5.97653e-23	2.36065e-21
USP18	75.7704	-1.09522	3.7103e-05	0.00020231
DSC1	3.69763	-1.09467	0.00595542	0.0184289
MAML2	748.125	-1.09259	1.70067e-19	5.18563e-18
FLT3LG	8.44216	-1.09164	0.00897859	0.0263518
FLJ20021	20.2171	-1.09019	0.00319563	0.0107517
ZFP90	36.8508	-1.08862	0.000780533	0.00310318
SNHG4	45.6501	-1.08763	0.000213906	0.000980403
HACL1	808.619	-1.0871	7.96112e-19	2.27516e-17
ARHGAP19	425.194	-1.08557	8.572e-15	1.75968e-13
PIH1D2	556.436	-1.08537	5.90064e-19	1.72348e-17
RPL31	142991	-1.08513	8.0121e-16	1.76666e-14
INPP4B	2571.95	-1.08436	3.87933e-26	1.93634e-24
RPL12	62058.3	-1.0834	2.02249e-27	1.10404e-25
COL9A1	43.5364	-1.08292	0.000294688	0.00130959
IL1RAP	4957.1	-1.08185	1.64052e-28	9.83973e-27
RPSAP9	2079.3	-1.08158	1.82995e-12	2.9668e-11
MORF4L2-AS1	15.9445	-1.08117	0.00499267	0.0157987
STXBP6	173.568	-1.07992	7.27276e-10	8.55532e-09
DMRTA1	4.21367	-1.0795	0.007724	0.0230549
ACOT12	593.809	-1.07923	6.3859e-19	1.85039e-17
ASAH2	34.8475	-1.07791	0.000525488	0.00219304
DCN	8.34704	-1.07697	0.00994265	0.0287642
KIF20B	4040.53	-1.07662	8.29692e-28	4.61556e-26
LINC00659	3.22572	-1.07661	0.00506631	0.0160003
SRFBP1	1499.58	-1.07635	2.01687e-18	5.62062e-17
CCDC65	8.77326	-1.07619	0.00965257	0.0280363
TAF1D	3969	-1.07572	7.96024e-16	1.75789e-14
RUNX2	170.921	-1.07535	1.82831e-08	1.78483e-07
MTHFD1L	722.778	-1.07484	3.00283e-17	7.58514e-16
N4BP2L2	5137.97	-1.07453	1.4881e-19	4.56613e-18
DNAAF3	22.9311	-1.07402	0.00324682	0.0109138
DKFZP434L187	45.1772	-1.07306	0.000168182	0.000789037
ZBTB26	100.031	-1.07283	3.10713e-05	0.000173113
DAZ2	1675.2	-1.07137	1.23349e-21	4.39564e-20
LPAR1	135.97	-1.06952	2.41851e-08	2.31084e-07
DLGAP5	7680.41	-1.06621	3.58353e-22	1.31894e-20
ZSWIM8-AS1	13.6094	-1.06545	0.00690576	0.0209255
RNMT	2165.95	-1.06505	9.51566e-21	3.21044e-19
HAX1	1322.48	-1.0617	3.92645e-18	1.0657e-16
DEPDC4	239.223	-1.06105	3.16471e-11	4.4055e-10
ZNF697	8746.79	-1.06078	4.13363e-28	2.34427e-26
FXYD1	8.26248	-1.06053	0.011447	0.0325416
ANKRD37	225.304	-1.06014	1.1215e-10	1.4491e-09
ATM	6342.25	-1.05987	1.86477e-21	6.51775e-20
LINC00869	68.6316	-1.05865	4.10709e-05	0.000221215
LOC101060211	6.89098	-1.05823	0.0118072	0.0334026
SEMA6B	17.8127	-1.05709	0.00850358	0.0250636
RPL7	231290	-1.05623	2.65748e-29	1.69881e-27
SPTA1	23.2982	-1.05586	0.00264995	0.0091049
PIWIL2	6.59929	-1.05488	0.0119214	0.0336798
CD68	626.217	-1.05366	5.34188e-11	7.22244e-10
ZCCHC7	1179	-1.05169	3.27431e-20	1.04427e-18
TP53TG3	775.415	-1.0516	4.40419e-22	1.60478e-20
LOC100506325	44.445	-1.0512	0.000435126	0.00185275
SUN3	32.4228	-1.05078	0.000961122	0.00372862
LOC100507377	3.60585	-1.05077	0.00779644	0.0232189
TP53TG3B	774.908	-1.05025	4.76865e-22	1.73324e-20
RHEBL1	30.8723	-1.04979	0.00303116	0.0102527
LOC101927129	12.435	-1.04936	0.00921885	0.0269863
FAM24B	266.576	-1.04918	8.63643e-10	1.0062e-08
NPHP3-ACAD11	72.7235	-1.0486	5.30165e-05	0.000277855
ENOX1	95.4633	-1.04553	1.16771e-06	8.74745e-06
IFI30	181.142	-1.04552	1.44936e-09	1.65164e-08
CYP39A1	45.5204	-1.04506	0.000375748	0.00162605
BTF3L4	14058.2	-1.04485	6.57873e-31	4.63213e-29
SYNJ2	162.779	-1.04462	5.80066e-09	6.0649e-08
IFIT3	406.475	-1.04446	1.23718e-12	2.0375e-11
RPS19	21190.4	-1.04384	2.2077e-18	6.12899e-17
SLAMF1	5.05385	-1.04312	0.0120716	0.0340383
IL7R	11.9176	-1.0429	0.0106743	0.0306135
TNFAIP3	3161.46	-1.04244	2.99111e-30	2.04673e-28
GLRB	42.6403	-1.04211	0.000673331	0.0027253
KIF18A	3259.1	-1.04199	2.88354e-28	1.66776e-26
LONRF2	1790.42	-1.03915	7.99088e-15	1.64501e-13
TM4SF19	1789.25	-1.03824	7.73289e-30	5.14643e-28
FCER1G	4.8734	-1.03782	0.0126594	0.0355034
PNLIPRP3	151.742	-1.03711	7.49002e-09	7.67701e-08
PELI1	2050.33	-1.03696	2.60648e-22	9.76594e-21
KLF5	529.96	-1.03572	8.11764e-10	9.50318e-09
LCP2	5.88241	-1.0354	0.0130904	0.0366065
ACSL1	6550.18	-1.03456	3.43337e-23	1.38619e-21
MUC2	7.06278	-1.03387	0.0138959	0.0384969
FAM216B	3.39447	-1.03316	0.00880166	0.025869
BLOC1S1-RDH5	36.673	-1.03264	0.000704971	0.00283536
WARS	1156.64	-1.0321	1.31244e-22	4.99446e-21
EPRS	3168.42	-1.03166	6.91956e-23	2.7184e-21
EGR3	17.8154	-1.03103	0.00901437	0.0264515
GLS	11445.7	-1.03044	7.48539e-25	3.38818e-23
C12orf60	1252.37	-1.0299	3.19711e-24	1.38684e-22
RAP1GDS1	2422.05	-1.02931	5.93738e-27	3.07962e-25
ATHL1	22.2984	-1.02821	0.00410028	0.0133665
STEAP3	6.56211	-1.02658	0.014577	0.0400189
PACSIN2	968.137	-1.02543	3.40452e-16	7.76539e-15
SCRG1	3.43388	-1.02511	0.00917848	0.0268789
COL9A3	56.9141	-1.02504	0.000239335	0.00108366
BBC3	35.201	-1.02495	0.00134505	0.00503314
ZNF813	146.386	-1.02491	2.77809e-08	2.6344e-07
IL6R	605.81	-1.02407	5.10599e-18	1.38327e-16
TSEN15	5635.6	-1.02397	6.16575e-31	4.36242e-29
CALR3	7.71961	-1.0238	0.0146973	0.0403111
ESR2	29.4769	-1.02282	0.00247458	0.00857719
LINC00963	90.8641	-1.02267	2.1287e-05	0.000123412
RPL21P28	196903	-1.02111	1.99159e-14	3.91733e-13
LOC100131564	293.28	-1.02097	3.27479e-13	5.71618e-12
IFI16	9388.57	-1.01701	1.8712e-19	5.69369e-18
PDK4	20557.4	-1.01687	1.15278e-28	6.94288e-27
ABCG5	22.2251	-1.01659	0.00697058	0.0210912
PHLDA1	5891.49	-1.01658	3.71722e-23	1.49252e-21
RBM11	228.089	-1.01564	4.7356e-10	5.70897e-09
AGA	2015.79	-1.01482	1.81928e-24	8.08413e-23
MALT1	1294.99	-1.01466	2.11056e-21	7.34163e-20
NOC3L	2648.8	-1.01452	4.84721e-24	2.0243e-22
RBBP8	1486.58	-1.014	1.14085e-22	4.3989e-21
KIAA0408	24.0878	-1.01389	0.00514954	0.016228
MFI2	174.489	-1.01308	6.52213e-07	5.11625e-06
LINC00668	10.455	-1.01228	0.0141413	0.0390285
C8orf37	130.191	-1.01091	2.33406e-07	1.95849e-06
FAIM3	9.57215	-1.01025	0.0153106	0.0418201
C7orf57	37.9341	-1.00994	0.0010116	0.00390778
THEMIS	5.11671	-1.00811	0.0136789	0.0380115
CFHR1	5.00408	-1.00752	0.0146449	0.040175
TSGA10	58.3719	-1.00743	0.00010579	0.000519505
PRIM2	1958.49	-1.00723	1.07797e-11	1.59022e-10
LINC-PINT	374.861	-1.007	4.97007e-12	7.63317e-11
MLF1	5262.15	-1.00623	1.98861e-28	1.16871e-26
ZNF558	294.315	-1.006	1.42982e-11	2.07359e-10
KIAA0020	1924.87	-1.00591	3.36079e-12	5.24448e-11
LOC101927023	2.89676	-1.00588	0.00781931	0.0232775
SPAG1	596.873	-1.00568	2.07737e-15	4.4201e-14
NDC80	3835.74	-1.00553	3.35955e-15	7.05553e-14
XRCC4	4636.93	-1.00549	2.21814e-18	6.14626e-17
MNS1	1027.96	-1.00531	1.49696e-10	1.90886e-09
C9orf153	18.4598	-1.00284	0.00708946	0.0214065
SMG1P5	42.1463	-1.0026	0.0025302	0.00875746
LARS	4883.42	-1.00192	6.35544e-25	2.88569e-23
UHRF1BP1	1869.79	-1.00128	4.51058e-24	1.89457e-22
MAP3K1	2633.88	-1.00073	4.9057e-21	1.67057e-19
PTPRK	1174.85	-1.00023	1.3803e-18	3.90638e-17
RPL39	392380	-0.999683	1.94642e-11	2.79223e-10
RPL17	187879	-0.999368	6.89622e-19	1.98641e-17
PLLP	5.07048	-0.999137	0.0152555	0.0417008
HS3ST1	256.736	-0.998692	2.12616e-08	2.06159e-07
LEPR	177.757	-0.99844	6.14005e-09	6.39224e-08
CXorf58	4.49867	-0.997541	0.0142249	0.0391997
LOC728730	147.138	-0.99753	1.1808e-07	1.02993e-06
ZP1	2.75632	-0.995573	0.00837238	0.0247319
SERPIND1	5.15653	-0.994632	0.0154327	0.0421063
LOC653653	142.155	-0.993006	1.55573e-06	1.13294e-05
GALNT13	7.8265	-0.99209	0.0177172	0.0472762
CROCC	141.25	-0.991731	2.88769e-05	0.000162252
PPM1J	6.87379	-0.991155	0.0183157	0.0485976
ITGB3BP	16862.7	-0.990483	1.46848e-17	3.84948e-16
RPF2	11736.1	-0.989875	3.24953e-22	1.20821e-20
GRPEL2	2113.02	-0.989453	2.21015e-20	7.17437e-19
SH2D5	15.7933	-0.98848	0.00969414	0.028129
FOS	534.552	-0.988366	6.9652e-11	9.23729e-10
LOC400655	185.769	-0.988169	6.32514e-07	4.97781e-06
PPP4R4	68.5037	-0.986918	5.84848e-05	0.000303784
RCOR2	4.62612	-0.986439	0.0125484	0.0352463
SDCBP	117395	-0.985442	2.80755e-28	1.63028e-26
LOC100132352	483.799	-0.985435	1.74084e-11	2.51215e-10
ANXA2R	42.1596	-0.984965	0.000971481	0.00376378
RPL26	203923	-0.984057	2.00935e-11	2.87402e-10
TNFRSF12A	21.0268	-0.983883	0.00609197	0.0187935
PSMB8	117.65	-0.983377	8.34032e-06	5.27147e-05
N4BP2L2-IT2	35.2154	-0.982847	0.00176649	0.00639986
FAM27B	31.5245	-0.981099	0.00318378	0.0107192
TMC1	19.8983	-0.980434	0.00802271	0.0238149
OLA1	6682.19	-0.979978	1.28465e-16	3.03464e-15
RPL29	20986	-0.979914	3.687e-22	1.3536e-20
LOC101927045	132.795	-0.97724	1.93157e-05	0.000112927
ATAD5	768.816	-0.97613	2.42954e-19	7.31622e-18
KRT23	4.67356	-0.975959	0.0180731	0.0480468
MOSPD1	4049.03	-0.975727	9.74326e-23	3.78688e-21
FAM86B1	49.3843	-0.973097	0.000702881	0.00283075
SLC16A1-AS1	50.8167	-0.97303	0.000419757	0.00179623
SNHG1	6828.74	-0.972231	1.39853e-22	5.29443e-21
METTL5	3041.35	-0.972068	3.50086e-18	9.55524e-17
SLC39A4	62.2669	-0.972055	0.000109305	0.00053438
POT1	3891.8	-0.971866	2.45698e-18	6.76947e-17
APOC2	18.1113	-0.971683	0.0110966	0.0316564
UBALD2	119.137	-0.970247	9.52145e-07	7.26191e-06
FOXN2	2975.36	-0.968782	3.96919e-22	1.4499e-20
ZNF625	13.5783	-0.968649	0.0140547	0.0388336
RPSAP58	4096.48	-0.967938	6.00738e-12	9.09216e-11
VRK1	5724.67	-0.967595	5.94709e-14	1.12278e-12
LOC100506258	35.0535	-0.966952	0.00264231	0.00909025
GPT2	234.929	-0.966831	3.63717e-10	4.44356e-09
CDK18	28.3758	-0.966802	0.00483989	0.0153886
EEF1E1	9743.6	-0.966658	5.29576e-19	1.54991e-17
ADCK3	59.7748	-0.966158	0.000148952	0.000707156
TMEM2	786.464	-0.966062	3.30714e-16	7.5551e-15
TMEM37	3.72223	-0.96546	0.015669	0.0426232
NSUN6	243.799	-0.964468	1.41111e-06	1.03769e-05
SDAD1	2302.27	-0.963764	3.41177e-17	8.54409e-16
RPL22	130818	-0.963384	9.90725e-20	3.07885e-18
SNHG8	6463.5	-0.962279	0.000366231	0.00158911
NUP35	1388.79	-0.96224	1.0958e-16	2.61824e-15
HULC	318.605	-0.96037	8.5541e-07	6.56535e-06
TAX1BP1	17643.1	-0.959851	3.19792e-14	6.14093e-13
NUF2	4924.53	-0.959678	5.9844e-19	1.74445e-17
RPL7L1	479.643	-0.959626	1.07688e-06	8.13242e-06
GRIK2	530.246	-0.958879	4.73468e-14	8.99712e-13
WDR31	56.7255	-0.958729	0.000237624	0.00107692
SWAP70	3595.43	-0.958504	1.13548e-20	3.77844e-19
GAL3ST4	15.0829	-0.957599	0.0137375	0.038152
SLC43A3	249.044	-0.957416	4.22097e-10	5.12672e-09
RPL32	90516.9	-0.957184	7.56796e-11	9.98217e-10
SEMA4C	343.158	-0.956339	0.00624695	0.0191925
PLA2G6	76.7323	-0.956039	0.000375661	0.00162605
FARSB	3527.74	-0.955585	1.06289e-07	9.33793e-07
LOC101928784	40.0612	-0.955325	0.00112942	0.00431035
RPL10A	43110.5	-0.954214	1.64976e-22	6.21324e-21
NAP1L1	85612.4	-0.953887	9.69686e-14	1.78e-12
C4orf47	14.1953	-0.953739	0.0140544	0.0388336
TATDN3	1378.02	-0.953738	1.20506e-18	3.42374e-17
TUSC3	700.835	-0.953386	3.98189e-17	9.92068e-16
RCN1	3813.63	-0.953124	2.5823e-26	1.29783e-24
TNFAIP8	328.569	-0.953077	6.67867e-08	6.04606e-07
BMPR1B	219.506	-0.952357	2.24414e-09	2.48543e-08
ZNF572	89.8479	-0.950322	5.08172e-05	0.00026787
EPB41	489.334	-0.948872	6.27297e-10	7.44532e-09
MANEA-AS1	62.623	-0.947704	0.000565619	0.00233538
HIST1H2AD	3.70252	-0.946725	0.017338	0.0464355
ACBD7	19.9403	-0.945032	0.0095667	0.027837
C9orf72	1782.14	-0.943753	1.43487e-23	5.8745e-22
S100A1	1456.04	-0.943286	1.7263e-15	3.70011e-14
MRE11A	1691.71	-0.942434	2.71245e-13	4.76888e-12
ZNF365	24.5683	-0.942134	0.00692267	0.0209723
ANKHD1-EIF4EBP3	78.275	-0.942126	0.000168085	0.000788996
ZNF703	96.3609	-0.941809	0.00214124	0.00756206
SPICE1	813.872	-0.94173	2.30839e-18	6.3842e-17
CIT	908.153	-0.941327	1.05791e-14	2.15049e-13
RPS23	233969	-0.940408	2.92377e-12	4.59697e-11
RPL21	995.232	-0.939216	0.0100909	0.0291294
HP09053	31.222	-0.938343	0.00389949	0.0128296
ALPK2	2.59736	-0.938237	0.0116264	0.0329807
LINC01138	112.664	-0.937142	6.14731e-06	3.97679e-05
C6orf57	120.672	-0.936504	2.51147e-06	1.75731e-05
ORC4	12813.1	-0.936298	2.57009e-20	8.26912e-19
AEN	235.363	-0.935136	1.16234e-08	1.16594e-07
CHEK2	1346.51	-0.934836	6.65173e-14	1.24134e-12
C12orf45	1541.38	-0.934678	6.20851e-14	1.16459e-12
GJB1	512.412	-0.933982	1.31197e-07	1.13957e-06
ARNTL2	56.8408	-0.93361	0.00054417	0.00226155
IFRD1	3401.36	-0.933464	2.56516e-26	1.29367e-24
DUS4L	964.981	-0.932382	6.44148e-19	1.8591e-17
MYCBP	2552.48	-0.930976	6.3346e-16	1.41389e-14
GRB10	1043.78	-0.930744	1.27875e-19	3.94034e-18
TES	766.11	-0.930657	4.09588e-12	6.36434e-11
LNP1	133.246	-0.929375	2.00964e-06	1.4316e-05
RPS24	242305	-0.929096	6.42879e-14	1.20437e-12
SNX9	1007.03	-0.928939	1.31928e-13	2.38567e-12
ZNF496	26.7577	-0.928531	0.0125621	0.0352711
POC1B	1821.22	-0.928393	2.44604e-23	9.93066e-22
ZNF799	174.116	-0.927965	5.21813e-07	4.1628e-06
MIS18BP1	3194.78	-0.927945	4.09607e-25	1.91962e-23
RPS18	121940	-0.927576	6.25448e-17	1.52695e-15
RAB39B	53.5236	-0.927151	0.000797144	0.00316491
RHOF	14.5108	-0.92661	0.017189	0.0460957
RPL6	106766	-0.925069	5.34578e-23	2.12302e-21
LOC285889	13.242	-0.92449	0.018421	0.0488246
MRGPRX4	2.57825	-0.923191	0.0126235	0.0354095
ABCA11P	610.521	-0.923092	2.40666e-10	3.01868e-09
PSME1	2367.27	-0.92299	1.55029e-12	2.52182e-11
TMEM161B	3453.35	-0.922533	3.62648e-24	1.55917e-22
ANG	188.801	-0.922205	7.44795e-08	6.70914e-07
RPL24	137043	-0.922198	1.33929e-14	2.67766e-13
PDLIM1	214.654	-0.921842	5.45383e-09	5.72279e-08
RAP1GAP2	28.5409	-0.920964	0.00816441	0.0242059
CMSS1	3446.14	-0.920928	1.18194e-16	2.81025e-15
SNHG12	227.797	-0.920288	4.25173e-09	4.51998e-08
GALNT12	119.151	-0.920172	6.00708e-06	3.89818e-05
DOCK11	231.224	-0.920108	9.4086e-08	8.34634e-07
FANCD2	1028.49	-0.919063	1.58342e-15	3.40389e-14
TCTEX1D2	25.0636	-0.918676	0.00915877	0.0268266
RMND1	2118.59	-0.918413	1.8486e-11	2.65714e-10
LY6E	226.286	-0.917984	1.45863e-06	1.06725e-05
IRAK1BP1	120.055	-0.917956	4.65729e-06	3.08826e-05
SLC39A10	3273.62	-0.917148	1.88178e-23	7.66117e-22
LOC101926940	600.927	-0.916707	7.16968e-08	6.46647e-07
DENND1A	114.717	-0.91651	5.81826e-05	0.000302645
CHN1	512.522	-0.916473	1.59708e-11	2.30698e-10
METTL12	50.5894	-0.916196	0.00195693	0.00699074
CEP70	3125.16	-0.915811	3.68175e-16	8.35849e-15
STAMBPL1	59.2417	-0.91498	0.00040364	0.00173388
RGS17	273.581	-0.914378	4.73958e-10	5.70904e-09
CDK7	2235.79	-0.912622	5.2156e-12	7.95993e-11
DPH5	7291.65	-0.91252	6.95774e-11	9.2358e-10
KIZ	988.593	-0.911464	1.17022e-13	2.12403e-12
SLC16A6	14215.2	-0.91083	2.26713e-27	1.21932e-25
PUS10	433.934	-0.910677	1.3509e-11	1.96501e-10
C21orf49	36.4729	-0.910471	0.00281797	0.00961198
LIAS	438.128	-0.909955	1.08605e-10	1.40828e-09
CNTNAP3B	32.0157	-0.909937	0.00552703	0.0172535
PSMG4	439.727	-0.9091	4.16259e-11	5.69134e-10
ROBO3	25.2596	-0.909077	0.00882553	0.0259182
KIAA0226L	573.976	-0.907899	5.06482e-14	9.59944e-13
ANO5	1840.38	-0.907352	7.88547e-20	2.47163e-18
IFNA14	2.91957	-0.906795	0.0185553	0.049109
KLF4	23.4935	-0.906194	0.0117227	0.033215
RPL23A	123452	-0.905899	1.11185e-10	1.43791e-09
CREB3L4	122.657	-0.905794	2.66186e-06	1.85186e-05
ITGA1	46.6691	-0.905689	0.00120589	0.00457585
CATIP-AS1	19.2478	-0.905639	0.0136454	0.03794
HELB	20.7246	-0.905594	0.0108582	0.0310799
SPA17	1665.53	-0.905196	9.51446e-14	1.75092e-12
DEPTOR	59.0384	-0.90322	0.00125634	0.00473752
RPS6KA5	411.828	-0.902339	4.11611e-12	6.38216e-11
RPL30	96903.2	-0.901404	1.23376e-12	2.03648e-11
LOC340357	55.2364	-0.900992	0.00100509	0.00388471
RFC4	8292.78	-0.900885	5.50919e-14	1.04146e-12
PAICS	17347.7	-0.900115	2.80779e-17	7.11714e-16
ERGIC2	4457.87	-0.899654	1.34784e-14	2.68737e-13
LINC00910	18.587	-0.898924	0.016405	0.0443112
RPL23	197364	-0.897021	2.73799e-13	4.80797e-12
PMS1	2323.47	-0.896739	5.58233e-22	2.01392e-20
RPL7A	41013	-0.895715	8.38521e-13	1.40962e-11
RPS17	203101	-0.895582	5.5368e-11	7.47211e-10
NT5C3A	4339.67	-0.894942	1.3316e-22	5.05419e-21
RPL11	97726.2	-0.894815	3.06791e-14	5.90684e-13
MIR4435-1HG	920.462	-0.894548	2.31097e-12	3.66911e-11
SNAPC1	3887.7	-0.894249	1.92723e-18	5.3811e-17
ZNF146	3883.83	-0.893912	1.11698e-13	2.03246e-12
SP100	846.653	-0.893559	1.30453e-14	2.61174e-13
SUPT3H	1110.73	-0.893128	1.07105e-14	2.17417e-13
RPSA	37454.5	-0.892975	3.3979e-17	8.52398e-16
RPL13AP5	52821.7	-0.891818	1.0183e-16	2.44108e-15
GGA1	463.404	-0.891587	2.56158e-06	1.78957e-05
CCDC148	49.1405	-0.891354	0.00142256	0.00528249
RDH8	26.157	-0.890693	0.00867685	0.025533
CNN3	24677.4	-0.890542	6.36248e-24	2.64952e-22
TTC8	1825.82	-0.8905	1.34764e-17	3.55187e-16
TXLNG	1061.97	-0.889928	2.04709e-17	5.26215e-16
CD58	2624.2	-0.888547	3.49454e-16	7.95827e-15
CCDC59	2785.77	-0.888327	9.18632e-16	2.02252e-14
RPS8	39700.3	-0.887786	5.83616e-18	1.57231e-16
GIN1	1644.56	-0.88731	1.77263e-17	4.61529e-16
EXOSC5	145.553	-0.887056	9.38404e-06	5.84497e-05
LITAF	8886.57	-0.886686	2.04396e-17	5.26215e-16
SAGE1	19.2082	-0.886266	0.0141956	0.039134
ATF6	1914.54	-0.885564	7.64415e-19	2.18887e-17
IER5L	93.3026	-0.885549	4.20059e-05	0.000225668
MS4A7	31.6711	-0.885155	0.00474302	0.0151368
DNTTIP2	7837.9	-0.88505	1.55944e-11	2.25485e-10
KRR1	7063.45	-0.884805	2.73187e-14	5.29481e-13
IQCB1	1282.51	-0.88407	2.36895e-16	5.49154e-15
SLX4IP	89.8074	-0.883876	7.46672e-05	0.000377349
DUSP5	106.89	-0.883738	1.57109e-05	9.37316e-05
KPNA5	324.43	-0.88338	1.19883e-09	1.37691e-08
THAP6	956.973	-0.882617	8.56527e-17	2.0703e-15
NR4A1	158.263	-0.8825	1.59898e-05	9.53174e-05
PRELID2	635.381	-0.882149	2.88157e-15	6.0868e-14
PNP	633.444	-0.881663	2.1387e-12	3.42168e-11
ELOVL3	21.011	-0.880855	0.0157784	0.0428711
FAM216A	416.118	-0.879955	6.63736e-11	8.83466e-10
KLF9	1931.24	-0.879644	2.59977e-13	4.57629e-12
NIFK	5210.26	-0.879443	7.7071e-22	2.75997e-20
CKAP2L	315.03	-0.878973	1.88324e-06	1.34881e-05
NPM3	506.575	-0.878829	4.80412e-06	3.17984e-05
LAMA4	98.185	-0.878102	3.28046e-05	0.000181383
CDC25C	453.17	-0.878074	2.51014e-09	2.76323e-08
TLCD1	85.3133	-0.87776	0.00010208	0.000502978
DOC2A	22.0778	-0.875805	0.0189033	0.0498851
SPATA24	68.7978	-0.875745	0.000749795	0.00299651
DYNC2LI1	7135.39	-0.875082	2.82019e-18	7.74093e-17
WDR75	3717.7	-0.874851	3.44982e-14	6.60725e-13
JMJD7	21.4676	-0.87446	0.0165402	0.0446102
ZNF334	22.1956	-0.874233	0.0130743	0.0365684
GSTO1	29321	-0.874219	4.98844e-19	1.46586e-17
SERPINA3	2.40825	-0.873628	0.0165941	0.0447307
NEDD4	2034.22	-0.873382	4.77235e-20	1.51211e-18
DYX1C1-CCPG1	1095.18	-0.873343	2.89814e-10	3.58273e-09
FAM72B	1010.63	-0.873225	3.82874e-15	7.99483e-14
C1orf115	27.5257	-0.871183	0.00908252	0.02663
TTC18	55.3541	-0.869821	0.00090467	0.00353975
CCNH	5793.76	-0.869698	2.13369e-20	6.95716e-19
CCPG1	5154.39	-0.869533	9.97357e-15	2.03345e-13
PKIB	94.0588	-0.86932	4.76603e-05	0.000252508
NFYB	5448.29	-0.86906	7.74761e-14	1.43849e-12
MATN3	319.331	-0.867136	6.52234e-08	5.91556e-07
COL15A1	22.7182	-0.865717	0.0165565	0.0446458
CWC22	1815.43	-0.864701	3.54748e-12	5.52989e-11
EBF3	1924.28	-0.864466	1.27474e-18	3.61465e-17
PTGR2	841.254	-0.863971	3.25018e-13	5.68002e-12
TFPI	1374.01	-0.863751	1.185e-15	2.57782e-14
NACA	91253.1	-0.863636	6.40648e-16	1.42774e-14
STOM	4419.57	-0.863108	1.0126e-23	4.16912e-22
ZNF589	147.976	-0.858818	9.40574e-06	5.85599e-05
RPL13A	12304.4	-0.857901	4.67931e-17	1.15399e-15
RPL34	114021	-0.857432	2.48942e-12	3.94813e-11
KIF15	598.578	-0.857374	3.97811e-11	5.45446e-10
KIAA1430	5641.86	-0.85717	8.03516e-20	2.51314e-18
ANKRD30B	816.84	-0.854247	5.3847e-10	6.45411e-09
ZFAS1	43945.7	-0.853279	1.77261e-13	3.18175e-12
CENPQ	6780.95	-0.852549	8.72077e-20	2.71592e-18
LINC01194	115.652	-0.851668	1.67603e-05	9.94223e-05
ACVR2B	1494.1	-0.851006	1.1925e-16	2.83073e-15
GPD1L	675.249	-0.850513	1.31022e-12	2.1505e-11
BLM	840.086	-0.849691	4.82614e-12	7.41993e-11
VEGFA	856.854	-0.84889	9.21717e-13	1.54592e-11
CEP57L1	2361.66	-0.848398	2.52352e-20	8.13722e-19
DOK3	60.038	-0.847484	0.00070339	0.00283124
COPS2	17386.5	-0.847462	2.40068e-16	5.55396e-15
TNIK	315.532	-0.847	3.86536e-08	3.6137e-07
TMEM18	1079.88	-0.846252	1.33415e-13	2.40956e-12
MRPS35	3050.65	-0.84617	2.29133e-13	4.05785e-12
SGOL2	5106.19	-0.845539	3.96595e-20	1.25934e-18
MORC1	269.066	-0.845534	5.92976e-08	5.40502e-07
LOC100506804	63.2454	-0.845442	0.00140463	0.00522392
STXBP5-AS1	32.1933	-0.845089	0.0102373	0.0295054
MECOM	75.5273	-0.844375	0.000283522	0.00126371
RPL9	133870	-0.844349	1.84417e-13	3.30612e-12
LOC100507459	112.13	-0.843605	2.9499e-05	0.000165111
EYA4-AS1	21.7562	-0.843082	0.0183512	0.0486662
GOLGA2P7	61.8294	-0.842718	0.000949728	0.00369289
LRRC75A-AS1	29101.3	-0.842525	2.89172e-14	5.58236e-13
DTNB	155.094	-0.842481	2.18987e-05	0.000126505
CCDC160	118.332	-0.842211	3.08365e-05	0.000171871
RPL27A	64635.3	-0.841915	1.91674e-15	4.09026e-14
CCSER1	88.1893	-0.841558	0.000322764	0.00141912
RPL35A	198676	-0.841543	6.17455e-10	7.34646e-09
ANXA13	50.5438	-0.839937	0.00213616	0.00754595
HAUS4	503.548	-0.839684	5.17978e-09	5.45028e-08
RAD54L	132.916	-0.839683	0.000170701	0.000799219
BCDIN3D-AS1	54.7785	-0.839508	0.00154393	0.00567678
LINC01270	87.5545	-0.836986	0.000248488	0.00112231
TRAF3IP2	986.442	-0.836197	1.14557e-14	2.30937e-13
FAM86DP	58.8192	-0.835487	0.00160729	0.00588007
SNX10	7405.7	-0.834518	3.91249e-19	1.15434e-17
TBC1D2	32.7866	-0.83446	0.00944193	0.0275232
NHP2	1135.88	-0.83435	1.52753e-11	2.2109e-10
RPS12	121344	-0.83408	6.31094e-11	8.43097e-10
ALPK1	132.25	-0.833885	2.27454e-05	0.000130982
RGS1	695.108	-0.833399	8.99315e-11	1.17767e-09
SASS6	4010.93	-0.831986	3.55506e-15	7.45539e-14
CKS2	37406.7	-0.831746	2.73866e-10	3.41746e-09
PTPN2	1468.56	-0.830373	2.8513e-14	5.51163e-13
NMD3	11065.7	-0.830203	1.15192e-13	2.09343e-12
ECE1	188.5	-0.829765	0.00114369	0.00436255
EMC3-AS1	49.3772	-0.82652	0.00766222	0.0228893
FAM133A	188.804	-0.826317	1.76987e-05	0.000104395
CKLF	1347.79	-0.826045	5.85339e-13	1.00368e-11
WDR27	44.7118	-0.825979	0.00331434	0.0111049
MLLT4-AS1	71.6282	-0.825576	0.000840279	0.00331539
HAUS6	5095.91	-0.825165	1.40832e-20	4.63346e-19
RPS3	29217	-0.824532	1.26689e-08	1.26646e-07
DTNA	852.907	-0.823755	3.49022e-11	4.84015e-10
RPS27A	205845	-0.823689	1.44921e-08	1.43591e-07
HPRT1	4408.26	-0.823058	3.7531e-22	1.37441e-20
WBP4	735.773	-0.822749	1.87988e-07	1.60136e-06
EFCAB7	2896.99	-0.822669	4.51428e-16	1.02009e-14
SOSTDC1	121.853	-0.821336	4.14385e-05	0.000222948
ZNF595	388.92	-0.821284	6.65231e-10	7.87631e-09
MARCH1	60.9171	-0.819028	0.00214176	0.00756206
GTPBP10	2627.97	-0.818963	1.00776e-15	2.20873e-14
EIF3M	28240.8	-0.818687	2.44512e-17	6.24127e-16
PDE7B	128.632	-0.818382	8.49871e-05	0.000425373
NDUFV2	14944.1	-0.818297	3.28263e-17	8.26327e-16
RPS7	157761	-0.818261	3.16729e-12	4.95845e-11
ZFP69	36.3182	-0.816802	0.0102542	0.0295424
FANCI	4181.49	-0.816346	1.08152e-15	2.36329e-14
ESCO1	3842.51	-0.815823	6.8384e-17	1.66394e-15
GLIPR1	26.5776	-0.815142	0.01652	0.044564
GLRX3	6905.51	-0.81412	1.66272e-17	4.34305e-16
PRTG	1650.48	-0.813915	6.55975e-14	1.22575e-12
CSE1L	13188.6	-0.813588	1.0129e-19	3.14107e-18
KTN1-AS1	128.368	-0.8118	1.93628e-05	0.000113112
RPS15A	217895	-0.811368	3.47823e-08	3.27277e-07
ZNF544	72.7449	-0.810984	0.00145632	0.00538865
IFI35	178.728	-0.810623	3.43127e-06	2.33151e-05
TNRC6C-AS1	182.054	-0.810565	1.21958e-05	7.44989e-05
PDGFD	1068.46	-0.810538	9.45727e-14	1.7426e-12
NDUFAF2	3190.3	-0.810226	9.77528e-11	1.2778e-09
SLC38A2	8284.22	-0.809731	7.96963e-21	2.69507e-19
CDKN2A	431.421	-0.809404	3.64478e-10	4.44677e-09
STMN3	87.9883	-0.809161	0.000446944	0.00189808
GOLGA6L10	64.7516	-0.808611	0.00287736	0.00978742
CDCA7L	758.655	-0.808501	1.35801e-08	1.35198e-07
MAK	26.7903	-0.807893	0.0182712	0.0484979
TRIQK	5754.58	-0.807873	1.37573e-16	3.23929e-15
LARP7	3654.61	-0.807761	1.01287e-07	8.93617e-07
OSBPL6	32.1616	-0.807502	0.0107911	0.0308999
SNX5	6021.99	-0.807451	2.38423e-20	7.72226e-19
INADL	204.522	-0.806476	6.29211e-06	4.05378e-05
EFCAB11	691.881	-0.805659	3.32629e-09	3.58851e-08
FGGY	45.7481	-0.805614	0.00406445	0.0132645
PLSCR1	31262.6	-0.805477	3.92726e-25	1.84644e-23
MCOLN2	256.566	-0.80486	1.60146e-07	1.37707e-06
APOLD1	8695.63	-0.804753	7.30186e-18	1.94205e-16
PAGE5	346.256	-0.804703	3.14818e-07	2.5836e-06
RPL17-C18orf32	656.889	-0.804692	1.06413e-06	8.04447e-06
PPFIBP1	478.093	-0.803782	3.62803e-11	5.00903e-10
PDGFC	373.51	-0.803311	4.20772e-09	4.47646e-08
SMIM19	1735.64	-0.802494	2.86574e-10	3.55473e-09
AMIGO2	694.418	-0.802402	2.32354e-08	2.23241e-07
KHDRBS3	820.649	-0.801376	6.3299e-09	6.57579e-08
CCDC112	626.743	-0.800944	5.75354e-10	6.87924e-09
PPA1	17960.8	-0.800263	2.26303e-17	5.7866e-16
CWC15	8200.2	-0.799808	5.62899e-15	1.16538e-13
RNASEH1-AS1	75.3232	-0.799574	0.00161386	0.00589821
EIF4A1	9886.85	-0.798098	5.68477e-08	5.20449e-07
CPSF3	4384.04	-0.797793	2.38538e-13	4.21929e-12
UCK2	838.232	-0.797262	1.15977e-11	1.70545e-10
ARHGAP29	5300.78	-0.796416	1.16019e-16	2.76304e-15
NPL	2313.8	-0.796303	2.77766e-14	5.37642e-13
PIGL	72.5088	-0.795559	0.00123634	0.00467316
METTL18	1872.23	-0.795409	3.58171e-15	7.50049e-14
EAF2	643.959	-0.794983	1.42533e-12	2.32634e-11
KIAA1804	138.565	-0.794676	1.82059e-05	0.000107126
APRT	372.914	-0.794094	2.58968e-06	1.80769e-05
ATP1A1-AS1	126.839	-0.792912	0.000148819	0.000706755
IFITM3	679.208	-0.7923	5.60337e-12	8.51608e-11
BVES-AS1	47.4482	-0.792194	0.00503817	0.0159253
MRPL42	14696.5	-0.791796	6.34638e-18	1.69722e-16
ZNF581	97.167	-0.791426	0.0008622	0.0033927
TNNT1	42.6846	-0.790831	0.00565495	0.0176113
CCT8	24187.5	-0.790354	1.43237e-07	1.23678e-06
LOC81691	220.932	-0.789723	4.93932e-07	3.95988e-06
NPAT	1965.58	-0.789485	5.97028e-17	1.46001e-15
ZNF280A	82.444	-0.78898	0.00117402	0.00447005
POU3F2	908.543	-0.788858	1.06297e-13	1.93659e-12
MEX3C	2582.24	-0.787041	2.9152e-10	3.60076e-09
RAD18	1296.09	-0.78627	2.79366e-12	4.39715e-11
UBL7-AS1	121.521	-0.78578	7.59571e-05	0.000383204
LINC00601	29.4477	-0.785754	0.0141541	0.0390491
RPS14	46432.2	-0.785739	1.72922e-14	3.4151e-13
DARS	4518.11	-0.78462	4.01487e-11	5.49969e-10
ZNF829	95.674	-0.784348	0.000329547	0.00144629
SYNJ1	5235.45	-0.783531	3.13058e-11	4.36634e-10
ART3	218.561	-0.782124	5.05929e-06	3.33661e-05
SLC2A1-AS1	179.144	-0.782095	1.12924e-05	6.93874e-05
ZC3H6	195.465	-0.781997	1.37121e-06	1.01294e-05
BRIX1	10908.7	-0.781269	6.19146e-18	1.66189e-16
SPAG4	61.4506	-0.780942	0.00188941	0.00678614
C9orf85	1648.19	-0.780931	1.29838e-13	2.3508e-12
WDR54	316.65	-0.780747	6.32214e-08	5.74471e-07
LOC100506083	44.7221	-0.779905	0.00738054	0.0221842
LOC100130691	46.3945	-0.778638	0.00629508	0.0193038
PPM1H	3886.83	-0.777704	2.15766e-17	5.52688e-16
RNASET2	142.746	-0.776472	2.94933e-05	0.000165111
RPL19	79849.2	-0.776111	2.08448e-13	3.71409e-12
TP53TG1	237.983	-0.775584	6.98696e-07	5.44863e-06
NDC1	4202.62	-0.775324	1.09846e-16	2.62029e-15
PUS7	638.465	-0.775161	4.05769e-10	4.94075e-09
CEP112	2067.13	-0.774031	5.13761e-08	4.72135e-07
DUSP10	405.365	-0.773576	1.16417e-06	8.72828e-06
INTS6-AS1	102.124	-0.773569	0.000225086	0.00102488
RPL18A	30268.6	-0.771546	4.52641e-16	1.02124e-14
LRP4	238.576	-0.771208	4.70289e-07	3.77865e-06
ZNF658B	57.2236	-0.77051	0.00315202	0.0106221
POLR1D	15412.1	-0.770115	1.04965e-15	2.29709e-14
SGOL1	914.807	-0.768881	4.16781e-13	7.23165e-12
LTA4H	2616.81	-0.768642	1.17784e-12	1.95302e-11
LOC644656	69.8788	-0.768452	0.0038922	0.0128114
CWF19L2	747.291	-0.768392	1.75753e-07	1.5024e-06
EEF1B2	18025.1	-0.767627	1.20815e-14	2.42546e-13
PAWR	158.335	-0.767052	0.000166277	0.00078177
C11orf82	1572.32	-0.766463	8.36042e-14	1.5444e-12
DYM	935.85	-0.766202	2.15496e-11	3.07325e-10
MCM3AP-AS1	56.3928	-0.766089	0.00414673	0.0134968
FAM222B	662.149	-0.766007	1.12334e-09	1.2953e-08
GALE	531.501	-0.76514	4.16571e-10	5.06382e-09
CASC9	401.1	-0.763413	1.84252e-07	1.57229e-06
ZNF608	388.963	-0.76327	4.02284e-08	3.75371e-07
LINC01355	253.445	-0.762747	9.62342e-07	7.33201e-06
C1orf21	1678.36	-0.762554	1.85899e-11	2.66944e-10
CCNB2	4863.91	-0.762325	1.91202e-13	3.42354e-12
LOC80154	41.351	-0.762109	0.0107878	0.0308966
ZWILCH	4675.65	-0.760361	2.74429e-10	3.42156e-09
DCAF13	7559.74	-0.759546	3.63189e-13	6.32435e-12
GPX4	1472.79	-0.759386	5.1579e-10	6.19756e-09
NBPF11	85.5425	-0.758574	0.00939795	0.0274279
MRPL48	4861.62	-0.758031	4.83359e-15	1.00213e-13
CNOT10	738.347	-0.757949	5.78333e-09	6.05546e-08
TBC1D15	7166.06	-0.757878	5.01722e-12	7.68131e-11
ACTL6A	8508.89	-0.757798	1.02116e-10	1.33125e-09
TRIM65	92.0564	-0.75752	0.00156153	0.00572994
G2E3	1166.28	-0.757105	3.59273e-11	4.96812e-10
FAM72A	534.492	-0.755155	2.2263e-06	1.57746e-05
THOC3	203.995	-0.754632	0.000860692	0.00338768
ORC3	4122.65	-0.754257	1.50702e-14	2.99656e-13
SNHG6	20331.4	-0.753797	1.04958e-07	9.23772e-07
SOX5	134.221	-0.753787	0.000150941	0.000715903
GART	2493.14	-0.75332	2.13871e-16	4.97949e-15
ASB13	67.6336	-0.753185	0.00260239	0.00897111
TRIP10	73.8364	-0.752217	0.00198459	0.00708275
SGK1	8835.15	-0.752154	1.41576e-21	4.98423e-20
OSBPL3	322.414	-0.751461	2.36811e-07	1.98363e-06
PNPT1	3323.45	-0.750643	1.48533e-14	2.95748e-13
PTX3	44.08	-0.750397	0.00973884	0.0282419
RPS20	149157	-0.749987	1.20944e-08	1.21152e-07
SNHG3	9313.36	-0.748859	4.56988e-15	9.48803e-14
CLIP4	84.0532	-0.748535	0.000715967	0.00287313
TRIM62	106.987	-0.747946	0.003187	0.0107251
SRGAP1	176.39	-0.747347	7.45742e-06	4.7551e-05
WDR89	771.996	-0.746937	2.74731e-06	1.90676e-05
ZNF441	269.517	-0.746569	4.74672e-05	0.000251576
ST3GAL6-AS1	450.418	-0.746097	3.22417e-09	3.48866e-08
EEF1A1	413821	-0.746005	5.16452e-10	6.2004e-09
EIF2S3	12275.8	-0.745879	1.24733e-15	2.69731e-14
CWC27	1681.29	-0.745566	2.55914e-07	2.13261e-06
CTNNAL1	3169.85	-0.74548	2.40223e-14	4.71231e-13
OTUD6B	2224.81	-0.744262	4.0416e-09	4.31232e-08
GPSM3	64.6639	-0.744118	0.00233622	0.00814797
CASC5	343.939	-0.743873	6.2091e-05	0.000320232
POC5	987.88	-0.742889	6.24266e-10	7.41538e-09
TMC6	292.71	-0.742387	0.000172707	0.000807572
TSEN2	286.332	-0.742239	2.35719e-06	1.66051e-05
EXOSC2	470.67	-0.741635	8.14502e-07	6.27782e-06
RPS5	18018.7	-0.741584	3.95314e-11	5.42532e-10
GNB2L1	23062.7	-0.741467	1.47467e-10	1.88373e-09
DCLRE1A	1392.35	-0.740846	7.72945e-14	1.43695e-12
PRDX6	9379.1	-0.74046	1.85853e-12	3.00644e-11
GNPNAT1	1488.88	-0.740358	4.63269e-14	8.81482e-13
KCNQ1OT1	415.837	-0.739633	0.000208877	0.00095886
AEBP1	64.7623	-0.739527	0.00278649	0.0095291
BTF3	58822.4	-0.739404	8.10177e-18	2.14307e-16
IARS	7384.16	-0.73917	8.45932e-13	1.42044e-11
KNTC1	2817.89	-0.738814	3.45048e-17	8.62621e-16
RPS11	75803.5	-0.738581	1.51948e-12	2.47445e-11
RB1CC1	7451.66	-0.73841	2.08354e-12	3.3371e-11
ZNF267	3561.12	-0.738107	3.65511e-16	8.31095e-15
LIFR	66.0206	-0.737939	0.0048395	0.0153886
TDP1	272.023	-0.73784	4.50391e-06	3.00295e-05
ODC1	4079.63	-0.736839	3.22441e-15	6.7815e-14
TSPAN14	994.183	-0.736123	1.02085e-12	1.70044e-11
MCF2L2	50.818	-0.735552	0.00640165	0.0195729
KIAA1551	524.809	-0.735443	2.85407e-09	3.11841e-08
HAUS1	5744.41	-0.735179	4.40952e-17	1.09487e-15
SEMA3A	666.714	-0.73513	9.13872e-10	1.06218e-08
NTN1	51.0113	-0.734914	0.0173039	0.0463525
ZNF681	160.103	-0.73466	7.33311e-05	0.000371241
LINC00669	287.637	-0.734421	1.03623e-06	7.85394e-06
SYNGR2	89.4587	-0.734419	0.00336253	0.0112586
U2SURP	11303.1	-0.73422	1.42964e-17	3.76118e-16
PTPRG	224.77	-0.733465	5.45314e-06	3.56251e-05
GLB1L2	67.1427	-0.733122	0.00448179	0.0144199
MR1	136.317	-0.732299	0.000189439	0.000878483
NOP58	6359.69	-0.731781	4.67586e-08	4.32115e-07
TTC28-AS1	1940.66	-0.731423	2.36669e-07	1.98359e-06
NUP210	426.745	-0.731301	6.32497e-05	0.000325862
TTC39B	145.889	-0.731228	0.000135964	0.000649516
AMDHD1	41.0365	-0.730554	0.0150354	0.0411533
SATB1	269.097	-0.730456	1.59952e-06	1.16101e-05
MPP6	363.315	-0.730429	9.84504e-06	6.09824e-05
FHL1	329.335	-0.730105	1.3735e-07	1.18877e-06
RPL3	22500.3	-0.729536	2.72815e-10	3.40726e-09
POLR2D	316.723	-0.72852	9.31467e-07	7.10792e-06
NCK1-AS1	306.407	-0.728509	2.6147e-06	1.82341e-05
LYRM4	2054.77	-0.727436	6.63145e-12	9.99518e-11
UPP1	1093.31	-0.72723	1.29384e-11	1.88767e-10
GKAP1	281.59	-0.727173	5.84251e-05	0.000303582
ZRANB2-AS2	86.1127	-0.72713	0.0011114	0.00424826
MAK16	1694.91	-0.726828	3.5121e-11	4.86123e-10
SAMD13	148.282	-0.726619	7.04992e-05	0.000359149
CKS1B	13845	-0.726602	1.57922e-16	3.70049e-15
NPHP1	502.408	-0.726589	6.01473e-06	3.90141e-05
TMED7-TICAM2	55.5393	-0.726272	0.0135729	0.03776
INO80B	37.3287	-0.726132	0.0183232	0.0486007
MEX3A	53.7025	-0.724783	0.00710243	0.0214412
FOPNL	4447.24	-0.724393	1.40633e-16	3.30601e-15
GALNT7	1362.95	-0.723687	1.71174e-09	1.92802e-08
LOC100507462	81.7806	-0.72351	0.00143387	0.00531501
RPL37	286485	-0.723126	0.00653954	0.0199401
NSA2	15435.4	-0.721807	3.17408e-10	3.90398e-09
KIAA1524	2098.87	-0.721016	5.2142e-12	7.95993e-11
NUP107	4460.1	-0.720411	3.15872e-12	4.95569e-11
CHD2	816.357	-0.720382	2.85614e-09	3.11841e-08
RPS27	212590	-0.720062	0.017407	0.0465603
ATIC	4501.32	-0.720056	1.06568e-10	1.38433e-09
HMGA1	594.378	-0.72003	5.21137e-05	0.000273813
ARL14EP	2796.41	-0.719712	2.36924e-09	2.61604e-08
PIAS1	937.731	-0.719416	1.56562e-06	1.1381e-05
RAB31	1363.02	-0.718901	1.09817e-12	1.82299e-11
PRMT3	1818.83	-0.718629	9.79776e-14	1.79626e-12
PHF10	425.794	-0.718623	1.29278e-07	1.12357e-06
HSF2	1776.46	-0.717014	2.00584e-09	2.23853e-08
HAUS7	90.7911	-0.716352	0.00589416	0.0182665
GSE1	272.014	-0.715214	3.38399e-06	2.30368e-05
PTER	1875.16	-0.71507	1.05539e-13	1.9276e-12
LOC100270804	77.8784	-0.715041	0.00378752	0.0124972
CEP57	5154.99	-0.715008	2.19684e-15	4.66747e-14
QSOX2	273.747	-0.71491	4.01798e-06	2.69498e-05
G3BP2	9365.91	-0.714905	1.23829e-15	2.68173e-14
TMEM116	245.298	-0.713921	1.32357e-06	9.80737e-06
MAP1B	1305.56	-0.71348	2.66407e-11	3.76613e-10
LOC100506844	1774.26	-0.713476	7.13212e-13	1.20873e-11
CNTRL	916.837	-0.713301	5.88093e-09	6.14441e-08
PINX1	211.69	-0.713288	0.000310815	0.00137402
RPL41	185557	-0.713178	2.67174e-07	2.21884e-06
LOC102467073	237.131	-0.712849	1.68211e-05	9.97425e-05
SSB	14549.2	-0.712215	8.91238e-07	6.82044e-06
HIF1A	9013.12	-0.711902	1.62753e-06	1.17899e-05
MYC	5051.99	-0.711452	1.04797e-05	6.45567e-05
USP16	3925.85	-0.710842	5.0327e-10	6.05211e-09
DENND4A	736.751	-0.710535	3.73485e-11	5.14027e-10
CEP162	1053.03	-0.710331	8.39679e-09	8.55827e-08
MGC57346	248.841	-0.710063	4.50742e-06	3.00392e-05
TCEB3-AS1	746.158	-0.710011	2.05677e-09	2.2901e-08
IMPDH2	2487.51	-0.709851	6.50788e-12	9.82926e-11
CDKN2B	245.564	-0.709045	9.14384e-06	5.71288e-05
AURKB	948.133	-0.70896	2.45487e-07	2.05277e-06
ZNF426	99.9735	-0.708816	0.000752259	0.00300388
MAPK12	47.1643	-0.707912	0.00944935	0.0275393
METAP1	2070.21	-0.707648	5.65276e-12	8.58219e-11
SSX2IP	3704.73	-0.707297	2.65944e-14	5.16819e-13
TARS	12668.7	-0.707262	3.2296e-11	4.49154e-10
SSPN	65.0936	-0.706618	0.00428285	0.0138655
KCNJ2	56.4607	-0.706545	0.0178349	0.0475403
FRG1	5391.83	-0.70632	2.87509e-10	3.56027e-09
CCDC28A	997.527	-0.705939	2.77253e-10	3.45086e-09
LHFPL3	110.971	-0.705801	0.00653408	0.0199318
CENPN	8070.11	-0.705684	7.28806e-13	1.23372e-11
ZNF791	91.8685	-0.705282	0.00218669	0.00770018
RPS10	58296.4	-0.705176	3.63942e-11	5.0184e-10
IGFBP2	280.415	-0.704791	3.6198e-06	2.44366e-05
MRPS17	2090.77	-0.704348	1.59659e-09	1.80902e-08
TIPIN	5189.75	-0.703948	1.48768e-10	1.89868e-09
BCAS3	1334.21	-0.703778	8.67845e-09	8.82683e-08
GLB1L	58.4116	-0.703205	0.00707701	0.0213777
IQCK	1214.34	-0.702677	6.03021e-13	1.03279e-11
AFMID	301.618	-0.702506	1.39374e-06	1.0275e-05
ASCC1	1518.38	-0.702187	2.26784e-07	1.90402e-06
WDR35	1347.07	-0.70208	8.74217e-11	1.14584e-09
TMEM251	4383.99	-0.701058	2.23737e-16	5.20091e-15
LOC101928020	60.6739	-0.700399	0.00563211	0.0175477
PLP2	525.08	-0.70002	9.23949e-08	8.20631e-07
NEIL3	649.683	-0.698909	1.21486e-09	1.39313e-08
CTDSPL2	3818.11	-0.698219	2.59912e-11	3.68504e-10
TRMT10A	1134.53	-0.697566	1.79234e-08	1.7509e-07
PIH1D1	314.73	-0.696109	6.51993e-05	0.000335077
VCX3A	455.918	-0.696088	0.000484643	0.00203916
CENPC	895.383	-0.696038	7.2806e-09	7.47357e-08
CTSH	401.271	-0.695906	1.81839e-06	1.30557e-05
RPLP0	51273.8	-0.695102	4.19081e-12	6.47044e-11
DACH1	327.725	-0.695083	2.94209e-06	2.03131e-05
NUP155	2632.68	-0.694934	3.99768e-14	7.62646e-13
ZNF192P1	169.5	-0.694817	0.000198312	0.000913916
KDM7A	216.032	-0.694423	4.50289e-05	0.000239704
LRRC23	73.484	-0.694193	0.00388274	0.0127889
PHF6	3230.11	-0.694005	2.90774e-16	6.67407e-15
ZNF525	53.1062	-0.693966	0.0105658	0.0303202
FAM212B	49.7978	-0.693515	0.0145853	0.040034
ANKRD23	74.6813	-0.693355	0.00551426	0.0172173
ARG2	458.794	-0.693311	2.41945e-08	2.31084e-07
GDI2	7390.39	-0.692722	3.16043e-07	2.5898e-06
GLTSCR2	665.593	-0.692697	4.2343e-06	2.83096e-05
SUGCT	449.529	-0.692309	5.13589e-06	3.37949e-05
PROM1	384.547	-0.692261	8.46918e-07	6.50703e-06
RNF169	246.739	-0.691874	0.00010517	0.000516635
FOXO1	412.005	-0.691701	2.13153e-07	1.7989e-06
CCRN4L	51.232	-0.691384	0.0142312	0.0392042
TMEM123	8954.49	-0.690892	2.18534e-13	3.8843e-12
SLC4A7	3315.4	-0.690686	1.32088e-10	1.6962e-09
TBC1D31	906.013	-0.69015	1.36427e-08	1.35636e-07
INPP5B	303.555	-0.689384	1.10427e-05	6.79388e-05
TMEM192	567.421	-0.689155	1.87536e-06	1.34383e-05
RPS14P3	45.7585	-0.688887	0.017768	0.0473955
DBF4	4282.46	-0.688268	6.08282e-11	8.14313e-10
C5orf28	4449.12	-0.687866	5.91315e-09	6.17365e-08
BLZF1	1071.55	-0.687484	8.59764e-05	0.000429587
THYN1	1307.33	-0.687178	1.49213e-07	1.28609e-06
C5orf34	2011.98	-0.686859	2.06503e-13	3.68846e-12
MTRNR2L9	36611.3	-0.686383	5.04352e-11	6.83173e-10
HEXB	3511.04	-0.685876	1.05778e-11	1.56519e-10
OARD1	1489	-0.685819	2.3673e-08	2.27145e-07
ZNF138	2273.3	-0.684792	1.93852e-12	3.12543e-11
RAB17	149.351	-0.684571	0.00148176	0.00547026
ZNF420	226.862	-0.68457	0.000268048	0.0012032
RLN1	54.5599	-0.684416	0.0133331	0.0371922
DDX18	4283.64	-0.683943	2.13284e-09	2.37118e-08
CNRIP1	159.558	-0.683784	0.00029749	0.00131871
MGC16275	78.0775	-0.683642	0.00501597	0.0158654
SPATA13	423.424	-0.68327	8.36775e-08	7.48221e-07
POLK	1400.55	-0.683124	7.96501e-11	1.0468e-09
AGAP3	251.332	-0.682879	2.0622e-05	0.000119891
C20orf26	2561.96	-0.682841	2.33105e-08	2.23815e-07
BUD31	3284.67	-0.682809	9.31889e-11	1.21924e-09
RNASEH2B	2155.92	-0.681955	5.70159e-11	7.68173e-10
CEP120	1220.32	-0.681251	2.83263e-11	3.96977e-10
MFHAS1	129.84	-0.680928	0.00596282	0.0184362
RPS13	116411	-0.680751	2.29696e-08	2.20833e-07
CLYBL	475.393	-0.680314	2.65208e-06	1.84683e-05
C9orf9	44.6208	-0.680246	0.0160749	0.0435567
CDC123	1796.05	-0.6802	1.15286e-06	8.66134e-06
DYNLT3	9594.7	-0.680091	2.90015e-13	5.08049e-12
ZNF844	71.3387	-0.679601	0.00521722	0.01642
COG5	1907.38	-0.678388	1.5682e-13	2.82179e-12
SLC31A1	3499.44	-0.678042	4.94939e-08	4.56277e-07
RPL18	10539	-0.677822	1.47055e-09	1.67056e-08
DYNC2H1	689.718	-0.677744	2.77122e-08	2.62959e-07
EEA1	5462.2	-0.677294	1.25222e-10	1.61086e-09
STXBP2	64.2734	-0.677137	0.00966381	0.0280634
WDR74	168.884	-0.676864	0.000188538	0.000874861
RPS21	68161.5	-0.675911	2.89799e-05	0.000162705
RPAP3	2266.09	-0.675272	3.52478e-09	3.78862e-08
CCDC109B	110.657	-0.675205	0.00156304	0.00573403
ZNF124	114.462	-0.674367	0.000700961	0.00282458
SNRPD2	20852	-0.673634	1.67015e-09	1.88409e-08
NSMCE1	2003.8	-0.67201	3.1063e-08	2.93684e-07
NEAT1	20295.9	-0.671911	8.58792e-17	2.07233e-15
MYNN	2045.17	-0.671481	1.67603e-08	1.64499e-07
ZNF551	88.4887	-0.671388	0.003403	0.0113654
METTL2A	584.98	-0.671069	1.93832e-06	1.38553e-05
SLC35A5	2018.25	-0.670794	1.37806e-09	1.57161e-08
TMEM194B	577.489	-0.670682	8.75377e-08	7.7939e-07
CLNS1A	4363.68	-0.670264	2.18566e-10	2.7581e-09
GTF2H3	1444.11	-0.669694	9.2118e-12	1.36584e-10
DSCC1	2266.55	-0.669463	6.5628e-12	9.90195e-11
CDK6	1278.35	-0.669018	5.88516e-10	7.01933e-09
LINC00462	670.674	-0.667755	1.37802e-07	1.19197e-06
FAM102B	4874.77	-0.667371	2.70006e-11	3.80962e-10
GRAMD1A	82.9782	-0.667089	0.017711	0.0472693
RFC3	8662.02	-0.666739	3.14013e-12	4.93183e-11
CACHD1	687.01	-0.665792	6.91769e-08	6.25856e-07
ZSCAN16	195.896	-0.665499	0.000538278	0.00224218
CCDC138	914.99	-0.664961	9.76948e-10	1.13368e-08
GMPS	5742.13	-0.663797	1.3068e-09	1.49503e-08
HCCAT5	805.197	-0.662909	7.21022e-07	5.60774e-06
RPL27	199087	-0.662815	1.65025e-08	1.62078e-07
C1GALT1	4243.37	-0.66244	5.99513e-14	1.13039e-12
TPK1	121.709	-0.66221	0.00217603	0.00766817
SNAPC5	720.02	-0.662189	4.6374e-05	0.00024605
NCEH1	1541.67	-0.661784	5.44765e-12	8.30539e-11
RPL36	15127.1	-0.661615	1.39267e-06	1.02723e-05
CPVL	6369.1	-0.661401	3.16627e-12	4.95845e-11
HEIH	450.15	-0.661384	3.54079e-07	2.88469e-06
RPS4Y1	22271.2	-0.660771	1.01406e-07	8.94125e-07
ABLIM1	3128.3	-0.660474	4.29106e-10	5.20318e-09
NEK7	7765.19	-0.66016	1.67335e-10	2.12819e-09
CREBRF	1150.36	-0.659937	7.41546e-12	1.11308e-10
ZBTB6	833.237	-0.659037	3.95712e-07	3.19884e-06
SPDL1	2572.79	-0.658099	2.23438e-07	1.87809e-06
KDM1B	1692.88	-0.65808	1.05446e-10	1.37099e-09
KCTD20	1858.37	-0.657976	2.4574e-13	4.3414e-12
TGDS	3576.89	-0.65784	5.00759e-11	6.78936e-10
HAT1	23118	-0.657505	6.49206e-09	6.72985e-08
LRIF1	3042.45	-0.656865	5.80438e-10	6.92865e-09
MT2A	1107.09	-0.656415	0.000118511	0.000573855
MTRNR2L8	40071.5	-0.656246	1.27764e-10	1.64211e-09
ALG11	677.726	-0.656242	5.3388e-07	4.25208e-06
MRPL45	3957.81	-0.656094	8.53336e-08	7.61565e-07
RPAIN	2593.51	-0.656014	2.38966e-11	3.39798e-10
WBSCR22	634.376	-0.655708	0.000606502	0.00248727
IPO7	9926.7	-0.655469	1.72729e-14	3.4151e-13
ZNF92	3233.1	-0.655149	1.9534e-13	3.49335e-12
LOC644919	412.698	-0.654511	7.01652e-05	0.000357823
MSN	2649.16	-0.654267	1.5974e-09	1.80902e-08
DDX19B	256.104	-0.653665	0.000373856	0.00161882
ZCRB1	4658.16	-0.65303	2.17482e-08	2.1006e-07
RTKN2	1492.75	-0.652357	7.82436e-12	1.16725e-10
KIAA1147	218.533	-0.651637	2.43172e-05	0.000138935
PTPN12	6299.16	-0.651241	8.36194e-12	1.24363e-10
FUBP1	1932.74	-0.650994	4.45354e-07	3.58621e-06
PLCXD1	275.53	-0.650823	1.50007e-05	9.01157e-05
MZT1	10994.6	-0.650046	7.36387e-11	9.73942e-10
PDK1	1140.82	-0.649891	5.91101e-10	7.03865e-09
SCFD1	4828.46	-0.649491	1.07899e-08	1.08607e-07
STEAP1B	832.275	-0.649359	2.55517e-07	2.13053e-06
HERC5	894.756	-0.649326	2.0499e-07	1.73503e-06
RAD54B	2090.83	-0.648656	1.04961e-08	1.05796e-07
ELP2	1157.27	-0.648545	1.95212e-07	1.65612e-06
RGPD8	110.201	-0.648493	0.0121548	0.0342663
GTPBP2	1162.42	-0.64763	3.55471e-09	3.81798e-08
ACTR6	8111.11	-0.646486	6.39135e-10	7.57349e-09
RGS2	794.206	-0.646362	1.05065e-07	9.23819e-07
CIR1	1266.61	-0.646254	2.86937e-05	0.000161284
ZNF695	197.269	-0.646093	0.000139662	0.000666527
FBXO48	263.405	-0.643313	3.95959e-05	0.000214061
ZNF845	402.866	-0.641698	2.11241e-05	0.000122565
NCAPG	6555.09	-0.641425	1.90067e-12	3.0678e-11
ABCE1	12699	-0.641358	1.06242e-11	1.56887e-10
CMTM8	222.034	-0.640822	0.000449367	0.00190674
RARS2	1978.6	-0.639969	1.46071e-07	1.25975e-06
CDKN3	4435.78	-0.639535	1.8328e-09	2.05801e-08
TMEM69	5183.43	-0.639215	1.44635e-06	1.05986e-05
PAIP2B	146.464	-0.639158	0.00131201	0.00493105
AMZ2	5845.02	-0.639013	3.02282e-15	6.3667e-14
CPOX	4869.56	-0.638101	2.158e-08	2.08711e-07
PHC1	427.533	-0.637928	1.60101e-05	9.53604e-05
LYRM9	54.7683	-0.637901	0.0145974	0.0400598
RNF138	3742.88	-0.637776	2.52987e-12	3.99922e-11
PLEKHO1	99.8493	-0.636098	0.00390322	0.012839
PCID2	1689.57	-0.636075	2.63877e-08	2.51045e-07
PCCA	5025.88	-0.63583	4.00234e-08	3.73697e-07
LBR	4511.53	-0.635745	5.85005e-11	7.86572e-10
UFSP2	1108.63	-0.634934	1.90077e-06	1.3607e-05
LOC400927	85.3668	-0.634882	0.00711887	0.0214819
EOGT	1808.31	-0.634806	5.99001e-07	4.73451e-06
OGFRL1	428.785	-0.634624	2.37791e-05	0.000136235
SUV39H2	1663.34	-0.634618	4.44419e-08	4.11787e-07
NFE2L3	504.527	-0.633948	2.12073e-06	1.50705e-05
TAF1A-AS1	179.235	-0.633924	0.000168808	0.000791627
CECR2	177.322	-0.633468	0.00077052	0.00306924
ZBTB8A	348.584	-0.633432	2.23262e-06	1.5804e-05
MNAT1	3456.47	-0.633286	3.67045e-09	3.93938e-08
ABCB7	1157.63	-0.63326	2.513e-09	2.7643e-08
RAD51AP1	4162.15	-0.633148	2.64961e-09	2.90361e-08
FER	347.298	-0.632719	6.14803e-05	0.000317645
GCA	1497.12	-0.632551	7.59637e-11	1.00106e-09
C19orf48	272.735	-0.632513	2.58639e-05	0.000146965
EIF3L	16450.1	-0.632227	1.70432e-09	1.92115e-08
NUP88	1045.63	-0.63213	4.64148e-09	4.91283e-08
GCC2	1408.7	-0.632075	9.87529e-11	1.28972e-09
LPAR6	43633.2	-0.63197	1.8451e-12	2.98803e-11
MTAP	1946.41	-0.631826	8.57664e-12	1.27426e-10
HSDL2	1545.53	-0.631607	1.10507e-07	9.67355e-07
PYROXD1	1464.67	-0.631343	2.93533e-05	0.000164491
F11R	243.519	-0.631051	4.51379e-05	0.000240192
LZIC	3818.32	-0.631013	2.78893e-08	2.64296e-07
SNRPD1	12695.8	-0.630382	1.1883e-07	1.03585e-06
C1orf27	2441.31	-0.630264	4.23477e-10	5.1392e-09
BCAP29	13125.3	-0.629324	2.43127e-14	4.76288e-13
GLO1	25942.5	-0.628835	1.47627e-08	1.45974e-07
TBL1X	281.926	-0.628692	1.45059e-05	8.74373e-05
SNRNP48	1563.8	-0.628664	1.99537e-11	2.85963e-10
MAD2L1	17470.2	-0.627298	1.10888e-11	1.63252e-10
MTIF2	3046	-0.626636	1.35287e-05	8.18858e-05
CCDC77	397.293	-0.626285	6.77604e-05	0.000347016
NIPAL3	301.219	-0.625941	4.48187e-05	0.000238929
DNPH1	390.23	-0.62435	0.000118326	0.000573324
POLE	277.503	-0.623673	0.000417051	0.00178622
ELL2	307.131	-0.623142	1.52332e-05	9.1293e-05
FGL2	92.139	-0.622918	0.00626116	0.019224
PLCB4	2477.28	-0.622711	2.57623e-09	2.82745e-08
PRKAG1	868.14	-0.622346	0.000904535	0.00353975
HK2	811.938	-0.622146	3.28309e-09	3.54978e-08
EIF2B3	1309.04	-0.6221	1.70187e-05	0.00010071
GINS2	906.463	-0.621997	2.62181e-08	2.49757e-07
ARRB2	88.8935	-0.621456	0.00467402	0.0149427
EFHC1	873.323	-0.621035	1.82604e-09	2.05201e-08
ASUN	2127.43	-0.620902	5.18291e-09	5.45028e-08
LRRC28	518.891	-0.620786	9.55197e-05	0.000473215
RASSF3	6440.14	-0.620508	1.40359e-08	1.39166e-07
RBM34	1790.9	-0.620124	1.56887e-06	1.1399e-05
NEK2	1789	-0.619597	5.58619e-09	5.85325e-08
DRAM1	145.11	-0.619371	0.00174337	0.00632396
C7orf63	91.7411	-0.618517	0.00642942	0.0196496
ANKRD36B	382.906	-0.61843	3.33793e-06	2.27444e-05
MMP16	93.5674	-0.617886	0.00464563	0.014865
NARG2	3879.56	-0.616671	1.94628e-12	3.13102e-11
NUDT6	876.191	-0.616381	1.98889e-06	1.4182e-05
DHX40	4510.58	-0.61602	2.48146e-09	2.7358e-08
MRPL30	5108.29	-0.615846	1.08732e-09	1.25775e-08
TOP1MT	133.435	-0.615633	0.00357713	0.0118817
CALCOCO2	2152.09	-0.61548	2.34148e-07	1.96359e-06
UBAC2	394.243	-0.615258	0.000246827	0.00111516
PPAT	2776.52	-0.615201	1.20508e-08	1.20798e-07
RSPRY1	229.24	-0.615185	0.00147914	0.00546199
NAMPT	7543.94	-0.615162	2.79276e-12	4.39715e-11
RPARP-AS1	73.4634	-0.614935	0.0134661	0.0374916
SNRPB2	14434.7	-0.614495	8.29467e-10	9.68708e-09
FTL	8759.47	-0.614396	1.95502e-08	1.9009e-07
NOB1	298.539	-0.614172	3.37505e-05	0.000185909
STK10	102.538	-0.613793	0.00426828	0.0138306
ASXL2	247.525	-0.613304	0.00588249	0.018242
NOL10	693.097	-0.613146	1.69958e-05	0.000100697
EXOSC1	1432.55	-0.612914	3.10711e-08	2.93684e-07
KCNAB1	220.475	-0.612776	0.00019736	0.00091087
LGALS3	15384.9	-0.611892	5.44554e-09	5.71821e-08
LOC100505683	85.0252	-0.611272	0.00957299	0.0278496
TPD52	6598.92	-0.610931	4.22108e-11	5.7659e-10
PLEKHB1	126.694	-0.610822	0.00125236	0.00472567
STK17A	1643.38	-0.610431	2.88639e-09	3.14183e-08
SNRPA1	2360.16	-0.610193	9.15668e-07	6.99835e-06
TSC22D1	2524.67	-0.610166	1.95233e-12	3.13729e-11
ABI2	2605.4	-0.608947	2.79626e-11	3.92634e-10
ECD	1667.49	-0.608829	9.25063e-08	8.2112e-07
ADAL	1171.25	-0.608504	1.56282e-06	1.1372e-05
SRBD1	962.236	-0.607476	1.67084e-07	1.4325e-06
C11orf1	2288.57	-0.60741	5.66942e-07	4.50064e-06
ZNF766	408.481	-0.606733	6.92585e-05	0.000353446
ZNF33A	296.833	-0.60655	6.23923e-05	0.000321672
ISYNA1	207.418	-0.606472	0.000611998	0.00250628
RPGR	409.447	-0.606137	8.95563e-05	0.000446403
ORC2	437.847	-0.606111	1.03481e-05	6.38136e-05
GSG2	97.1059	-0.605997	0.00772628	0.023057
SRP72	7012.32	-0.605935	1.06923e-12	1.77697e-11
LOC102724933	108.832	-0.605023	0.00274878	0.0094134
STYXL1	276.871	-0.605	0.000828258	0.00327062
GPM6A	186.392	-0.604511	0.00103958	0.00400275
YEATS4	3947.8	-0.604238	3.43818e-10	4.21105e-09
AP1S3	64.6913	-0.603231	0.0144156	0.0396205
GPALPP1	778.245	-0.603008	9.08786e-06	5.68235e-05
NGDN	2500.47	-0.602761	3.44995e-05	0.000189533
NDUFAF7	623.331	-0.602715	6.91444e-07	5.39785e-06
DTWD1	2548.57	-0.600819	2.08572e-09	2.32057e-08
MOB4	11257.5	-0.600816	5.38818e-13	9.26093e-12
INTS12	1437.2	-0.600482	1.17971e-06	8.83117e-06
DNM3	533.101	-0.599722	0.000132036	0.000634078
PPIE	1036.23	-0.599531	3.53972e-05	0.000193952
C10orf118	424.417	-0.599453	4.50299e-05	0.000239704
FKTN	634.487	-0.599381	8.53569e-08	7.61565e-07
GTF3C3	2913.2	-0.59903	1.32698e-08	1.32199e-07
RPL35	22096	-0.598997	2.38614e-05	0.000136652
CHST11	1481.17	-0.598768	1.05451e-09	1.22174e-08
GAB2	465.165	-0.598405	3.71325e-05	0.00020232
ANKRD27	1875.13	-0.597775	5.22937e-11	7.07688e-10
FARP2	542.643	-0.59771	2.83043e-05	0.00015928
KIAA1671	433.443	-0.59725	0.000119657	0.000578828
SLC41A3	350.651	-0.596559	1.16524e-05	7.14189e-05
SEPT7	43440.1	-0.596498	8.64463e-06	5.43084e-05
SEMA5A	11759.7	-0.596474	1.38777e-12	2.26757e-11
TTC12	205.536	-0.595992	0.000611913	0.00250628
TLE4	175.509	-0.595659	0.00038058	0.00164403
TCEA1	12391.4	-0.594948	4.59488e-09	4.87057e-08
LCLAT1	2887.67	-0.594874	2.85632e-09	3.11841e-08
PDCD2L	148.991	-0.594272	0.0125146	0.0351716
C4orf32	316.214	-0.59381	3.40085e-05	0.000187117
MRPL1	4865.47	-0.593534	3.29063e-09	3.55529e-08
ERO1L	3810.65	-0.593526	8.27092e-07	6.36813e-06
ZNF850	151.562	-0.593432	0.000922208	0.00359871
ZBTB25	100.701	-0.593316	0.00595427	0.0184289
ITGA6	998.485	-0.593037	7.6542e-09	7.83426e-08
DDAH1	345.818	-0.592798	3.34486e-05	0.000184525
FSCN1	616.973	-0.592692	0.00118614	0.00450796
PTPN13	3715.28	-0.592155	4.63662e-10	5.5989e-09
SFXN2	133.446	-0.592126	0.00186912	0.00672154
ATXN2L	397.788	-0.591868	0.00379258	0.0125073
CASC2	122.417	-0.591634	0.00209851	0.00743605
SLC16A4	756.637	-0.591423	1.90889e-07	1.62512e-06
EML4	3567.66	-0.59129	1.19748e-07	1.04212e-06
CPD	3819.98	-0.591268	7.48612e-10	8.7992e-09
CEP44	1578.04	-0.591138	7.16048e-10	8.43005e-09
CDC45	897.372	-0.590827	1.53886e-05	9.21483e-05
ME1	177.75	-0.590412	0.00205574	0.00730079
FXR1	10020.4	-0.590309	3.80755e-05	0.000206686
C1orf43	6240.17	-0.590033	1.6272e-10	2.0713e-09
CLUAP1	657.279	-0.589736	5.62688e-05	0.000293844
GPRC5B	699.877	-0.589293	1.1968e-05	7.32301e-05
PPP1R15A	110.314	-0.588972	0.00800516	0.0237725
SFR1	2298.15	-0.588857	3.36433e-10	4.12754e-09
LOC257396	145.748	-0.588826	0.00184826	0.00665637
ADSL	3511.18	-0.588747	1.37348e-08	1.36459e-07
MRPS31P5	126.529	-0.588586	0.00336502	0.0112644
POLA1	898.512	-0.588321	1.12892e-07	9.8704e-07
UBXN1	430.427	-0.588224	0.00155295	0.00570562
TAF12	1311.56	-0.588036	2.37683e-06	1.67273e-05
UBXN8	1362.6	-0.587609	2.64564e-07	2.19967e-06
TMEM106B	7890.58	-0.58568	6.18279e-10	7.35026e-09
XPNPEP1	5593.97	-0.585594	7.38362e-11	9.75669e-10
SEH1L	1195.69	-0.585472	2.56857e-09	2.8233e-08
LRTOMT	84.22	-0.585435	0.0079605	0.0236591
CTAGE5	382.499	-0.585399	3.15835e-05	0.000175631
HIP1	292.759	-0.585183	0.000111371	0.000543616
ZNF195	1398.94	-0.585012	1.09949e-09	1.26881e-08
ROBO1	4163.83	-0.584855	8.19938e-08	7.34969e-07
ZNF616	310.906	-0.584841	0.00254722	0.008808
MTRNR2L2	831097	-0.58482	7.1952e-09	7.39563e-08
WDR76	599.183	-0.584814	3.47199e-06	2.35259e-05
ZNF273	623.955	-0.584797	3.62988e-07	2.95562e-06
MAP9	1494.92	-0.584466	1.60395e-08	1.57957e-07
GTF2F2	5837.6	-0.584447	7.28128e-09	7.47357e-08
TPMT	7926.53	-0.583762	3.02292e-07	2.48922e-06
IFIT5	1664.86	-0.583518	3.48472e-08	3.27464e-07
GABPB1-AS1	99.6164	-0.583166	0.00581659	0.0180645
SUGT1	5929.6	-0.583136	3.98618e-07	3.22055e-06
DNAJC2	1616.12	-0.583077	2.61863e-05	0.000148624
MANBA	445.013	-0.583076	1.6211e-05	9.6439e-05
LINC01278	419.537	-0.582957	1.90785e-05	0.000111675
IFT20	958.894	-0.582649	1.50589e-08	1.48802e-07
MCM8	1154.03	-0.580823	7.7472e-07	5.99657e-06
ZNF460	97.3682	-0.579885	0.00803233	0.0238386
PCED1A	245.121	-0.579724	0.0010248	0.00395354
CHEK1	3376.68	-0.579494	3.2675e-08	3.08245e-07
MTFR2	1730.29	-0.579449	9.40898e-09	9.53122e-08
RNFT2	142.311	-0.57902	0.00428025	0.0138602
THOC2	1101.36	-0.578608	1.25434e-06	9.3323e-06
C3orf17	2217.34	-0.578493	7.39318e-09	7.58309e-08
DNAJC12	1705.96	-0.57782	1.90783e-08	1.85749e-07
FSD2	101.869	-0.577746	0.00535987	0.0168217
KIF9	337.902	-0.577456	0.000243093	0.00109999
ZNF721	983.817	-0.57738	1.76131e-08	1.72289e-07
TP53TG3D	3083.46	-0.577167	2.67101e-10	3.33876e-09
CCDC82	5046.36	-0.576908	2.98301e-06	2.0547e-05
PFDN5	10090.8	-0.576647	7.71714e-07	5.97648e-06
NPM1	122610	-0.576616	2.07057e-05	0.000120329
NPIPA5	128.005	-0.575862	0.00937638	0.0273759
LSM8	11579.9	-0.575714	1.811e-05	0.000106628
PCOLCE2	375.276	-0.575161	0.000172482	0.000806781
TAP2	372.007	-0.574698	1.88117e-05	0.000110245
UACA	3418.94	-0.574023	2.3356e-06	1.6477e-05
ESD	25499	-0.573761	2.00036e-09	2.23412e-08
RPS4X	133162	-0.573042	7.40784e-07	5.74695e-06
C21orf59	867.059	-0.572946	1.42361e-05	8.60246e-05
ZNF519	627.08	-0.571324	6.71982e-06	4.3165e-05
TDRKH	249.972	-0.570942	0.000149523	0.000709636
ECT2	11101.9	-0.570864	4.8042e-11	6.51966e-10
C22orf23	77.1633	-0.570704	0.0150619	0.0412179
WRN	972.924	-0.569516	1.53536e-07	1.32179e-06
RPL15	41551.1	-0.569412	1.15469e-09	1.3283e-08
EPHA5	1796.17	-0.568867	1.10123e-07	9.65146e-07
FBXO25	1696.55	-0.568738	1.55821e-05	9.31922e-05
POLR1C	568.543	-0.568145	0.000455396	0.00193004
ADAT2	374.34	-0.568109	1.45711e-05	8.77213e-05
IPO5	6864.43	-0.567778	3.49467e-11	4.84172e-10
LINC00698	1086.93	-0.567347	6.22788e-06	4.01821e-05
PSME2	1635.96	-0.56731	4.48518e-06	2.99183e-05
CLEC2B	425.918	-0.567203	0.00196562	0.00701872
C1orf112	1305.36	-0.567181	7.48033e-06	4.76303e-05
FOXP1	194.224	-0.566619	0.000567458	0.00234128
POLR3F	1361.21	-0.565905	7.45808e-06	4.7551e-05
NFE2L2	6646.99	-0.56587	8.41382e-09	8.56963e-08
TMEM56	9248.13	-0.565337	6.79421e-09	7.02808e-08
EXTL2	4587.25	-0.564644	3.45468e-10	4.22771e-09
LINC00997	398.211	-0.564639	0.000263783	0.00118516
ELP4	795.344	-0.564606	8.54775e-08	7.61978e-07
C12orf29	2326	-0.564514	4.57909e-10	5.54321e-09
NEO1	279.988	-0.564277	0.000136507	0.000651896
RNF157	78.0843	-0.564247	0.0186706	0.0493694
ZNF675	935.601	-0.563058	5.50329e-08	5.04786e-07
CRYBG3	264.147	-0.562754	0.00507282	0.0160174
EMG1	561.442	-0.562509	5.62117e-05	0.000293651
MED8	1569.75	-0.562484	8.37716e-05	0.000419578
NUB1	887.524	-0.562395	0.000180278	0.000839471
MORN4	271.469	-0.562308	0.000608485	0.002494
BNIP2	7181.33	-0.562278	2.15253e-09	2.39124e-08
POLE2	1525.45	-0.562119	1.51906e-08	1.50002e-07
AHCTF1	2174.71	-0.562066	9.54034e-09	9.64958e-08
SNX2	7437.75	-0.561896	2.16065e-08	2.08829e-07
C9orf91	1077.25	-0.561784	3.74355e-07	3.04307e-06
C12orf4	1162.42	-0.561626	2.59467e-06	1.81031e-05
HSD17B8	183.165	-0.561587	0.00122183	0.00462918
KIAA0101	38568.3	-0.561318	3.64589e-10	4.44677e-09
METTL10	1241.78	-0.560951	1.73714e-08	1.70153e-07
POMP	50393.4	-0.560764	3.2185e-08	3.03819e-07
NUSAP1	6499.44	-0.560658	3.58236e-10	4.38027e-09
HLTF	10797.8	-0.560467	3.37577e-11	4.68589e-10
ANKRD12	1530.95	-0.560367	1.98977e-07	1.6861e-06
RAB30-AS1	2336.37	-0.559453	7.50625e-08	6.7547e-07
NEDD9	3758.04	-0.559361	6.59268e-08	5.97193e-07
MOAP1	969.674	-0.559321	1.50982e-05	9.05951e-05
MRPL3	6374.99	-0.559226	1.7614e-11	2.53931e-10
WIPF1	171.638	-0.558712	0.00231496	0.00808931
CEP350	2180.63	-0.558555	3.48366e-08	3.27464e-07
ATG4C	3936.38	-0.558017	1.84249e-07	1.57229e-06
SWT1	606.041	-0.557642	0.000108159	0.000529179
SNRPA	485.109	-0.557567	5.71746e-05	0.000297933
CDKL3	82.2124	-0.557553	0.0141091	0.0389545
PSMG2	4135.79	-0.557472	1.09268e-10	1.41436e-09
VRK2	1094.77	-0.556853	1.55212e-08	1.52956e-07
MOSPD2	1643.51	-0.556509	0.000252883	0.00114005
PFDN6	2054.21	-0.55649	0.000189857	0.000880144
SGCE	1158.69	-0.556206	2.46067e-06	1.72673e-05
RSRC1	2661.51	-0.556155	7.80141e-06	4.95233e-05
PRKAA2	601.922	-0.55598	5.47193e-06	3.57318e-05
ZGRF1	592.351	-0.555752	8.5672e-06	5.39149e-05
ZNF160	226.195	-0.555562	0.00140065	0.00521311
GTF2H2C	222.938	-0.555414	0.00418107	0.0135934
DDX21	8038.03	-0.554926	6.22626e-07	4.91059e-06
NAE1	4811.72	-0.554825	6.72628e-07	5.26976e-06
BHLHE40	687.345	-0.554653	2.17596e-05	0.000125752
KLHL8	639.496	-0.554533	1.54487e-06	1.12639e-05
UTP11L	8063.1	-0.554507	2.9994e-07	2.47404e-06
THUMPD2	922.059	-0.55446	1.30094e-06	9.65439e-06
CNBP	15705.1	-0.553567	3.13006e-10	3.85961e-09
DIXDC1	111.729	-0.553251	0.00628859	0.0192879
UGGT2	735.124	-0.553052	2.20419e-07	1.85485e-06
GOLT1B	4636.53	-0.552884	7.15978e-09	7.36961e-08
HYKK	144.039	-0.552805	0.00244793	0.00849087
KIAA1731	1250.18	-0.552573	1.93342e-07	1.64233e-06
CDK5RAP2	926.144	-0.552537	3.84035e-07	3.11654e-06
JRKL	1313.05	-0.552386	5.51649e-07	4.3864e-06
CCDC58	7832.25	-0.552345	1.10366e-06	8.31741e-06
DCAF16	614.757	-0.552219	1.19436e-06	8.91795e-06
KIAA1328	103.639	-0.551925	0.0129205	0.0361939
BIN1	77.9127	-0.55176	0.0168123	0.0452353
WDYHV1	991.199	-0.551474	4.68234e-07	3.76421e-06
ZNF473	155.813	-0.551156	0.00337462	0.0112913
RPL37A	132264	-0.550952	0.000167558	0.000787033
GSKIP	1869.06	-0.550579	7.95421e-07	6.1405e-06
STAG2	10174.9	-0.550492	8.91894e-09	9.05878e-08
ETF1	4641.91	-0.549364	1.07233e-10	1.39174e-09
COLGALT1	573.397	-0.549331	0.0017407	0.00631896
GPR89B	423.262	-0.549258	0.000195672	0.000904511
RPL28	31574.6	-0.549233	1.60416e-06	1.16345e-05
ARL6	1256.33	-0.54902	3.20776e-08	3.03001e-07
RRN3P1	206.779	-0.548942	0.000968665	0.00375487
TANK	2999.54	-0.548907	2.14444e-08	2.07538e-07
PTPRF	286.186	-0.548627	0.0124976	0.0351307
CCDC150	142.182	-0.548425	0.00415055	0.0135062
CD97	109.096	-0.547889	0.0119501	0.0337478
EEF1G	13713	-0.547634	1.01675e-05	6.28194e-05
GPX1	740.824	-0.547315	5.16918e-06	3.39373e-05
ZNF136	350.358	-0.547164	4.44861e-05	0.000237417
SPATS2	379.916	-0.546927	0.000388624	0.0016753
MRPL45P2	255.037	-0.546481	0.000704997	0.00283536
MINOS1-NBL1	277.018	-0.54648	0.0103524	0.0297898
ZNF14	233.673	-0.54623	0.000600712	0.002467
IGBP1	4354.83	-0.545927	4.16274e-05	0.000223716
NECAB1	707.602	-0.545586	9.84318e-06	6.09824e-05
TOP2A	14163	-0.545509	7.99067e-08	7.17143e-07
JAG1	8168.92	-0.54512	2.41072e-08	2.30704e-07
SSU72	4281.81	-0.545062	2.46395e-08	2.3518e-07
CCDC104	1875.16	-0.544876	2.69634e-06	1.87317e-05
ZNF280D	2062.14	-0.544871	2.3487e-09	2.59533e-08
EYA4	1133.8	-0.544705	8.01617e-07	6.18506e-06
SMAD2	4938.15	-0.544666	1.08881e-10	1.41061e-09
SMC2	3190.12	-0.544216	1.22547e-07	1.0657e-06
C17orf49	341.334	-0.544073	0.000121536	0.000586939
TSHZ2	85.8501	-0.543789	0.0183598	0.04868
NLE1	102.292	-0.543388	0.0130436	0.0364897
RANBP17	254.967	-0.543229	0.000217261	0.000993279
BLOC1S5	954.03	-0.54316	2.69143e-05	0.000152399
METTL6	579.252	-0.543146	0.000124419	0.000599869
PDZD8	318.377	-0.542953	0.00286173	0.00974755
TOMM7	76354.7	-0.541538	1.14708e-05	7.03943e-05
TXNDC12	6192.92	-0.541257	3.69831e-10	4.50692e-09
PRPS1	927.123	-0.54086	3.49589e-06	2.36549e-05
TNKS2-AS1	168.556	-0.540535	0.00305913	0.0103402
SARNP	6546.32	-0.540402	4.10363e-06	2.74864e-05
UBE2T	8267.25	-0.540264	4.12218e-09	4.39187e-08
RPAP2	2370.44	-0.540153	2.58003e-07	2.14634e-06
MED21	4970.77	-0.539947	5.66247e-10	6.78147e-09
METTL2B	409.282	-0.539663	0.000348391	0.00151985
FKBP3	20501.1	-0.539559	6.36306e-09	6.60082e-08
DERA	4651.86	-0.539548	3.00765e-09	3.2665e-08
USP15	2926.8	-0.539247	5.03904e-09	5.31433e-08
SHPRH	512.431	-0.539173	0.00582895	0.018099
TTLL4	526.458	-0.539116	0.000261948	0.001178
HNRNPU-AS1	575.941	-0.538411	2.03396e-05	0.000118343
TTC32	469.973	-0.538379	4.22347e-05	0.000226729
PUS7L	658.985	-0.538186	1.56274e-05	9.33866e-05
NME7	1969.39	-0.537611	1.22064e-05	7.45323e-05
IFNAR2	509.958	-0.53758	6.53896e-06	4.20217e-05
CRBN	3489.42	-0.537115	1.00182e-07	8.84408e-07
CDKAL1	393.218	-0.536998	0.000198334	0.000913916
MCOLN3	792.168	-0.53646	4.36231e-07	3.51663e-06
C11orf54	4260.75	-0.536274	5.69876e-06	3.71464e-05
DDX10	845.596	-0.535445	0.000169527	0.00079423
GCFC2	2016.79	-0.535108	3.779e-07	3.07018e-06
LRP8	487.32	-0.534804	2.29668e-05	0.000131996
USP45	1538.12	-0.534372	1.65729e-06	1.19757e-05
PRKAR1A	2448.84	-0.533971	3.2188e-07	2.63266e-06
OCIAD1	10283.1	-0.533533	3.18478e-06	2.17967e-05
ZNF85	169.05	-0.533394	0.0025224	0.00873254
TRMT5	1172.53	-0.533288	1.11601e-06	8.40181e-06
ALMS1	199.496	-0.532312	0.00139594	0.00519822
QRSL1	793.97	-0.532188	0.000217162	0.000993138
GNPTAB	2460.3	-0.531926	2.37327e-08	2.27568e-07
CMTM7	276.359	-0.531873	0.000548992	0.00227965
RPS9	11933.7	-0.531873	0.00021155	0.000970216
SAPCD2	150.941	-0.53181	0.00706404	0.0213474
LRRIQ3	734.044	-0.531637	6.98944e-05	0.000356566
IFT46	518.075	-0.531398	0.000893443	0.0035024
TRIM9	546.375	-0.531311	6.08179e-05	0.000314445
MRRF	1178.68	-0.53127	1.35773e-05	8.21459e-05
EIF3D	4850.52	-0.530841	1.92304e-05	0.000112518
MRPS31	3787.76	-0.530837	2.22403e-08	2.14244e-07
AIMP1	7068.24	-0.530423	1.54479e-05	9.24655e-05
KIAA1143	1797.64	-0.530205	5.04419e-06	3.32816e-05
ERCC8	954.318	-0.530182	1.61693e-05	9.62304e-05
DOCK4	449.615	-0.529541	0.000498765	0.00209315
TMEM144	551.163	-0.529506	5.02573e-06	3.31748e-05
TTC21B	943.751	-0.529028	5.78056e-06	3.76459e-05
ZNF480	1658.94	-0.528818	2.51228e-07	2.09626e-06
ARRDC4	2227.11	-0.528641	1.76874e-06	1.27368e-05
SNRPB	3147.39	-0.528088	0.000391057	0.0016843
MRTO4	688.973	-0.527952	0.000474101	0.00199827
HDDC2	13525.9	-0.527855	1.77535e-08	1.73546e-07
PEX11A	583.175	-0.527829	0.000116577	0.000566182
GOLGA4	4586.16	-0.52751	1.27852e-06	9.49765e-06
CLIC1	2018.13	-0.527499	0.000216885	0.000992496
IFT88	1112.25	-0.527061	4.57233e-07	3.67983e-06
DEPDC1	9457.71	-0.527025	6.84776e-09	7.07343e-08
LCMT1	871.875	-0.526861	0.000176339	0.000822182
ERH	11613.7	-0.526827	8.42339e-06	5.31476e-05
CBWD6	304.545	-0.526774	0.0010696	0.00410462
ATP5S	650.191	-0.526666	3.22443e-05	0.000178692
PIK3CA	1007.2	-0.526424	1.07213e-06	8.1007e-06
USP3	1078.83	-0.526204	1.37227e-07	1.1884e-06
MBD4	1005.69	-0.52558	5.83123e-07	4.61652e-06
DEF6	201.839	-0.525285	0.00142993	0.00530583
SH3GLB2	115.079	-0.525014	0.0156091	0.0424956
ZNF891	99.1502	-0.524981	0.0157178	0.042748
AP1S1	331.238	-0.524678	0.00740479	0.0222434
ZNF670	425.389	-0.524049	7.58324e-05	0.000382839
BBX	1508.09	-0.523624	2.69116e-08	2.55696e-07
JADE1	709.329	-0.523351	2.09399e-06	1.4895e-05
TOMM34	282.069	-0.523227	0.00122583	0.00463824
TRIM36	113.47	-0.522816	0.00843712	0.0248929
USP25	1427.91	-0.522651	9.56843e-06	5.93952e-05
WDR17	679.763	-0.52247	0.000124909	0.000602035
MYL12A	10690.9	-0.522414	3.05676e-07	2.51386e-06
TFDP2	1778.4	-0.521675	3.32103e-07	2.71171e-06
ZNF669	87.8996	-0.520642	0.0182219	0.0483759
TTC17	530.778	-0.520492	6.69666e-05	0.000343554
DHPS	260.789	-0.520453	0.000909827	0.00355706
DTD1	745.89	-0.520281	0.00136252	0.00509236
WDR46	335.389	-0.520044	0.000757513	0.00302321
SMC5	1037.98	-0.520004	8.61247e-06	5.41764e-05
DDX31	284.309	-0.519505	0.000435049	0.00185275
TXLNB	103.8	-0.519328	0.0153008	0.0418013
METTL14	558.571	-0.519212	0.00106286	0.00408201
LHFPL2	816.976	-0.519187	1.50851e-05	9.05543e-05
DAP3	3875.5	-0.51908	3.79261e-05	0.000206105
MFN1	4173.07	-0.518975	4.32042e-08	4.01339e-07
LRBA	678.012	-0.518844	2.67669e-05	0.000151742
TYW3	3681.28	-0.518788	5.38766e-07	4.28865e-06
ADCY1	445.767	-0.518416	0.000352588	0.00153677
KARS	2076.03	-0.518082	9.57856e-07	7.30165e-06
DLEU2	519.177	-0.517918	1.94824e-05	0.000113719
SNHG15	551.678	-0.517636	0.000407991	0.00175051
SMARCD1	324.794	-0.517626	0.00269323	0.0092427
DHFR	7426.47	-0.517614	2.12736e-08	2.06159e-07
NPRL2	255.754	-0.517153	0.00105148	0.00404253
ZNF431	334.972	-0.516622	0.000273842	0.00122716
DNAJC8	7646.95	-0.516079	0.000172952	0.000808459
TBCE	920.668	-0.515801	0.000361175	0.00156997
PPIL1	3466.69	-0.51566	2.1944e-08	2.11671e-07
BBIP1	5687.77	-0.515582	1.43378e-06	1.05171e-05
ALKBH3	420.053	-0.515539	0.000800116	0.00317512
LSM5	24230.8	-0.51542	0.000643366	0.00262002
TAF1A	406.312	-0.515313	0.000425487	0.00181808
ARL15	272.699	-0.514959	0.00102786	0.00396276
PPARGC1B	140.802	-0.514802	0.00608664	0.0187831
ADD3	19952.4	-0.514785	1.31196e-08	1.30882e-07
NUDT4P1	2217.39	-0.51471	9.05846e-08	8.05534e-07
NIN	6665.5	-0.514647	1.84939e-08	1.80421e-07
CCNB1	9902.23	-0.514413	6.55684e-07	5.14072e-06
FAM228B	208.618	-0.514402	0.00204611	0.00727013
ZNF37A	291.022	-0.514165	0.000859742	0.00338577
BORA	931.52	-0.514093	9.19717e-05	0.000457348
PPP1R3E	154.414	-0.513884	0.00340297	0.0113654
TRAP1	486.368	-0.513838	2.42842e-05	0.000138801
SKIV2L2	4113.12	-0.513754	2.09713e-07	1.77089e-06
MRPS10	3570.71	-0.513476	1.97175e-06	1.40736e-05
UBA52	74126.2	-0.513082	4.25664e-08	3.95919e-07
RPL10	36558.1	-0.512879	1.16501e-05	7.14189e-05
MPHOSPH10	2340.01	-0.512422	0.000436123	0.00185645
RAD50	412.903	-0.512366	0.000256823	0.00115602
LOC101926888	513.657	-0.512314	0.000224799	0.00102389
TSPAN13	1304.89	-0.512271	2.2172e-06	1.57178e-05
CASP3	2011.35	-0.51227	1.40156e-06	1.03118e-05
ZNF43	787.919	-0.512262	2.97659e-06	2.05222e-05
SEPT10	4729.65	-0.512059	1.11728e-06	8.40702e-06
CSNK2A1	2012.05	-0.511976	4.29773e-08	3.99486e-07
LACTB2	6763.92	-0.511558	2.9588e-09	3.21584e-08
LINC00958	480.771	-0.511535	0.000400452	0.00172171
THNSL1	661.731	-0.511223	4.96938e-05	0.000262233
COA1	3810.42	-0.510965	1.84575e-06	1.32326e-05
PACS1	297.885	-0.510477	0.0185367	0.0490776
CHURC1	10924.9	-0.510456	0.000564223	0.0023316
LRRC8D	6289.47	-0.509976	3.77909e-09	4.05002e-08
STAT1	6421.71	-0.50936	4.95276e-07	3.96629e-06
ERAP2	98.6768	-0.508942	0.0167712	0.0451413
STX8	2413.73	-0.508098	2.30399e-06	1.62697e-05
DDX50	1541.36	-0.508061	5.28413e-06	3.45985e-05
OBFC1	299.047	-0.507807	0.000381255	0.00164646
NUP54	5123.96	-0.507761	1.53499e-08	1.5137e-07
MSH3	567.184	-0.507754	3.60804e-05	0.000197177
AVL9	318.835	-0.507483	0.00066433	0.00269336
GLRX2	1457.03	-0.506998	1.84401e-05	0.000108329
QSOX1	140.04	-0.506842	0.0178144	0.0475019
EIF3J-AS1	204.253	-0.506732	0.00190521	0.00683096
MTRF1	836.227	-0.504852	2.24865e-05	0.000129644
FKBP11	846.235	-0.504742	3.91847e-06	2.63552e-05
UBE2V2	9925.76	-0.504493	4.54237e-06	3.02306e-05
CCDC132	2422.14	-0.503631	6.06632e-07	4.79222e-06
FNIP2	1334.99	-0.502509	0.00192828	0.00690702
PPP2R3C	5161.46	-0.502138	2.18741e-08	2.11136e-07
C14orf166	10333.7	-0.50201	5.17217e-08	4.75012e-07
AP1S2	24253.9	-0.501594	9.64856e-08	8.5488e-07
PLEKHH2	986.252	-0.501456	3.29667e-06	2.24843e-05
SCAPER	756.094	-0.501376	1.70069e-05	0.00010071
KIF17	143.651	-0.501096	0.00715873	0.0215843
RABEPK	217.42	-0.500785	0.0011534	0.00439612
MBTPS2	4533.99	-0.500732	2.03009e-07	1.71926e-06
ANAPC16	3384.01	-0.500617	2.49897e-06	1.7494e-05
RNF182	251.768	-0.500528	0.00174182	0.00631989
MTO1	1145.63	-0.500053	2.63441e-06	1.83628e-05
TLE3	97.3292	-0.499821	0.0173498	0.0464499
ADK	2224.37	-0.499816	3.89595e-07	3.1599e-06
ZNF33B	528.823	-0.499748	6.782e-05	0.0003472
TANGO6	194.83	-0.499326	0.00206341	0.00732447
EXO1	929.364	-0.49867	3.04728e-05	0.000170039
SENP8	174.845	-0.498319	0.00464385	0.0148626
NHP2L1	8734.74	-0.498036	6.37227e-06	4.10048e-05
FAM134B	344.569	-0.497896	0.00113107	0.00431552
MSRB2	636.027	-0.497875	0.000385476	0.00166419
ENAH	2460.34	-0.497603	4.39675e-06	2.93688e-05
ALG5	4845.45	-0.497384	1.192e-06	8.90944e-06
ZNF680	2641.56	-0.497182	1.02088e-06	7.74561e-06
NNT-AS1	1269.97	-0.496324	0.000122165	0.000589589
ZC3H15	7179.32	-0.495898	0.000167263	0.000785901
UBXN2B	1796.65	-0.495861	2.05333e-07	1.73693e-06
SDCCAG8	939.607	-0.495589	2.45436e-05	0.000140173
C4orf27	2556.26	-0.495572	6.29413e-06	4.05378e-05
MPHOSPH9	784.148	-0.495239	2.51799e-05	0.000143414
NBAS	265.308	-0.494932	0.00420286	0.013652
CCBL2	3834.8	-0.494729	2.65636e-07	2.20732e-06
RPGRIP1L	607.502	-0.494331	0.000950119	0.00369289
CCDC14	6027.22	-0.494278	1.87832e-08	1.82998e-07
EXOSC9	4708.67	-0.493512	8.58396e-05	0.000429345
PTBP3	3550.7	-0.493359	5.6839e-07	4.50968e-06
FAM35A	2531.3	-0.492953	3.66136e-07	2.97959e-06
MTBP	966.925	-0.492811	1.70224e-06	1.22883e-05
CEP83	487.444	-0.49237	0.00103464	0.00398622
THADA	619.446	-0.491743	4.44657e-05	0.000237417
DPYSL3	178.021	-0.49144	0.00505208	0.0159588
ECI2	4892.04	-0.491374	5.59866e-05	0.00029258
SNURF	887.935	-0.491373	0.000153033	0.000724882
LYPLAL1	4599.36	-0.491338	3.44237e-09	3.70825e-08
LRPPRC	10925.7	-0.491059	1.13414e-08	1.13922e-07
GEMIN2	2240.94	-0.490609	3.26051e-06	2.22689e-05
RPF1	6385.86	-0.489954	3.56068e-08	3.33957e-07
NCAM2	1071.79	-0.48982	6.87428e-06	4.40407e-05
EMC2	12373.4	-0.489489	7.37318e-05	0.00037301
STAU2	1745.87	-0.489027	1.1836e-06	8.85576e-06
ADA	155.257	-0.488489	0.00702337	0.0212377
PLA2G16	1173.5	-0.488318	0.000179129	0.000834389
SNAP23	5682.84	-0.487855	6.35104e-07	4.99544e-06
ZNRD1	902.158	-0.487818	6.9176e-05	0.000353149
WDFY2	246.891	-0.487705	0.00230783	0.00806633
MYL12B	15286.1	-0.487598	9.75202e-07	7.42611e-06
TTC9C	709.673	-0.487091	4.15299e-05	0.000223357
ESCO2	2265.05	-0.487085	4.35009e-08	4.03838e-07
TSR1	761.374	-0.48701	0.000399498	0.00171811
TNFRSF21	1332.86	-0.486839	1.74481e-05	0.000103083
C1GALT1C1	2847.37	-0.486495	9.59592e-06	5.95405e-05
DLGAP1	885.965	-0.48647	5.18228e-06	3.39927e-05
[truncated: 3,528 more rows]

## Sheet: Table S2
Table S2. The 250 pigmentation genes with differential expression under AZD6244 treatment. Genes associated with H3K27ac loss or gain regions by GREAT analysis, or with SOX10 binding sites under AZD6244 are also indicated.
Gene Symbol	Log2 Fold Change	H3K27ac loss under AZD6244	H3K27ac gain under AZD6244	SOX10 binding under AZD6244; *=novel SOX10 binding site
CTLA4	-3.74435	X		X
SLC7A11	-2.26808	X		X*
FREM2	-1.89853	X
CARS	-1.87264	X		X*
BRCA2	-1.57768	X		X*
ATP6V1E2	-1.53061	X		X*
ALCAM	-1.50697	X		X
CBS	-1.46711	X
ATOX1	-1.42939	X
RAB3IP	-1.34877
EIF3E	-1.34843	X
OPHN1	-1.31246	X		X*
CEP290	-1.22322	X
GPC3	-1.16448	X		X*
RPS6	-1.14678	X
HES1	-1.13713	X		X*
EIF3H	-1.12095	X
ATM	-1.05987	X
RPS19	-1.04384	X
NOC3L	-1.01452	X
C8orf37	-1.01091	X
SEMA4C	-0.956339	X		X*
POC1B	-0.928393	X
RPL24	-0.922198	X
FANCD2	-0.919063	X
CDK7	-0.912622
PAICS	-0.900115	X
TTC8	-0.8905	X
BLM	-0.849691	X		X*
RPL27A	-0.841915	X	X	X
ECE1	-0.829765	X
RPS7	-0.818261	X
FANCI	-0.816346	X
CDKN2A	-0.809404	X
LARP7	-0.807761	X
RPS14	-0.785739	X
SOX5	-0.753787	X		X*
GART	-0.75332	X
RPS20	-0.749987	X
GNB2L1	-0.741467	X
FHL1	-0.730105
MYC	-0.711452	X
INPP5B	-0.689384	X
RAB17	-0.684571	X
SLC31A1	-0.678042	X		X*
GMPS	-0.663797	X
NUP88	-0.63213	X
RPGR	-0.606137
FSCN1	-0.592692	X		X*
POLA1	-0.588321	X
CHEK1	-0.579494	X
WRN	-0.569516	X	X
GPR89B	-0.549258
ARL6	-0.54902	X
BLOC1S5	-0.54316	X	X
PRPS1	-0.54086	X
MCOLN3	-0.53646
USP45	-0.534372	X	X
PRKAR1A	-0.533971	X
USP3	-0.526204	X
AP1S1	-0.524678	X
SMARCD1	-0.517626	X
BBIP1	-0.515582	X
SKIV2L2	-0.513754	X
RAD50	-0.512366
ESCO2	-0.487085	X	X
GPR89A	-0.475382
USP53	-0.466128	X
STX17	-0.457501	X		X*
NSMCE2	-0.457008	X		X*
EIF3G	-0.433843
UXT	-0.425664	X
EIF3I	-0.420579	X
EED	-0.410118	X
MYO6	-0.405063	X
RNF41	-0.3975	X
ADAM17	-0.395209	X
CCT2	-0.39387	X
MIB1	-0.387094
PLK4	-0.383871	X
TERF1	-0.376982			X*
FIG4	-0.371596	X		X*
MKLN1	-0.36733	X	X	X*
BBS4	-0.357982	X
USP28	-0.356184
NAA10	-0.35486
MLANA	-0.346814	X		X*
TRIM33	-0.339022	X		X
YWHAE	-0.337576	X
SAMD9	-0.336479	X
RNF2	-0.335031	X
SCARB2	-0.333392	X		X*
MCM2	-0.330317	X
SMCHD1	-0.330077	X
POGLUT1	-0.320358
PALB2	-0.319435	X
UCHL3	-0.316009	X
CSNK1A1	-0.304576	X
EBNA1BP2	-0.302215	X	X	X*
USP48	-0.301486	X		X*
EIF3C	-0.299421
AHCY	-0.298204	X
FBXO5	-0.286797	X		X*
BRCA1	-0.283338	X		X*
SNRPC	-0.279564	X		X*
KITLG	-0.276439	X		X*
LYST	-0.257619	X		X*
ITGB1	-0.239472	X		X*
NBN	-0.236514
DOCK7	0.244648	X
NR3C1	0.249319	X		X*
RAPH1	0.25339	X
MKKS	0.254285
OAT	0.255731	X
CAV1	0.27714	X
SFPQ	0.281037
RAB7A	0.281948	X		X
EDNRB	0.283948	X	X	X*
MAP2K1	0.284946	X
MCM4	0.290341	X
ATP6V0C	0.31238	X
NOTCH2	0.313773	X
PTPN11	0.31891		X
DDX3X	0.355404	X
NR4A3	0.363857	X	X
DLAT	0.379133
PTS	0.379751
RIC8B	0.380925	X		X*
CDH3	0.38268	X
AFG3L2	0.388187	X
GPNMB	0.391143	X
CTR9	0.396001
SPAG9	0.397719	X		X*
KCTD15	0.40013	X
ATP7A	0.401667	X
IFT27	0.404394
PTEN	0.404991	X		X
IGSF11	0.406665	X	X	X*
KIF13A	0.406825	X		X*
MYCBP2	0.418888			X*
TERF2IP	0.419947	X
COPB2	0.421073	X
SMARCAL1	0.422124		X
MITF	0.426948	X		X*
ATP6V0D1	0.427674	X
DSTYK	0.430783	X
RAB1A	0.431201	X
DCTN1	0.442494	X
PNN	0.444983	X
COPA	0.446174	X
TSC1	0.446407	X
ADRBK2	0.446958	X	X	X*
SHROOM2	0.447732	X		X*
VPS11	0.44841
VPS39	0.448498
SLC45A2	0.450428	X		X*
TAF4	0.453294	X		X
HPS5	0.453603	X		X*
KIT	0.460693	X	X	X*
VANGL1	0.46152	X
MYO5A	0.46848	X		X*
ALDOA	0.469991	X
ATP6V0B	0.47615	X
MYO10	0.483784	X		X*
TBC1D10B	0.485552
BCL2L11	0.493801	X
TACO1	0.494305
SLC2A1	0.516033	X	X	X*
MYH9	0.516211	X
SOX10	0.517108	X
TRPM1	0.523731	X		X*
SDC2	0.52646		X
HIPK2	0.53203	X		X
MEN1	0.533214
DMXL2	0.538617	X
PAX3	0.550574	X	X
CIB2	0.558606
PEPD	0.571074
GPATCH3	0.571766
GPR124	0.580908
ANXA2	0.583151	X		X
UQCRFS1	0.595933
RAPGEF2	0.601949	X		X*
USB1	0.604647
ATP6AP1	0.607978
GPR143	0.618798	X
ENPP1	0.633664	X
OPTN	0.636826
TPCN2	0.640663	X		X*
SUPT5H	0.644322	X
PARP3	0.64523
HPS6	0.651283	X
CTSD	0.661081
SUFU	0.66506
PMEL	0.675469	X		X
GPR161	0.684666	X		X*
SNAI2	0.690671	X	X	X*
PTPN21	0.692352
TET2	0.698077	X
SUPT6H	0.699694	X
SDC4	0.711705
APC	0.712521	X	X
HRAS	0.720053
DHRSX	0.725835	X
GNAS	0.72714	X
PSEN2	0.73027	X		X*
SDF4	0.732774
BMPR2	0.733397	X
TGFBR2	0.742711	X	X	X*
ABCB6	0.74631	X
SASH1	0.754165
RAB11B	0.783283
SIK2	0.78587	X
CTNS	0.795967
INPP5E	0.797039	X
SH3PXD2A	0.801234	X	X	X*
ETS1	0.820255	X		X*
AP3D1	0.830483
ALDH2	0.832449
LMLN	0.841849	X
VPS18	0.860049
GNA11	0.861797
BBS1	0.865515
DCT	0.904194	X	X	X*
NSF	0.912706
PPARGC1A	0.91511	X	X	X*
TRIM32	0.919627	X
ZEB2	0.982584	X	X	X*
SH3BP4	0.984119	X		X*
LMNA	1.00235	X
RILP	1.00753
MAFB	1.02441	X
THRA	1.05034	X
RAB32	1.05368	X	X	X
CITED1	1.06971	X		X*
SLC30A4	1.07733		X	X*
CXCL12	1.10319		X
LHX2	1.13203
NNT	1.18543	X
STXBP1	1.23263	X		X
TYRP1	1.24987	X	X	X
COL17A1	1.28388	X
HEXIM1	1.28607	X
MEF2C	1.45323	X	X	X*
MLPH	1.4562	X
TFAP2A	1.4677	X	X	X*
DIO2	2.33745		X	X*
IRF4	2.45171	X		X*
OCA2	2.6705	X	X	X
KCNJ13	3.15108

## Sheet: Table S3
Table S3. Top 5 significantly enriched transcription factor motifs identified by de novo motif enrichment analysis of genomic regions that were losing or gaining H3K27ac in 501mel cells in response to AZD6244 treatment.
Top 5 de novo motifs significantly enriched in loss H3K27ac ChIP-seq regions in response to AZD6244 treatment in 501mel cells.
Rank	Motif	P-value	log P-pvalue	% of Targets	% of Background	Best Match To Known Motifs
1	ACMGGAAGTD	1e-216	-499.1	0.5048	0.3313	Etv2(ETS)/ES-ER71-ChIP-Seq(GSE59402)/Homer(0.967)(0.970)
2	DATGASTCAY	1e-123	-284.2	0.1072	0.0428	Atf3(bZIP)/GBM-ATF3-ChIP-Seq(GSE33912)/Homer(0.986)
3	WAACCGGA	1e-97	-224.2	0.6755	0.5588	TFCP2/MA0145.3/Jaspar(0.755)
4	GTCATGTGAC	1e-84	-194.7	0.1724	0.0999	MITF(bHLH)/MastCells-MITF-ChIP-Seq(GSE48085)/Homer(0.929)
5	WWWWHCSG	1e-82	-189.4	0.503	0.3947	PB0184.1_Tbp_2/Jaspar(0.595)
Top 5 de novo motifs significantly enriched in gain H3K27ac ChIP-seq regions in response to AZD6244 treatment in 501mel cells.
Rank	Motif	P-value	log P-pvalue	% of Targets	% of Background	Best Match To Known Motifs
1	GTCATGTGAC	1e-285	-656.8	0.3097	0.1483	MITF(bHLH)/MastCells-MITF-ChIP-Seq(GSE48085)/Homer(0.942)
2	NNBCTTTGTD	1e-145	-333.9	0.4587	0.3196	SOX10/MA0442.1/Jaspar(0.920)
3	TGACCTTBWN	1e-90	-207.4	0.2289	0.1435	Esrrb(NR)/mES-Esrrb-ChIP-Seq(GSE11431)/Homer(0.938)
4	AATGGATCCTTT	1e-83	-191.4	0.5781	0.469	PB0135.1_Hoxa3_2/Jaspar(0.587)
5	AMAAWGCWTT	1e-67	-154.4	0.5669	0.4691	Sox9(HMG)/Limb-SOX9-ChIP-Seq(GSE73225)/Homer(0.606)

## Sheet: Table S4
Table S4. The 799 super-enhancers identified in 501mel cells treated with DMSO only, and the 583 super-enhancers identified in 501mel cells treated with AZD6244.
799 super-enhancers under control (DMSO-treated) conditions									583 super-enhancers under AZD6244 treatment
Chromosome	Super-enhancer start	Super-enhancer end	Number of constituents stitched	Size of stitched constituents	H3K27ac ChIP signal	Input signal	Enhancer rank		Chromosome	Super-enhancer start	Super-enhancer end	Number of constituents stitched	Size of stitched constituents	H3K27ac ChIP signal	Input signal	Enhancer rank
chr3	98447893	98535362	10	72160	211771	23502.9	1		chr1	66710326	66818966	22	42807	111302	23900.8	1
chr1	66709199	66826966	21	81317	177864	24260	2		chr3	98454903	98520436	16	30025	82145.6	17418.7	2
chr2	37520264	37645199	18	96190	170349	20177	3		chr2	12443179	12539870	20	33153	78919.2	17075.6	3
chr2	12443092	12596988	21	79303	160529	25408.2	4		chr5	9425225	9468440	9	26569	68642.7	12973.1	4
chr5	9312575	9399495	17	62517	159333	26189	5		chr6	64226321	64291057	22	26774	67105.3	12817.7	5
chr6	142617061	142731892	21	85957	143803	13917.5	6		chr5	9337354	9394050	18	25420	68987.7	16776.3	6
chr5	9421302	9519930	19	55107	154126	28592.3	7		chr5	14146306	14205709	21	23505	68283.7	16626.9	7
chr6	138088893	138199221	19	71616	138208	21039.5	8		chr3	152953034	153009052	10	23235	61715	11987.9	8
chr5	14143940	14251134	24	63468	151036	36446	9		chr4	23888822	23956488	18	32979	59600.2	10055.2	9
chr3	152936375	153014599	11	48986	129914	17663	10		chr5	9192249	9246146	13	21430	59744.8	13749.1	10
chr5	39394369	39488038	17	50581	128092	20719.6	11		chr5	39423793	39466920	9	21632	58139.5	12498.2	11
chr3	185394977	185493457	24	51344	141713	35265.7	12		chr1	87599346	87638399	9	16623	58997.4	14109.8	12
chr12	20663138	20761960	17	75372	110977	8261.52	13		chr10	127896459	127954664	17	27479	55184.2	10325.6	13
chr3	69935536	70051538	21	62235	118995	18560.3	14		chr7	22858627	22917802	14	21687	57340.6	13332.1	14
chr15	99316473	99424491	27	55174	123853	25611.1	15		chr1	117007221	117042199	13	17773	56989.7	13505	15
chr6	64217520	64291247	18	53360	113414	16308.4	16		chr3	185404481	185456594	12	17140	56250.8	14539.5	16
chr3	76357419	76434867	15	65013	105995	10292.8	17		chr15	58716766	58765773	12	18953	52672.7	11717.6	17
chr3	149244760	149359934	25	47132	129928	34563.7	18		chr6	142617549	142677251	20	25158	49379.5	8728.43	18
chr6	134756780	134906602	28	63704	116397	22113.7	19		chr2	145779512	145802120	6	17839	47849.8	7571.42	19
chr11	87829415	87915104	17	56450	103846	11945	20		chr1	117207352	117254577	7	13813	54322.9	15187.6	20
chr3	183221651	183281948	11	38238	111381	24335.9	21		chr12	20698082	20754746	23	32493	43965.6	5037.43	21
chr7	22847365	22917849	16	43745	103372	19650.9	22		chr5	8813574	8846604	7	17134	47450.9	9235.19	22
chr6	15384842	15506622	30	48367	111063	27631.9	23		chr7	116313165	116357969	12	23538	46112.3	8409.71	23
chr3	185785509	185830560	10	37506	103478	20250.4	24		chr10	63733581	63810850	11	19314	49792.1	12486.7	24
chr3	171474651	171552998	16	42927	99579	18693.6	25		chr1	110527295	110572869	11	15153	52077.4	14971.1	25
chr5	9187815	9269303	15	38551	100442	21659.5	26		chr9	12666483	12710844	18	33395	41118.2	4294.14	26
chr1	76539440	76620614	24	47807	97441.3	19741.5	27		chr17	70572798	70629106	19	19917	46392.2	9752.55	27
chr8	81926461	82044171	18	49320	96251.5	18586.4	28		chr3	185787625	185817008	6	16922	44929.5	9352.61	28
chr1	120171797	120218934	6	31221	92765.6	15244.1	29		chr6	17454097	17495814	16	19363	43510.8	8126.47	29
chr6	126053731	126171724	24	51445	94547.8	17191.6	30		chr8	130524286	130571835	11	22917	41843.1	6785.24	30
chr13	78459848	78574300	20	54802	88288.3	11388	31		chr5	159865674	159909297	13	22106	42920.7	7921.94	31
chr6	9200178	9259318	4	39247	84321.8	8184.98	32		chr2	145681627	145709978	4	14382	44295.6	9409.7	32
chr7	104398429	104456075	13	43484	85195	12174.8	33		chr11	87879322	87909650	12	27230	40415.1	5571.25	33
chr1	117007106	117042508	5	24974	92519.6	19715.4	34		chr1	95870337	95916640	6	9874	48553.3	13742.7	34
chr2	145676964	145712912	6	28884	81724.2	9227.85	35		chr5	16970657	17025533	13	13234	47808	13483	35
chr7	116311081	116380659	13	45521	81844.6	10116.6	36		chr1	76548121	76593084	12	17421	42265.2	8313.66	36
chr5	8813458	8847719	4	24948	81667.9	11957.1	37		chr1	92027581	92061572	11	15064	42386.8	9129.98	37
chr7	95099563	95179560	20	47433	81716.9	12255.5	38		chr2	37592909	37644435	14	19076	40556.1	7584.63	38
chr1	116954497	116985442	7	20911	82072.3	13529.2	39		chr22	38411590	38447264	10	13671	42341.5	10152.8	39
chr8	59496115	59573533	21	45536	79980.5	11976.6	40		chr3	89203176	89233975	12	19993	34929.1	4807.72	40
chr4	23879738	23972902	13	44997	79161.5	12884.6	41		chr10	22905378	22957772	13	20504	34622	4678.78	41
chr2	159906591	159981955	15	36328	85327.1	19285.6	42		chr6	13299024	13328803	6	15201	37512.6	7793.16	42
chr8	130522673	130584188	7	40107	75011.4	9067.31	43		chr3	76358116	76396978	12	20931	35255.6	5650.53	43
chr12	19335253	19405152	13	49555	71737.3	6248.97	44		chr5	34864859	34898173	6	11649	37884.7	8308.51	44
chr1	145091462	145118314	6	21386	77315	13375	45		chr1	104900293	104950146	7	11987	39937.2	10414.3	45
chr5	159865713	159910418	5	36782	73226.8	9437.23	46		chr6	138098237	138148544	17	19158	36668.8	7344.82	46
chr12	75999648	76066953	11	38780	75038.3	11293.8	47		chr3	101653747	101675798	8	17488	36026.9	6752.02	47
chr6	11197142	11238181	13	35129	76369.5	12832.9	48		chr11	78008450	78063986	13	13378	38136.6	9002.39	48
chr2	145778937	145802159	3	20794	70063.1	6692.58	49		chr6	9080008	9099491	5	18718	33534.1	4403.16	49
chr2	37846035	37900452	12	38467	74954	12358.1	50		chr15	99382784	99420687	9	15571	37573.2	8672.21	50
chr15	58699937	58767999	15	32075	80735.1	18717	51		chr3	69968207	69996242	11	19901	34718.5	5834.08	51
chr3	101653743	101678125	3	23128	68445.2	6970.81	52		chr1	33803002	33832720	10	15977	35741.8	7482.99	52
chr11	77999774	78066493	17	39206	72310.1	11609.1	53		chr10	111335080	111378503	11	13117	35003.3	7195.19	53
chr1	95435558	95509146	10	25485	85192.8	25100.9	54		chr1	210022924	210064841	14	18036	32900.7	5642.03	54
chr6	9077652	9102093	3	23453	64480.2	4458.04	55		chr6	11201092	11237200	8	13628	35555.5	8391.5	55
chr11	88890649	88937040	9	37092	65768.5	5919.49	56		chr1	118620237	118654734	6	11231	35456	8455.21	56
chr7	95205623	95266180	9	38819	68199.3	8605.15	57		chr1	145092296	145115311	6	7767	38651.4	11786	57
chr8	12626737	12679893	9	30229	67152	8175.39	58		chr11	88893040	88923811	16	19413	31032.6	4372.56	58
chr9	12666154	12711109	5	42908	62370.6	3519.98	59		chr4	120032399	120073066	10	15831	32472.6	6059.38	59
chr6	13297935	13332574	6	27499	68037.9	9504.94	60		chr2	159907203	159956520	11	13307	35902.8	9621.75	60
chr8	127836233	127888975	9	34542	68163.8	9841.66	61		chr5	17906534	17921602	2	14656	29394.7	3355.64	61
chr3	118643537	118720279	13	39407	70556.6	12555	62		chr3	171489854	171510141	9	15731	30996.5	5118.41	62
chr10	127896361	127955460	12	32960	71066.5	13651.9	63		chr2	145266686	145282624	5	12971	32612.3	6878.84	63
chr7	46787112	46855426	13	29900	69700.8	12522	64		chr1	116972882	116985575	5	11828	29667.3	4017.33	64
chr1	87599787	87640062	10	22456	71907	15461.6	65		chr7	80376366	80410912	6	14959	31146.7	5541.18	65
chr10	63718792	63811894	12	30815	70813.4	14700.8	66		chr14	67977104	68012915	6	15832	31771.5	6277.67	66
chr5	59780092	59847715	10	37092	64066	8101.24	67		chr6	138889059	138927125	11	15995	31214.1	5728.93	67
chr7	130565963	130647084	15	34928	69812.7	14423.3	68		chr3	89265945	89303302	12	16453	30262.9	4886.3	68
chr10	22894839	22963397	14	43415	63457.3	8350.36	69		chr1	9494527	9516053	8	13096	31234.2	6022.97	69
chr11	128361101	128424432	15	35098	66592.5	12083.6	70		chr12	85669196	85705666	7	14954	29770.5	4715.57	70
chr17	55369169	55448611	10	25333	73483.9	19018.4	71		chr15	69275523	69299382	8	14488	30525.2	5487.57	71
chr4	120021706	120073402	10	35699	61420	6958.28	72		chr5	9140648	9169435	10	11071	32209.8	7343.56	72
chr22	20861204	20918717	11	23719	75014.2	20917.5	73		chr6	15316324	15370511	11	9304	34295	9564.01	73
chr5	59021045	59110559	18	49731	60815.8	6767.26	74		chr20	20054167	20070637	4	14088	28980.6	4338.2	74
chr16	21600593	21651301	10	32002	64460	11769.3	75		chr8	127836287	127866298	11	16096	29260.7	4735.74	75
chr10	111792028	111865931	13	28580	62832.3	10228.2	76		chr6	9126757	9163083	11	14817	29449.5	5107.44	76
chr10	83620621	83685110	11	29662	63366.9	11098.6	77		chr12	19357991	19394624	11	18279	28266	4022.3	77
chr3	89194088	89235124	5	31694	57282.2	5383.92	78		chr6	142697668	142727652	9	16400	29180.4	5010.33	78
chr2	206547071	206589009	8	29017	64253.2	12623.3	79		chr3	155139624	155169826	7	11913	31114.1	7015.92	79
chr16	48295625	48361568	10	31872	58873.9	7741.71	80		chr18	74810207	74844026	12	15087	28451.9	4457.34	80
chr5	17897124	17922132	3	17918	55312.7	4508.94	81		chr13	51879860	51910095	11	14004	29397.5	5406.02	81
chr6	138881661	138935791	12	30164	62666.3	12200.9	82		chr5	7396586	7423482	6	10685	30962.7	7315.71	82
chr3	89263615	89328173	16	36531	57456.6	7488.73	83		chr17	55403502	55447936	9	12513	31628.1	8104.76	83
chr10	82217593	82270070	14	32740	64546.7	14856.2	84		chr4	10555589	10592437	10	13343	28487.2	5228.73	84
chr4	15001706	15058656	11	38310	55651.5	6161.99	85		chr3	37494780	37535227	9	14273	28393.8	5618.09	85
chr1	185262770	185320391	14	29240	58156.9	9455.61	86		chr22	20863244	20887431	9	10860	28743.8	6037.08	86
chr1	185441910	185470207	4	24379	55931.9	7430.79	87		chr2	144358885	144375360	7	11720	28004.2	5484.53	87
chr6	150938974	151018658	16	31486	60440.3	12765.4	88		chr18	67900203	67928044	5	14731	25725.1	3215.64	88
chr12	20575787	20648760	24	44154	54598.4	7005.41	89		chr11	128389051	128424039	9	10116	29029.5	6700.2	89
chr1	9488529	9515919	6	20759	60693.5	13500.5	90		chr1	120173685	120198118	8	9966	30125.9	8114.2	90
chr1	183039159	183082338	11	32370	55044.6	7996.75	91		chr6	7124244	7153808	12	9790	28127.2	6468.6	91
chr17	66372697	66411445	8	26591	55870.7	9121.28	92		chr3	183222974	183238881	7	11879	26547.2	4907.31	92
chr17	59282535	59345806	12	27021	57734.8	11477.4	93		chr7	104431328	104449598	7	15234	25589	4021.23	93
chr7	95285280	95324053	10	26922	51785.2	5703.51	94		chr2	206549227	206570012	6	10894	27506.9	6277.07	94
chr5	16970725	17025722	12	20527	64000	18011.5	95		chr6	134832571	134871865	10	9570	27207.2	6110.22	95
chr6	17448031	17498148	8	24321	57063.2	11436.7	96		chr3	105832133	105859078	6	12029	26856.1	5777.01	96
chr1	33799676	33833505	8	24314	57059.4	11488.3	97		chr1	183050424	183080641	6	10128	26974.7	5913.47	97
chr6	30717243	30769229	13	27659	58380.3	12918.5	98		chr3	183251600	183272435	8	8591	27377.2	6467.18	98
chr2	145263583	145282941	4	16623	53263.5	8467.19	99		chr2	223102642	223138124	10	10220	27629.8	6734.48	99
chr4	108035719	108082845	11	33394	49807.5	5089.61	100		chr8	122357258	122379288	7	14034	24501.8	3641.56	100
chr1	95870304	95917571	7	13944	58275.5	13721.6	101		chr2	38405009	38445682	8	10511	27856.9	7060.83	101
chr17	63737971	63781897	10	24795	51582.3	7243.4	102		chr8	122625185	122649774	13	14484	25277.5	4524.38	102
chr7	14018478	14063069	6	25707	51288.6	7143.48	103		chr11	110201893	110248224	11	9817	27131.4	6528.04	103
chr5	14413938	14451475	7	20067	55322	11857.9	104		chr12	63095757	63127085	12	9616	26537.9	6052.57	104
chr22	38551541	38577822	5	14084	56259.7	13340.2	105		chr1	15497674	15515470	7	11115	25937.7	5490.07	105
chr8	17597091	17666531	15	25257	55378.4	12610.3	106		chr1	43520641	43539581	8	9686	25597.4	5191.45	106
chr22	38411613	38436502	4	16486	56570.2	13830.8	107		chr15	48387660	48416136	8	13990	24794.1	4487.82	107
chr3	146599779	146633546	7	22083	48378	5774.16	108		chr5	59020983	59063579	16	14318	23044.4	2836.89	108
chr3	150053026	150103788	10	21781	55553.9	12969.7	109		chr15	98653708	98677983	9	8725	25117.3	5136.59	109
chr2	97606919	97645582	13	24343	55813.9	13563	110		chr2	37533242	37555224	9	16774	23314.1	3356.65	110
chr1	63564462	63615310	11	24697	51107.3	9234	111		chr3	146607610	146632522	6	9099	25280.7	5323.69	111
chr15	33404720	33453178	8	27216	50154	8296.01	112		chr10	126410952	126431040	7	11516	24467.2	4519.8	112
chr7	35791795	35845658	8	23092	51902.4	10131.6	113		chr7	13056461	13091008	7	9761	24794.4	5199.32	113
chr1	210022790	210065416	8	29884	47817.8	6133.88	114		chr15	80244440	80272945	9	10464	24465.8	4996.93	114
chr3	95371477	95404129	4	23321	45915.2	4277.41	115		chr3	95372935	95403695	9	12676	23780.6	4318.7	115
chr6	9116156	9163284	9	23332	48706.8	7846.81	116		chr1	51979958	52001033	5	8303	24643	5420.49	116
chr2	145181000	145239544	12	21332	54358.1	13512	117		chr17	59299782	59338857	8	10407	25476.9	6255.91	117
chr5	124032940	124091482	12	31312	48262	7540.21	118		chr17	63739007	63760690	8	11576	22812.7	3634.07	118
chr15	48376062	48422053	12	27112	48442.3	7947.24	119		chr7	19117239	19140204	10	12244	23472.5	4312.83	119
chr11	19731952	19764933	6	27848	49121.9	8720.18	120		chr16	21614729	21639970	7	9574	24312.1	5156.74	120
chr14	65453051	65487221	9	27755	47701.3	7384.14	121		chr5	59817663	59847180	9	12432	23265.3	4117.62	121
chr1	110527369	110563255	8	24248	51205.7	10923.7	122		chr6	132710312	132737040	9	14079	23202.6	4089.38	122
chr1	185743529	185805780	12	27715	48723.9	8478.59	123		chr3	149299601	149328859	9	9683	25940.1	6861	123
chr4	10553803	10611526	15	25723	50986.7	10921.2	124		chr3	150075474	150103657	8	10441	25497.2	6422.91	124
chr6	157094389	157140905	10	23245	48953.4	9010.15	125		chr1	90403448	90419199	5	7627	24582.6	5583.73	125
chr2	202266034	202306366	6	25915	44865.3	4968.9	126		chr11	48103434	48130879	8	8651	23879.9	5033.41	126
chr14	67976388	68012841	7	20567	49273.5	9412.16	127		chr13	49138197	49170009	8	9734	23906.7	5083.56	127
chr3	105826845	105859501	6	22023	45555.1	5701.74	128		chr2	12300393	12322498	7	9717	23844.7	5026.68	128
chr6	138973823	139015343	10	23725	47835.2	8021.66	129		chr6	9221484	9234349	3	11451	21763.7	2951.23	129
chr6	69342462	69369239	4	25287	44465.9	4956.42	130		chr1	185447126	185463233	10	12011	22469.3	3665.95	130
chr7	19110693	19161790	7	26867	46733.3	7761.63	131		chr8	49811559	49848248	6	11158	24493.6	5972.97	131
chr9	15833963	15882514	9	31721	41690.7	2815.96	132		chr6	69350730	69368314	10	14629	20699.9	2292.95	132
chr12	109194920	109251147	7	21566	51622	12909.7	133		chr15	60663545	60695592	6	8197	24586.5	6197.89	133
chr10	128322497	128360604	7	21646	47172.7	8471.19	134		chr9	15837180	15862967	14	22260	19678.1	1392.5	134
chr8	122354710	122382500	6	24794	42579.8	3901.72	135		chr5	71728350	71749627	9	14599	22055.7	3838.37	135
chr11	109929966	109970294	9	24390	45784.4	7488.91	136		chr1	94017222	94035836	3	8359	24354.6	6172.4	136
chr18	42260257	42321156	12	24713	48633.9	10365	137		chr17	66374693	66398360	8	10182	22630.4	4473.06	137
chr12	65051654	65085515	12	28117	47076.9	8824.18	138		chr8	9453989	9489353	8	9511	22668.3	4576.1	138
chr11	95927191	95992661	13	27049	47976.4	9755.03	139		chr15	81530792	81550509	5	9596	21515.2	3444.56	139
chr12	66278399	66342414	15	25437	47140.6	9275.77	140		chr8	49760713	49791156	5	9317	22074.2	4271.15	140
chr7	87084144	87135766	9	27124	45344.8	7480.03	141		chr3	146253878	146270959	4	10784	21860.3	4196.8	141
chr1	94005465	94052394	6	14837	52002	14167.9	142		chr3	149070671	149090917	6	7779	23007.6	5367.21	142
chr1	117219657	117254678	4	14254	52016.7	14365.6	143		chr6	14802595	14825889	9	9922	22965.6	5348.3	143
chr2	210527508	210564512	12	21432	45259.6	7826.35	144		chr11	19740623	19763659	10	9463	22176.8	4600.29	144
chr2	240117460	240198166	12	20378	52846.3	15616.6	145		chr1	110718692	110732237	2	6868	22375	4824.73	145
chr1	90376591	90419364	12	15250	50044.4	12883.2	146		chr4	143269712	143301643	9	8890	21393.8	3863.65	146
chr10	93317161	93370753	7	18654	48516.8	11495.5	147		chr14	50457078	50488268	11	9996	23286.5	5788.86	147
chr7	2640131	2700791	17	23129	49674.5	12987.3	148		chr7	155558838	155580851	10	9282	21508.9	4023.98	148
chr5	9140414	9170293	11	18413	45831.4	9157.91	149		chr13	78471378	78497117	8	11819	21672.2	4228.92	149
chr14	46166182	46216296	8	26189	41499.4	4876.09	150		chr8	17686381	17718976	6	8680	21724.6	4302.54	150
chr5	7751322	7789873	8	20233	47425.4	10813.6	151		chr7	95294484	95316991	8	11074	21296.1	3990.49	151
chr8	80700106	80746616	10	22290	46165.8	9678.73	152		chr14	44411373	44429056	9	13845	20229.4	2949.52	152
chr2	223102603	223156901	13	25721	44432.1	8269.59	153		chr8	29588000	29613559	7	10233	21645.9	4419.15	153
chr13	24120444	24157731	7	21936	43674.3	7565.53	154		chr10	82222560	82268022	8	6449	24144.9	6996.6	154
chr8	80835222	80881648	7	24376	42312.7	6239.65	155		chr9	130352363	130379339	8	9896	21081.7	3938.5	155
chr7	155538964	155581971	8	21337	44598.3	8592.8	156		chr13	78541204	78574148	9	9694	21123.7	3982.93	156
chr10	118706801	118749968	5	20008	42377	6384.4	157		chr2	97615926	97643369	8	8206	22009.3	4882.11	157
chr12	85354386	85392654	6	19231	40866.4	5120.26	158		chr1	108067288	108075679	2	8274	21001.8	4070.47	158
chr19	47594409	47618084	5	18026	43098	7396.07	159		chr10	111828959	111844550	7	10169	20148.2	3263.2	159
chr3	289651	339979	9	27150	40725.4	5118.36	160		chr3	126665968	126703240	6	7969	22676.3	5795.8	160
chr6	15308481	15371715	12	21818	48563.7	13000.9	161		chr6	1128642	1166030	8	7143	22668.3	5821.31	161
chr6	134577915	134637276	8	22160	45773.3	10269.5	162		chr12	92413876	92434363	9	10441	20067	3308.65	162
chr17	79354409	79376325	6	19521	43902.1	8509.98	163		chr7	46787333	46812449	6	8764	21614.8	4885.06	163
chr15	81530943	81558980	8	19928	41946.2	6639.16	164		chr6	15400260	15415776	5	9584	20793	4114.84	164
chr12	76225224	76284690	9	16257	46478.6	11245	165		chr22	46460982	46478182	10	10979	21076.9	4442.76	165
chr1	104898812	104945731	8	19501	43944.3	8923.99	166		chr6	110852897	110878665	6	8723	20658.2	4079.07	166
chr7	6288595	6312211	5	18285	41890.1	6966.72	167		chr1	90445693	90465472	3	7030	22409.6	5840.74	167
chr16	11639590	11681548	8	20252	46934.2	12029.4	168		chr5	14218829	14232635	4	7989	20165	3705.53	168
chr7	80376049	80411824	8	22696	39982.1	5190.95	169		chr8	12637621	12655742	5	9120	19875.1	3488.29	169
chr12	105104517	105164762	13	18503	48943	14410.6	170		chr16	48304254	48326445	5	10553	19858.7	3508.4	170
chr5	157833408	157865816	5	24878	38627.1	4119.06	171		chr4	159066728	159103655	8	10048	20442.8	4143.21	171
chr4	159695906	159750276	7	23319	40614.4	6116.62	172		chr1	119862820	119871124	1	8305	20003.5	3711.89	172
chr20	43643231	43689039	7	25672	40938.6	6541.38	173		chr11	36012711	36042178	12	8985	21066	4865	173
chr17	77921507	77968976	7	18410	46448.4	12147.3	174		chr1	183971138	184000368	6	7987	21603.9	5416.32	174
chr11	89307756	89350391	9	28992	38751	4502.26	175		chr3	76413319	76434143	7	11070	18589.6	2457.23	175
chr4	185708804	185767606	10	24129	44036.8	9837.57	176		chr6	10373874	10409960	7	7416	22842.4	6740.86	176
chr13	46675150	46717621	9	22551	39986.4	5869.49	177		chr6	150956669	150991540	11	8574	20748.2	4791.28	177
chr12	15045249	15082799	9	26745	38924.3	4881.5	178		chr5	56736892	56754957	10	11184	18375.7	2426.13	178
chr8	122623047	122651394	7	25745	38353.5	4354.1	179		chr6	148812462	148840706	7	6870	19697.4	3812.94	179
chr1	61543919	61599407	10	20616	42936.6	9033.45	180		chr18	20717578	20740643	10	10721	19238.5	3399.78	180
chr8	29579135	29614166	7	22860	41245.5	7430.08	181		chr15	48279050	48300853	6	10225	19533.3	3708.69	181
chr13	51879797	51909577	12	24151	40000.5	6256.78	182		chr1	63725037	63744342	7	9221	19370.6	3677.6	182
chr12	85668823	85705840	8	25418	37675.9	4016.34	183		chr2	100652427	100674784	6	8554	19490.8	3914.71	183
chr3	105546206	105597269	7	19323	42933.8	9416.02	184		chr8	109465511	109493686	5	9518	18612.4	3042.9	184
chr11	85451619	85506090	8	21019	42574.5	9232.83	185		chr12	94543516	94567360	8	10365	19809.6	4244.23	185
chr14	32937803	32983726	11	23775	39930	6603.73	186		chr13	49299103	49325522	7	11040	19071.9	3519.01	186
chr3	149070421	149105820	4	15336	42220.4	8913.47	187		chr22	29299697	29321658	4	8135	21374.6	5821.86	187
chr6	132797522	132834808	10	19909	39553	6308.79	188		chr5	33974719	33985753	3	7954	19170.5	3700.8	188
chr3	15795101	15853192	9	21118	38311	5123.63	189		chr12	85379190	85391579	6	9242	17850.1	2615.32	189
chr16	73086730	73130761	9	23065	41411.2	8282.23	190		chr14	65455597	65486849	7	6554	19585.6	4359.65	190
chr17	70567475	70616353	10	21130	46962	13871.6	191		chr22	32613868	32630103	5	8828	18647.5	3425.59	191
chr14	61855367	61907029	10	23548	41298.6	8276.25	192		chr12	20592123	20613814	7	9222	17791	2626.78	192
chr1	169447948	169499338	9	19076	39966	6978.76	193		chr15	42683635	42712542	5	8711	18731.7	3598.92	193
chr12	76087683	76119803	9	21192	38695	6256.98	194		chr11	87933178	87951291	6	9908	17643.9	2564.8	194
chr2	144358416	144375268	2	12995	36499.7	4086.61	195		chr5	9051840	9070053	5	7393	19120	4057.86	195
chr9	108035697	108072947	6	21989	36173.5	4108.68	196		chr22	34366236	34395491	5	6772	19878.8	4897.29	196
chr5	7392736	7426486	7	16618	41978.2	9963	197		chr1	94127137	94137262	5	8880	19218.3	4239.34	197
chr8	49787203	49848709	7	19368	42636	10677.4	198		chr17	59388465	59404020	8	8763	18028.2	3089.22	198
chr5	71723293	71749806	8	22962	37640.5	5782.49	199		chr14	46166562	46186455	5	9190	17716.7	2779.05	199
chr13	78383602	78430703	7	20079	37167.4	5322.41	200		chr20	10958669	10969648	7	8994	18386.5	3474.85	200
chr1	94496437	94538461	6	13980	48852.9	17023.9	201		chr12	109217843	109235313	7	9613	18544.4	3640.75	201
chr2	223641731	223671879	6	19280	37841.8	6071.81	202		chr18	10442097	10464934	10	12541	17253.4	2368.2	202
chr10	35442621	35501427	7	25154	37112.5	5363.11	203		chr12	20666758	20684714	8	13866	17004.3	2125.99	203
chr3	171846784	171875041	7	16583	38859	7216.84	204		chr2	7133088	7154429	7	7488	19441.7	4588.31	204
chr5	59473787	59528965	12	24243	36776.1	5186.73	205		chr2	223651312	223665991	8	10445	17924.5	3084.06	205
chr1	236291977	236336450	9	22368	40385.9	8921.28	206		chr15	60860732	60883414	6	7083	19654	4819.93	206
chr10	111334795	111378877	6	20671	37619.6	6303.73	207		chr17	79354915	79371766	8	8179	18751.8	3963.36	207
chr18	74814551	74846618	8	22542	37919.2	6657.11	208		chr8	81961189	81991419	9	9912	19767.4	5027.25	208
chr2	223594747	223613219	2	17099	35527.2	4303.98	209		chr21	38565588	38577478	2	11697	16787.5	2053.4	209
chr1	43521282	43539505	6	14607	40333	9144.3	210		chr15	52773431	52795777	7	7808	18609.7	3885.97	210
chr10	73595051	73649410	9	16149	45411.5	14231.2	211		chr1	145014016	145018925	3	4451	19233.5	4523.64	211
chr18	55762178	55789293	8	20345	36941.5	5816.17	212		chr11	111562916	111579085	5	8490	17908.8	3267.75	212
chr17	56437391	56495793	13	22375	40595.2	9472.8	213		chr3	69937060	69952646	5	8158	18184.2	3548.93	213
chr5	33966985	33985742	2	15447	37193.3	6075.39	214		chr12	28919595	28948413	7	6917	18083.3	3538.85	214
chr11	129116563	129167392	13	22212	37826.9	6729.76	215		chr3	149245865	149273453	4	5311	20108.9	5589.33	215
chr22	26869795	26887413	4	14385	37006.6	5954.88	216		chr4	159726895	159749986	8	9028	17733.9	3237.36	216
chr6	132708937	132737260	5	21872	35199.8	4197.47	217		chr11	129130055	129162232	5	6269	18900.8	4427.56	217
chr8	54766166	54803160	8	18427	38947.3	7975.91	218		chr6	138169555	138192441	6	9095	18437	3991.32	218
chr13	46615058	46637360	2	22204	33850	2932.71	219		chr7	130576054	130601624	5	6757	19116.1	4709.99	219
chr12	20517056	20548256	4	25681	33446.4	2542.8	220		chr15	53499472	53519741	5	9349	17141.5	2738.34	220
chr1	31255250	31297344	10	15830	44804.9	13958.4	221		chr6	9248543	9258452	4	9446	15659.2	1262.41	221
chr22	43329316	43359402	6	16312	40023.4	9218.35	222		chr12	100948915	100989478	6	7299	20273.4	5881.64	222
chr4	14836231	14891557	15	21337	39701.9	9023.67	223		chr3	118703731	118718211	6	7846	16938.7	2554.27	223
chr3	37493796	37536246	7	21453	38752.6	8120.69	224		chr11	130743226	130761438	7	9196	17274.1	2923.03	224
chr8	130628925	130668341	7	17973	36609.6	6046.41	225		chr1	28392644	28411965	7	6377	17504.8	3160.92	225
chr15	77819560	77870326	10	17234	46943.3	16433	226		chr19	17236411	17264804	5	5764	19701.9	5380.47	226
chr20	20053643	20070468	4	15757	36082.9	5612.82	227		chr11	78495089	78516296	5	7425	18089.6	3823.62	227
chr3	41239027	41289071	11	21772	35921.6	5454.8	228		chr3	106925247	106938918	2	7734	18490	4315.93	228
chr14	55562830	55600832	5	19219	39411.9	8964.67	229		chr7	95240477	95261106	6	7983	17326.3	3178.93	229
chr15	60845918	60885220	9	19913	37046.1	6634.18	230		chr22	41117100	41136016	7	6425	17875.6	3773.74	230
chr2	12295579	12322231	7	17564	37286.1	6908.2	231		chr19	47596581	47615426	4	8591	16881.4	2849.36	231
chr4	90742064	90761547	3	17676	34118.6	3740.74	232		chr2	198147875	198172641	6	5620	18661.2	4660.96	232
chr2	37780641	37814517	5	19377	36081.3	5762.31	233		chr12	65053142	65081689	8	6511	18915.2	4915.79	233
chr7	40606308	40644609	9	21415	37259.2	6951.63	234		chr20	1870444	1881610	6	9217	17121.9	3127.6	234
chr18	3825716	3874698	11	20839	35614.8	5446.8	235		chr1	185362600	185381110	3	6714	16907	2930.13	235
chr12	100948601	101000164	6	18259	36795.4	6651.63	236		chr5	66579691	66612019	9	8593	17531.5	3611.04	236
chr7	83766992	83826146	10	24919	35723.1	5720.19	237		chr7	48283940	48301793	5	7696	17303.1	3406.35	237
chr2	207986972	208030724	8	19612	38939.3	9004.16	238		chr13	46675877	46699683	7	8659	17011.8	3142.39	238
chr22	38364339	38388517	5	11154	41218.7	11387.8	239		chr19	17189520	17218938	6	4606	19524.7	5660.02	239
chr11	110187869	110247972	13	18841	40779.9	10992.8	240		chr22	32222711	32243279	7	7232	19360.7	5536.91	240
chr7	120601581	120670705	14	22423	37520.5	7734.98	241		chr8	122543540	122560729	4	7688	16786.8	3047.61	241
chr5	180232507	180260253	6	22013	36222.4	6492.56	242		chr9	27514366	27535621	6	10992	16215.4	2484.71	242
chr1	81357059	81385320	4	15191	33664.5	3939.58	243		chr17	78128818	78144578	5	7990	16945.2	3249.71	243
chr12	28919051	28949010	6	26638	32235.9	2525.54	244		chr11	12821519	12850826	7	4837	18580.6	4911.85	244
chr6	7124514	7153895	8	17767	38221.7	8546.93	245		chr12	13074051	13101016	4	5634	17052.7	3397.59	245
chr1	198125446	198176129	11	20745	36714.8	7044.94	246		chr2	238383231	238400917	5	8822	17739.1	4087.23	246
chr6	14797174	14827318	9	17081	38340.2	8756.83	247		chr18	42302247	42319495	9	8347	16652.9	3040.82	247
chr21	38564347	38581054	1	16708	33592.8	4054.79	248		chr15	33434667	33451435	11	10693	16156	2555.44	248
chr10	4355664	4426413	10	24904	34355.7	4952.43	249		chr20	9260574	9280367	4	6289	17134.8	3540.97	249
chr1	95688237	95699536	2	10352	33412.3	4046.17	250		chr5	25963225	25987447	3	6740	18297.3	4771.73	250
chr8	41435591	41470290	7	19762	35740	6377.68	251		chr11	85461423	85476206	4	8022	16744.7	3262.61	251
chr6	20192183	20219590	5	15555	36440.3	7109.38	252		chr2	54796024	54807717	6	9131	16551.4	3095.14	252
chr4	143260349	143302849	14	27972	32737.8	3595.5	253		chr11	128363328	128376041	9	10578	16084.5	2631.59	253
chr1	119861020	119871605	2	9839	33607.4	4477.45	254		chr3	194870776	194877501	1	6726	16498.4	3084.76	254
chr7	40335895	40372282	8	17439	35637.4	6527.83	255		chr13	30448050	30467150	5	5923	16557.8	3204.98	255
chr8	70614006	70638954	5	19600	33914.3	4812.47	256		chr2	7071712	7100491	7	7527	17137.9	3787.32	256
chr18	10442830	10467965	5	19431	33253.6	4245.3	257		chr6	157094691	157113308	4	10411	15800.2	2530.05	257
chr4	159060046	159103573	6	21505	32788.9	3808.61	258		chr6	70038597	70055008	6	8858	15434.5	2190.87	258
chr20	10466750	10494094	9	16619	35719.5	6786.78	259		chr9	108052130	108068846	9	9388	15833.4	2595.99	259
chr20	45962405	45989985	3	15083	36427.7	7661.72	260		chr6	140293385	140305382	4	9766	15587.7	2363.41	260
chr20	10897682	10921275	4	14117	33785.2	5110.24	261		chr11	104698180	104718071	3	8713	14972	1760.35	261
chr7	48283792	48306324	6	18345	32691.7	4082.8	262		chr13	24120985	24147865	6	7208	17297.3	4091.14	262
chr1	92027428	92058092	10	13614	39617.9	11177	263		chr11	78296935	78308218	3	7968	15897.7	2718.07	263
chr15	81279170	81308427	4	14726	35649.7	7399.1	264		chr8	136640008	136657723	8	9323	16127.7	2976.12	264
chr18	11805999	11860742	11	21116	35900.5	7707.81	265		chr2	85934487	85946571	10	9910	15856.6	2751.53	265
chr15	60665871	60712354	8	18172	38408.9	10263.4	266		chr1	178230108	178252273	7	7679	15841.3	2739.59	266
chr2	100888808	100909659	5	14272	34281.1	6224.02	267		chr6	132442386	132456813	4	8198	15859.6	2767.1	267
chr19	18474186	18500902	9	16858	35748.7	7739.63	268		chr1	14390603	14406284	3	6415	16683	3590.95	268
chr2	208173532	208204398	4	13066	35153.3	7191.78	269		chr10	104529398	104557201	3	5358	17663.2	4601.4	269
chr20	10957695	10981383	5	13825	33835.9	5874.62	270		chr4	90078896	90095935	7	8359	16294.4	3237.41	270
chr12	76409573	76432283	7	16952	32779.6	4918.99	271		chr6	134578175	134617956	6	6542	18589.7	5613.1	271
chr11	36012456	36042447	8	17352	33293	5551.33	272		chr4	55572667	55583777	4	10080	15159.6	2192	272
chr4	55565898	55586086	3	15967	31245	3597.5	273		chr10	118717300	118735278	5	7940	16861.6	3903.02	273
chr6	132431068	132459747	4	15266	31908.3	4267.44	274		chr2	106535166	106554708	7	6855	15932.6	3046.6	274
chr10	111675668	111700171	4	15259	33728.4	6111.05	275		chr10	62718996	62739771	7	8623	15953.1	3087.16	275
chr5	34864855	34894637	5	14483	34023	6522.26	276		chr14	61883904	61906517	5	7112	16690.7	3853.26	276
chr5	56733762	56755344	7	19755	32785.2	5298.38	277		chr6	108301249	108325815	6	7088	16122.7	3291.84	277
chr6	110849161	110879162	6	15093	34420.1	6951.23	278		chr7	106227836	106253505	4	6602	17162.3	4343.19	278
chr22	32613405	32633153	7	17688	32299.8	4846.16	279		chr6	22698849	22718164	7	6759	16653.4	3851.41	279
chr20	20086798	20126439	7	14808	34456	7052.13	280		chr1	16159654	16178142	2	6780	17583.9	4795.79	280
chr5	9533977	9548810	3	11536	33191.8	5795.25	281		chr20	9099175	9112054	5	6798	15251.3	2475.34	281
chr4	122585396	122632836	12	20439	33502.1	6119.76	282		chr2	100889184	100909366	8	7641	16773.3	3998.05	282
chr2	109208982	109254742	8	22902	32027.4	4662.94	283		chr7	35814637	35825322	4	8055	15094.7	2347.49	283
chr19	15391298	15413465	6	17600	35108.1	7813.87	284		chr4	108067702	108082029	7	11269	14586.3	1852.48	284
chr10	90282488	90312952	8	15532	31283.5	4021.25	285		chr2	37780935	37801047	6	6675	16467.7	3742.84	285
chr12	94538589	94567208	5	16525	33887.8	6691.12	286		chr2	223597752	223611676	6	7200	15617.2	2894.8	286
chr13	51040994	51064411	7	16743	29784.1	2601.63	287		chr10	83667012	83678703	4	9823	15469.5	2753.23	287
chr10	74003863	74039122	7	12733	39528.9	12347.7	288		chr1	157971532	157989905	7	7146	16783.7	4091.67	288
chr2	7115337	7155150	6	15708	35182.7	8093.98	289		chr1	185937603	185961009	5	7886	16185.2	3546.01	289
chr1	182973166	183016451	11	19049	33710.4	6622.6	290		chr8	12669457	12679475	5	8715	14538.1	1913.44	290
chr6	148812309	148873193	14	18314	37955.1	10892.1	291		chr13	98905273	98928123	9	6778	16061.3	3470.91	291
chr10	126410885	126432484	6	16768	33506.5	6462.42	292		chr1	90068685	90075431	1	6747	15408.5	2825.9	292
chr15	53489140	53521468	5	18183	31442.2	4461.26	293		chr1	116915838	116921800	1	5963	15184.6	2607.78	293
chr4	158913225	158978374	12	20400	32392.1	5492.06	294		chr9	27413213	27434117	9	8535	14885.7	2324.52	294
chr10	97558468	97585629	7	16070	31688.7	4793.92	295		chr1	63578150	63601542	5	5982	16718.3	4173.13	295
chr8	9449324	9505873	13	19407	32142.5	5259.06	296		chr18	14945332	14962879	14	12574	14325.4	1781.02	296
chr20	9048784	9071222	6	15957	32180.6	5483.85	297		chr15	99319767	99336547	4	5986	15726.2	3184.84	297
chr2	54786665	54824317	8	15720	34368.7	7688.54	298		chr5	66184098	66201868	9	10001	14550.1	2027.56	298
chr5	17109456	17133531	4	13398	34814.9	8159.02	299		chr17	17597156	17630072	7	5502	16313.2	3821.55	299
chr6	111900637	111928070	4	14664	32557.5	5906.32	300		chr1	109934554	109943082	2	5328	16227.9	3738.68	300
chr14	44411073	44438387	4	18364	29400.8	2750.52	301		chr1	234735094	234750471	7	10801	14388.3	1903.67	301
chr1	183970414	184000705	6	16820	33050.5	6448.95	302		chr11	12697964	12720147	7	6403	16007.3	3567.03	302
chr1	110719016	110733304	2	8019	34142.6	7551.21	303		chr2	18279632	18291371	6	7758	14865.1	2426.45	303
chr1	145012875	145019257	1	6383	32222.7	5639.14	304		chr8	54768111	54787769	7	7780	15643.8	3229.81	304
chr2	178254498	178297130	9	22608	30844.3	4314.36	305		chr6	126141835	126165951	5	6236	15535.5	3151.96	305
chr18	67888109	67927953	6	15707	30695.8	4227.45	306		chr11	134863578	134878277	5	7383	14693.1	2313.62	306
chr13	98904535	98954099	12	17005	35145.8	8693.53	307		chr4	55700690	55710643	5	9390	14681.7	2322.03	307
chr14	75599232	75643715	8	17827	32054.4	5671.58	308		chr21	43182130	43204674	5	7224	15843.9	3485.3	308
chr7	116648069	116675302	6	16736	29866.4	3488.55	309		chr7	17882124	17890737	3	8412	13703.3	1384.97	309
chr6	4006992	4037908	8	18104	31883.7	5506.14	310		chr1	8757850	8773802	5	6353	16058.9	3743.93	310
chr22	46460915	46478620	4	14503	32745.4	6418.06	311		chr8	126231309	126242936	4	8491	14154.7	1851.02	311
chr18	60792638	60861403	11	16418	37160.6	10899.3	312		chr20	49127822	49152603	5	5197	16070.5	3774.15	312
chr6	111789853	111826388	6	16365	31946.2	5692.15	313		chr1	182247797	182272219	8	6615	16721.7	4439.92	313
chr5	151096782	151138146	10	18456	34720.9	8541.67	314		chr16	87880385	87899149	9	6780	14583.4	2347.38	314
chr3	105716210	105744224	5	12916	30311.1	4221.71	315		chr16	19757028	19788702	5	5786	16144.2	3933.91	315
chr18	45414512	45462728	9	21070	31716.5	5631.63	316		chr3	157096615	157105859	5	6294	14591.7	2412.68	316
chr10	106000007	106023609	4	14357	30949.3	4958.78	317		chr6	20201887	20219582	4	6427	15276.1	3101.93	317
chr5	115987423	116018969	4	18187	29842.5	3861.23	318		chr6	110911150	110940285	4	2536	16537	4373.16	318
chr9	84127549	84181494	9	18592	32102.7	6263.01	319		chr10	90296845	90306688	2	9486	13789.1	1633.94	319
chr10	116425407	116458778	8	18690	32336.5	6520.69	320		chr11	59879489	59898625	8	6896	15335.6	3212.93	320
chr22	30579653	30609717	6	12828	36912.6	11102.6	321		chr20	10470008	10492690	3	4445	17376.7	5257.69	321
chr1	32953918	32966996	3	12779	30392	4587.76	322		chr2	235862051	235879447	5	6085	15793.8	3680.99	322
chr20	341148	364342	4	12588	35224.7	9451.56	323		chr10	25356173	25374421	11	8425	14324.7	2229.91	323
chr2	33976962	34015144	11	20151	31687.2	5956.39	324		chr7	104399866	104415240	7	6392	14852.8	2813.44	324
chr10	97472813	97522648	7	15465	34346.3	8671.29	325		chr7	116654375	116666202	4	8525	14362.7	2326.37	325
chr12	77777682	77804834	2	15781	29994.8	4371.47	326		chr20	43664098	43682606	5	7097	15357.9	3322.19	326
chr15	93443252	93461833	5	13250	29359.8	3753.36	327		chr1	6063499	6090931	4	5202	17235.5	5214.82	327
chr1	14389032	14407393	2	10609	31311	5721.29	328		chr1	160592552	160603942	6	6008	15318.4	3328.16	328
chr1	15497860	15517136	7	12917	35038	9481.86	329		chr1	46328626	46359042	5	6135	17224.6	5255.88	329
chr15	80244161	80274549	7	15055	32782.6	7238.42	330		chr13	49196835	49209493	9	9259	14703.5	2796.15	330
chr8	126220367	126245636	5	14536	28960.8	3426.48	331		chr20	9051813	9071196	5	5719	15880.5	3989.02	331
chr1	219909266	219946814	9	19863	30083.5	4648.44	332		chr7	30174620	30183363	2	8464	13841	1972.42	332
chr12	56355174	56367502	4	11818	29557.6	4134.81	333		chr6	160393489	160414546	6	4784	15142.1	3350.17	333
chr3	106924973	106939821	4	11964	29473.3	4075.78	334		chr8	82013148	82031265	4	6868	14118.6	2338.9	334
chr1	108066106	108075671	1	9566	29762.5	4383.64	335		chr4	15006358	15023619	5	7834	13898.6	2121.38	335
chr1	234734395	234767946	5	17345	29873.8	4556.23	336		chr2	63806907	63819160	4	8875	13513.8	1738.7	336
chr2	177533423	177592289	11	18899	30686.8	5398.01	337		chr2	177573479	177592313	5	7878	14513.5	2738.46	337
chr3	62907880	62956486	9	17007	31078.7	5823	338		chr15	55542312	55562688	4	7077	14069.6	2312.68	338
chr15	92078927	92116264	4	14593	32042.6	6799.07	339		chr6	15429774	15450039	5	5327	16155.3	4403.58	339
chr18	3594109	3626080	6	16556	30589.9	5351.95	340		chr1	70922878	70933290	2	5722	14559.1	2818.53	340
chr6	101828088	101877737	15	20187	31249.1	6062.14	341		chr3	105716743	105733108	3	4769	15119.6	3399.01	341
chr1	28392330	28415107	8	18202	29361.8	4209.19	342		chr5	59476098	59505752	7	6028	15245.1	3525.86	342
chr11	95860356	95893569	7	14441	30160.7	5078.27	343		chr2	202271221	202287323	6	7064	13712.5	2032.07	343
chr10	76677302	76714325	7	17043	31232.6	6153.22	344		chr7	6294468	6309859	6	5255	15486.4	3812.35	344
chr18	42358036	42417041	8	13800	32659.3	7588.04	345		chr15	68560876	68575919	3	6976	15423.6	3787.83	345
chr3	194869239	194877884	2	8577	30522	5522.43	346		chr2	65208856	65220068	3	7371	14082.3	2514.85	346
chr1	64081671	64117888	4	10153	32729.3	7757.68	347		chr8	70687973	70704350	6	7902	14007.2	2440.17	347
chr10	11545382	11595258	11	22531	29032.8	4069.88	348		chr12	60031436	60051254	3	5756	13171	1605.26	348
chr22	32221585	32243430	4	12219	33516.8	8571.98	349		chr12	83173950	83197933	5	4935	15572.2	4024.35	349
chr21	35896167	35934471	8	16384	31076	6143.96	350		chr15	26175241	26192551	5	6711	14415.8	2871.73	350
chr6	140292002	140306600	1	14599	27439.9	2583.85	351		chr1	227050045	227066695	7	6347	14265.7	2802.2	351
chr11	65238568	65272578	7	15676	32166.7	7346.16	352		chr22	38568084	38575300	2	5622	14543.1	3090.61	352
chr18	55710485	55740004	8	17264	30410.5	5602.71	353		chr1	61564210	61599046	6	4722	17104.5	5660.85	353
chr3	146253964	146273098	6	14592	28857.9	4161.65	354		chr10	128350319	128360298	5	8307	13610.4	2183.41	354
chr15	52773167	52795482	5	17029	28163.8	3543.62	355		chr12	77258966	77276029	3	5792	15532.4	4107.06	355
chr6	47029049	47062192	6	11181	32350.9	7785.29	356		chr3	151255758	151273546	5	5188	15436.4	4016.53	356
chr18	20718232	20741432	4	15718	29522	5022.8	357		chr3	185477613	185493161	5	6261	15618	4219.73	357
chr1	119818086	119842166	4	10055	31482.2	7055.44	358		chr6	37279778	37293592	5	6492	14542	3163.41	358
chr15	81447766	81488352	7	12268	35744.1	11360	359		chr4	69914381	69931236	6	5496	13851.4	2502.97	359
chr11	12696709	12728521	5	13807	30202.3	5866.13	360		chr1	171866635	171887142	6	5189	14572.3	3231.9	360
chr4	100906259	100945353	9	19858	28108.6	3788.21	361		chr5	157833496	157854851	5	6767	14004.6	2677.92	361
chr11	87932410	87951379	4	18001	26733	2439.41	362		chr8	130638346	130649238	6	8746	13629.2	2312.37	362
chr7	23502292	23518075	2	14042	28650.9	4371.89	363		chr6	126053878	126069822	4	8487	13386.6	2104.61	363
chr1	14318447	14347191	5	10545	30491.6	6217.33	364		chr7	48009900	48032814	3	4643	16227.7	5009	364
chr9	114658117	114701026	9	19342	29371.2	5179.12	365		chr15	48323644	48340414	4	6746	13390.8	2188.49	365
chr12	104878773	104917863	7	14849	32585.4	8419.99	366		chr5	17110487	17125427	3	4650	14940	3749.94	366
chr4	143315926	143340232	6	17531	26904.3	2790.33	367		chr20	9311599	9321300	3	6382	13842.4	2703.67	367
chr19	17227439	17264620	5	12074	35675.2	11611.6	368		chr15	65401611	65409928	3	8125	12681.8	1554.45	368
chr20	9093438	9126324	10	12543	29758.5	5712.3	369		chr17	56458677	56481827	7	5774	15163.2	4048.93	369
chr18	3441748	3467590	4	17188	28550.2	4669.65	370		chr17	63001704	63020912	3	4927	13881.6	2783.24	370
chr6	108878517	108938859	11	15863	33411.4	9534.04	371		chr11	78820404	78832780	7	7422	13478.7	2383.62	371
chr19	17178445	17203281	5	13393	33565.9	9703.43	372		chr15	79271411	79285796	2	6267	13767.9	2688.56	372
chr3	118603679	118630470	5	15675	28430.6	4570.54	373		chr10	117519545	117538822	5	7808	13212.5	2137.82	373
chr2	227483278	227521795	7	13026	30024	6185.83	374		chr7	40583031	40591474	5	7329	13045.3	1994.24	374
chr11	104697476	104731028	8	15505	26643.6	2825.08	375		chr7	5737159	5753366	3	6425	14490.7	3494.23	375
chr8	17686493	17722341	6	14684	29553.1	5735.68	376		chr12	20525642	20547458	8	6440	13087.4	2096.52	376
chr2	200661188	200709393	7	12139	32461.2	8667.26	377		chr11	74733605	74744098	5	7469	13340.8	2397.65	377
chr22	22191153	22223005	8	12465	33208.9	9428.19	378		chr8	49650877	49676684	4	5401	13747.4	2820.71	378
chr10	63828509	63856616	6	14782	29057	5438.7	379		chr8	76875758	76892323	3	7801	12554.6	1630	379
chr12	75946583	75966532	6	13388	27539.6	3923.97	380		chr22	24541441	24552623	5	5825	14560.1	3643.1	380
chr1	185362134	185381584	3	9363	27871.8	4378.19	381		chr7	23503005	23515599	3	5530	13796.7	2889.06	381
chr5	25962474	25996376	4	11526	28084.4	4695.43	382		chr1	90298385	90309006	2	5119	14850.3	3946.76	382
chr11	16101134	16149663	5	13854	27414	4032.76	383		chr11	126261673	126290806	4	4245	15067.6	4171.85	383
chr4	114038584	114069309	8	22333	26481.9	3133.95	384		chr4	186486826	186511332	6	7735	13213.6	2318.27	384
chr3	147945353	147990099	9	15555	30722.6	7445.73	385		chr1	93341629	93348849	3	6411	13276.9	2384.04	385
chr5	90303308	90340977	9	16926	26567.9	3363.84	386		chr22	38376743	38383884	2	6992	13720	2835.69	386
chr6	111842669	111877928	6	14743	29240.3	6053.97	387		chr6	30731181	30751117	5	4206	14814.4	3949.32	387
chr3	152879121	152909424	5	11802	30278.8	7099.99	388		chr11	13437034	13454737	4	8756	12893.1	2030.53	388
chr14	56310132	56336774	6	14606	27883.5	4782.24	389		chr1	156090421	156111618	4	5336	14337.7	3486.91	389
chr9	130352420	130378683	7	14123	29538	6442.31	390		chr11	36167596	36178650	7	6690	12943.1	2095.84	390
chr4	120125724	120155507	9	19034	26706.4	3615.66	391		chr6	135040958	135049387	2	7376	12431.9	1588.02	391
chr2	18273726	18291625	3	12972	26524.5	3445.56	392		chr3	167456510	167474950	4	6026	14385	3544.17	392
chr16	34741866	34759970	4	17477	24672.1	1719.88	393		chr9	75349095	75382374	9	5089	13414.8	2589.11	393
chr18	55980159	56019562	6	15223	29800.5	6903.41	394		chr6	47873881	47890963	5	4346	14442.8	3629.93	394
chr11	48097780	48131536	7	11128	31312.1	8479.51	395		chr11	125070752	125094493	5	4948	14249.3	3454.32	395
chr1	8757539	8778180	5	11571	28108.9	5298.54	396		chr12	105061051	105071087	5	7505	12913.3	2150.71	396
chr1	94127051	94138143	1	11093	28158.2	5355.22	397		chr7	29746405	29758647	5	7218	12294.6	1532.7	397
chr1	16159236	16178526	4	8907	30796.5	8001.49	398		chr2	112765520	112790997	6	5943	14048	3294.18	398
chr5	56593796	56644896	8	12667	30108.1	7394.17	399		chr1	236310668	236332806	8	5861	13676.9	2933.28	399
chr13	49137692	49170797	6	11212	29460.1	6799.77	400		chr3	190214038	190223020	3	4641	12914.3	2224.84	400
chr12	63094689	63119700	8	16598	28997.8	6360.3	401		chr3	147963623	147989123	4	3857	15710.5	5023.5	401
chr1	109933510	109943795	2	9746	26043.7	3433.13	402		chr19	14940542	14949459	7	6216	13132.1	2445.04	402
chr3	126665861	126703931	8	12624	32108.2	9570.8	403		chr17	62269221	62293934	6	5056	13997.4	3318.96	403
chr3	76582135	76631881	10	20812	25887.8	3392.68	404		chr22	26875948	26886442	3	5404	14216.2	3552.22	404
chr7	17880108	17891183	2	9755	24783.6	2340.15	405		chr1	144864434	144868271	1	3838	12873.9	2233.13	405
chr2	198147688	198175540	5	14825	27331.2	4890.81	406		chr12	44276924	44298655	4	6071	12743.1	2107.91	406
chr14	61937463	62004900	8	14414	33914.1	11511.5	407		chr5	165137339	165154292	4	5936	13155.5	2529.39	407
chr9	114566771	114612400	8	18618	27806.3	5493.73	408		chr1	38494580	38511669	2	5793	13806.2	3190.52	408
chr17	59390164	59409297	4	11533	27195.6	4894.22	409		chr2	37567826	37578355	4	9291	12171.5	1583.56	409
chr12	92501296	92539620	8	17695	27022.3	4775.17	410		chr15	75321256	75346971	4	3055	15251.6	4664.7	410
chr4	77115557	77135798	5	14584	26720.1	4479.33	411		chr21	35907068	35934245	6	5081	13716.2	3171.56	411
chr6	160390289	160421230	9	17881	27880.9	5736.46	412		chr3	15834460	15852545	3	8454	12462.4	1947.75	412
chr15	69275691	69298949	4	13498	27649.1	5551.68	413		chr2	12555657	12571101	4	5165	13277.2	2789.19	413
chr2	65206330	65220473	5	12977	25728.9	3677.18	414		chr21	43115287	43133397	4	5520	13184.1	2712.88	414
chr3	193677494	193690857	4	9614	27515.8	5485.51	415		chr2	224752204	224772313	5	3676	13631.9	3161.13	415
chr13	40133354	40175029	10	16736	26788.7	4767.62	416		chr16	48341199	48362062	5	6631	12430.2	1969.47	416
chr11	19677590	19715540	5	9694	33544	11578.5	417		chr4	182582832	182609921	7	5121	13173.4	2717.03	417
chr1	224894999	224928496	10	16120	27953.2	6009.36	418		chr9	77157680	77176261	4	8001	12248.6	1804.22	418
chr17	75092684	75108687	4	11498	26949.1	5064.95	419		chr6	73325987	73334841	3	7462	12674.5	2230.32	419
chr10	60751867	60794254	5	11340	27805.9	5929.94	420		chr11	95869335	95890068	4	5264	13520	3089.22	420
chr3	185645444	185662413	4	11887	27803.7	5939.15	421		chr20	10903220	10920120	3	4456	14096.3	3682.51	421
chr8	122542994	122573211	4	12871	26385.5	4550.68	422		chr3	193678563	193690355	6	4380	14135.1	3721.56	422
chr15	33137548	33177275	11	16927	27181.2	5347.25	423		chr2	210862994	210873797	3	5247	14393.9	3993.87	423
chr3	89153640	89173756	4	17444	24611.9	2836.36	424		chr2	55617857	55644884	5	3193	13502.7	3113.51	424
chr1	234630679	234698666	10	13973	31566.4	9803.73	425		chr5	60909566	60928988	6	4524	13084.6	2721.02	425
chr11	78297268	78308857	2	11363	24062.2	2371.11	426		chr3	118606794	118618952	5	5902	13151.3	2824.3	426
chr1	116915872	116923727	3	7531	25641.1	4005.26	427		chr1	95691446	95697584	2	5131	12268	1957.41	427
chr6	136173020	136204002	10	21635	24853.8	3250.01	428		chr11	85657237	85672861	6	6029	13321	3010.74	428
chr11	111561777	111579031	3	13735	24911.3	3326.57	429		chr9	134534015	134564169	6	5133	13852.7	3543.09	429
chr22	29299613	29322043	4	9959	29437.1	7866.2	430		chr9	15719294	15739141	5	7571	12019.3	1710.81	430
chr1	158958753	158987228	6	13146	26701	5148.28	431		chr18	46259493	46277134	5	3193	13449.5	3163.03	431
chr8	109594994	109633074	9	14968	25692.6	4143.1	432		chr12	96759475	96770335	4	7310	11936.2	1657.24	432
chr13	30446964	30467146	5	15032	26069.1	4591.4	433		chr5	79693868	79708085	3	6311	12475.4	2196.53	433
chr11	100678739	100704057	8	16017	25110.4	3686.3	434		chr16	68817020	68834766	8	6925	11985.6	1714.26	434
chr7	40580525	40593300	1	12776	24167.7	2751.74	435		chr13	40153730	40174421	5	5924	12689.8	2418.78	435
chr15	68559884	68576006	3	11011	25235.8	3820.91	436		chr3	89158886	89171756	6	10390	11866.1	1615.18	436
chr6	8981771	8995742	2	13813	24056.7	2644.71	437		chr20	11214604	11230857	4	5605	13990.6	3752.82	437
chr15	55536904	55564219	5	13438	26304.3	4916.7	438		chr20	15895871	15911065	4	4060	13518.1	3283.42	438
chr9	5886477	5910876	7	12766	25477.4	4108.79	439		chr11	121828201	121840525	7	6885	12259.9	2055.64	439
chr16	19755758	19789445	4	10111	28152.2	6814.88	440		chr5	41281330	41297142	4	5593	13544.6	3347.4	440
chr2	223716884	223771292	14	12930	30381.4	9075.25	441		chr9	89346622	89365986	7	7866	12180	2039.03	441
chr1	171866133	171888538	7	15447	25138.4	3867.1	442		chr11	10323916	10344601	5	5425	13728.6	3592.98	442
chr1	227049844	227067960	6	15524	25295.4	4047.11	443		chr1	81379326	81385427	2	5935	11601.1	1478.88	443
chr12	77257246	77276217	4	12736	26132.6	4919.18	444		chr7	40337090	40357840	4	5277	14070.6	3967.4	444
chr6	102045310	102072455	5	17457	23024.4	1870.29	445		chr4	90749128	90758119	4	7306	11949.9	1853.94	445
chr11	85656682	85680709	6	13376	24964.1	3844.32	446		chr1	92079797	92089743	4	4102	13577.3	3492.04	446
chr4	55699558	55711978	2	11711	23466.3	2348.62	447		chr2	219586980	219611247	5	4456	13036.2	2955.72	447
chr17	66272583	66291013	7	12381	26076.6	5053.51	448		chr5	113752937	113772554	4	7231	12488.2	2408.97	448
chr16	87880280	87906151	10	19355	26745.4	5756.3	449		chr6	8982192	8993346	4	5014	12420	2382.49	449
chr10	60015707	60051452	5	12148	26808.8	5822.86	450		chr8	70618695	70638486	5	4949	13210.5	3190.31	450
chr17	55501518	55538366	7	12737	29920.6	8943.01	451		chr1	8935208	8950043	2	5086	12768.5	2756.34	451
chr19	14940518	14952673	1	12156	24148.3	3195.55	452		chr1	11233785	11259123	5	4779	15268.7	5260.17	452
chrX	10568846	10617290	8	18537	24580.5	3647.83	453		chr2	54597341	54613450	3	5029	12684.2	2698.26	453
chr10	25354614	25375153	5	19830	23595.2	2680.34	454		chr16	73087480	73105469	5	6868	12340.5	2369.15	454
chr1	205151307	205192739	8	13992	29474.7	8597.14	455		chr6	146865949	146874699	3	8007	11580.6	1612.62	455
chr6	143160991	143208218	6	16052	26399.9	5582.23	456		chr2	222060742	222069723	4	7858	12056.1	2111.43	456
chr2	235860734	235879637	7	14336	26158	5347.66	457		chr10	17551716	17578576	5	4814	12006.4	2084.34	457
chr20	1869883	1880600	2	9328	25103.5	4378.97	458		chr5	156013172	156025064	5	6803	11729.1	1809.96	458
chr3	172364980	172396625	8	11417	27062.8	6341.66	459		chr8	81934385	81944592	5	6854	11727.8	1814.8	459
chr8	80776672	80795950	7	13577	25811.3	5099.03	460		chr6	157127492	157138402	3	6669	11865.7	1956.16	460
chr3	151989591	152021077	5	11993	26133.4	5535.24	461		chr20	15310286	15318315	4	7282	11570.6	1662	461
chr6	43593985	43609595	2	11320	26438.7	5877.16	462		chr4	143321060	143338704	4	6822	12165.5	2272.55	462
chr7	13056185	13091075	6	13520	24660.3	4144.93	463		chr12	1865954	1888904	7	5635	11846.8	1966.82	463
chr11	13428928	13455166	4	14301	23278.4	2768.11	464		chr2	207990896	208009201	4	3742	13254.7	3386.43	464
chr3	171772886	171823656	15	14597	27913.3	7412.42	465		chr1	94070851	94091999	3	3275	16057.7	6200.59	465
chr5	77859833	77893845	8	15954	24856	4367.14	466		chr14	55179332	55197798	6	5226	12407.3	2557.54	466
chr1	2476986	2492308	4	9328	26246.6	5764.14	467		chr11	109939472	109958910	3	6246	12774.7	2925.42	467
chrX	23822262	23865228	12	15294	25599.1	5173.11	468		chr1	32954968	32966438	5	6498	12802.8	2954.67	468
chr15	89653904	89687220	5	13900	28048.7	7636.03	469		chr20	45981781	45989499	4	6251	12290.1	2444.29	469
chr2	178013876	178040807	6	14869	23944.4	3576.44	470		chr2	223458953	223474206	4	6016	12501.4	2657.07	470
chr17	66444858	66472180	7	13349	26518.7	6163.84	471		chr5	56595115	56620992	5	4393	12990.3	3226.86	471
chr15	42683428	42715118	4	12367	27614.7	7272.85	472		chr3	185533399	185543077	5	5417	12618.2	2856.95	472
chr5	139553902	139572629	5	14029	23491.1	3198.57	473		chr1	185743924	185760572	4	5323	12863.9	3144.81	473
chr2	122624746	122651957	9	11298	26353.9	6068.05	474		chr1	198898912	198907260	3	7894	11223.1	1524.34	474
chr1	94070413	94093317	4	9925	30221.8	10018.2	475		chr4	14867352	14890838	5	3096	12503.9	2823.02	475
chr12	96750700	96771249	6	15223	23234.8	3039.2	476		chr6	151202128	151229201	4	4631	13384.9	3706.29	476
chr7	23095537	23115287	6	10884	24468.3	4327.23	477		chr7	95861105	95871810	4	6626	11329.1	1650.71	477
chr11	100596854	100633691	6	14484	24920.2	4884.59	478		chr2	12854388	12863237	2	7582	11567.4	1892.8	478
chr14	50456956	50486437	5	10514	27853.6	7830.15	479		chr1	158968524	158985998	4	5020	13475.9	3802.34	479
chr8	59456381	59480576	6	14120	23251.4	3256.65	480		chr7	23105694	23114689	3	6538	11722.3	2054.46	480
chr7	30174629	30186896	4	10908	23453.3	3507.14	481		chr3	149921061	149934642	4	4301	13039.1	3389.82	481
chr4	90407732	90424371	6	14142	22490.9	2547.43	482		chr6	140383272	140408268	5	4054	12393	2744.56	482
chr12	109078735	109096773	4	14884	23572.1	3632.85	483		chr10	63829312	63843275	5	5728	12230.2	2597.12	483
chr2	38404903	38445878	5	13084	26502.6	6564.19	484		chr5	310698	317305	3	6266	12014.2	2393.06	484
chr11	96008965	96046064	5	12514	23869.5	3936.2	485		chr1	64100425	64107414	4	5800	11228.5	1624.24	485
chr18	14945366	14965246	4	19390	22508.1	2584.4	486		chr4	77117797	77130191	5	5646	12292.4	2694.46	486
chr11	121828219	121842812	3	13785	22932.9	3014.91	487		chr5	124074431	124091315	4	7021	11867.8	2282.72	487
chr11	74733562	74747952	5	10220	24511.9	4614.87	488		chr2	100437905	100451051	6	5342	12400.6	2818.5	488
chr12	63309959	63338325	6	13140	24182	4288.94	489		chr7	98691851	98708266	6	5216	12260.4	2688.78	489
chr9	102709818	102736783	6	15004	22130.2	2300.11	490		chr3	147795304	147804606	3	4858	12088.9	2521.77	490
chr3	185532004	185543167	3	10456	23075	3328.81	491		chr13	46617774	46632857	6	7687	11003	1441.93	491
chr6	3322736	3358959	7	10418	29195.7	9461.45	492		chr5	116003989	116013109	4	8166	11238.6	1681.73	492
chr13	49660420	49699901	6	14964	23025.3	3292.72	493		chr20	15766794	15773137	1	6344	10611.8	1071.97	493
chr2	64211196	64243649	4	13234	23791.3	4059.87	494		chr16	34743391	34754984	8	8315	11056.2	1519.84	494
chr15	99189356	99215243	7	13741	25695.4	5977.31	495		chr17	57787254	57797925	2	5010	11172.5	1682.82	495
chr2	238383087	238400240	4	12720	23801.5	4111.57	496		chr10	29181074	29196589	7	6911	11490.4	2006.09	496
chr3	197679908	197698723	7	12395	27409.7	7719.79	497		chr2	145181583	145185813	2	3908	11592.3	2109.5	497
chr2	210296121	210317123	5	10547	24080.9	4408.32	498		chr1	165431015	165440325	3	5704	11156.2	1685.11	498
chr10	131660935	131689992	6	11342	25927.6	6264.69	499		chr3	111453690	111469943	5	4754	12223.9	2754.88	499
chr17	62251167	62295584	8	10585	28919.9	9287.59	500		chr4	185713027	185736377	5	4817	11969.2	2503.12	500
chr11	65184040	65197047	2	12437	24373.8	4778.77	501		chr6	112109600	112117222	5	7142	11448.2	1984.77	501
chr8	130002976	130021762	6	14934	21727.9	2152.88	502		chr5	87958403	87972114	3	5462	11812	2363.78	502
chr3	157093423	157107115	5	12066	23321.6	3750.24	503		chr12	76409600	76424047	5	4507	12022.8	2583.12	503
chr4	69900833	69934099	5	16598	23898.3	4341.21	504		chr15	92097475	92105615	6	7350	11192.5	1759.05	504
chr8	109465384	109493936	7	14524	22801.6	3246.36	505		chr3	173400910	173419016	3	5357	12138.3	2705.04	505
chr22	45618759	45642491	5	9120	28623.2	9079.86	506		chr2	37885153	37897827	6	4897	11283.7	1855.47	506
chr1	240492521	240520089	6	17843	21944.1	2406.69	507		chr8	17598959	17613944	6	5784	11665.8	2240.26	507
chr2	54673191	54712289	7	11338	27079.3	7542	508		chr7	116371030	116378146	2	7028	11234	1818.85	508
chr6	133927995	133968207	5	12639	24312.2	4781.21	509		chr2	21400699	21421323	3	6634	11495.8	2091.27	509
chr15	48278225	48300870	8	13319	23901.8	4395.39	510		chr10	63021295	63033504	3	5470	10841.6	1438.22	510
chr2	54734753	54774051	5	13866	26659.8	7175.81	511		chr22	46848783	46854611	1	5829	10998.6	1630.67	511
chr12	92413824	92434323	5	14143	23092.1	3618.07	512		chr1	52048934	52066284	5	4291	13208.6	3841.29	512
chr5	88108156	88132702	5	15700	22034.9	2565.06	513		chr12	76016182	76030870	4	4803	12030.9	2664.4	513
chr19	5946418	5968160	6	14391	25451.2	6057.32	514		chr12	15064837	15079997	5	5563	11442.8	2107.24	514
chr13	97845378	97877323	6	14087	23367.8	3999.51	515		chr7	80510761	80521199	6	7055	10811.7	1482.2	515
chr3	78746148	78789432	11	17166	22654.8	3306.9	516		chr5	139556780	139571896	4	6006	11287.1	1996.82	516
chr8	38644767	38670470	7	11749	24672.3	5328.23	517		chr3	120269542	120278780	3	5445	11374.7	2119.2	517
chr17	78128251	78144535	4	9867	24168.7	4872.17	518		chr19	15398714	15412021	6	5679	11434.7	2181.02	518
chr6	147522656	147551463	5	16005	22682.6	3399.23	519		chr8	37397646	37419857	6	4932	12153.9	2918.53	519
chr10	114383493	114400012	3	11100	22515.4	3250.94	520		chr18	11818064	11841380	3	3737	11893.5	2660.36	520
chr1	90068414	90075758	1	7345	22812.7	3578	521		chr10	60578210	60591483	6	6317	11255.5	2028.11	521
chr9	97791758	97821273	7	14815	22871.2	3642.15	522		chr9	5890889	5900370	4	6234	11167.7	1945.5	522
chr1	183773673	183813567	9	12063	25823.4	6658.31	523		chr20	52368154	52386363	5	4027	12196.4	2982.63	523
chr7	29746111	29763830	5	12377	21417	2285.75	524		chr12	65009021	65021708	4	5800	11377.7	2172.01	524
chr1	90445471	90465807	4	9848	25234.9	6106.9	525		chr6	15256636	15265306	5	6107	11284.9	2082.53	525
chr4	175433296	175450290	3	16683	20821	1740.19	526		chr9	109670255	109685192	5	7033	10541	1347.32	526
chr5	16454704	16474252	2	10261	23485	4421.76	527		chr5	14443446	14450476	2	4640	11649.4	2480.89	527
chr6	112109109	112117730	1	8622	21095.6	2045.76	528		chr3	185373068	185379610	4	4971	11733.1	2570.35	528
chr3	69337673	69356165	4	12203	23385	4338.22	529		chr14	55563439	55575555	4	5461	11149.1	1999.14	529
chr8	37530895	37566687	8	11746	27509.7	8468.39	530		chr9	27340351	27357093	6	5996	10945.9	1816.51	530
chr10	126723244	126749666	6	11636	26784	7754.86	531		chr4	175439113	175449251	4	7915	10477.6	1372.69	531
chr7	93901030	93918856	4	12681	21836.8	2816.51	532		chr17	76861865	76881027	6	5381	12077.8	2973.94	532
chr1	180930724	180957547	10	12737	25310.2	6308.77	533		chr12	77796066	77803738	6	6645	11041.5	1951.76	533
chr20	36704500	36729252	5	9498	25061.4	6066.72	534		chr1	110671275	110680479	2	4097	12466.8	3378.79	534
chr2	63806586	63819860	2	11828	21628.7	2725.15	535		chr5	5068717	5079674	2	4659	11614.4	2528.88	535
chr22	34364390	34400692	6	11252	26351.6	7449.17	536		chr6	45880479	45899000	5	3655	12720.2	3639.38	536
chr12	105057771	105071852	4	10610	23016.8	4139.81	537		chr3	42764584	42781473	4	3006	11724.3	2644.82	537
chr10	102116185	102135689	5	11060	23718.8	4860.4	538		chr17	78759577	78773057	5	5794	11358.2	2302.38	538
chr1	19957446	19978163	4	10102	25310	6480.28	539		chr2	178026566	178040089	6	4771	10888.7	1848.59	539
chr13	52179159	52219688	10	14918	24224.2	5410.62	540		chr15	76775117	76792703	4	5153	11555.8	2544.69	540
chr7	48112119	48128555	3	9522	22542	3737.55	541		chr7	120645707	120670338	5	2639	12862.3	3854.75	541
chr1	160592038	160610152	5	9911	23995.6	5198.72	542		chr1	99967403	99972212	2	4593	10667.8	1687.48	542
chr2	222048163	222071788	3	10926	21595.6	2799.56	543		chr13	47169770	47190253	5	4070	11704	2759.06	543
chr3	138488472	138508907	4	10181	24291.1	5509.28	544		chr1	63894109	63917592	3	4247	11887.1	2942.42	544
chr11	78102200	78128827	5	13303	23761.9	5003.21	545		chr10	111688191	111699656	6	4854	11568.2	2625.49	545
chr11	94655971	94672534	3	11654	23660.2	4985.46	546		chr1	5975392	5990556	3	5575	11491.3	2570.3	546
chr8	80671202	80680050	1	8849	21098.9	2428.78	547		chr8	20109165	20126310	4	4917	11334.6	2424.3	547
chr11	12820931	12869131	11	13209	27729.5	9080.88	548		chr2	45895592	45918235	4	3592	11975.9	3068.13	548
chr10	29516521	29547085	9	15674	22375.9	3768.54	549		chr21	44750493	44766751	5	3700	11556.2	2650.05	549
chr6	101890960	101915029	6	17131	20636.8	2043.46	550		chr2	37861678	37869675	4	6528	10604	1707.36	550
chr3	104301738	104336267	8	10848	23106.8	4544.02	551		chr3	748171	758648	5	6816	10075.7	1194.38	551
chr16	68814613	68834663	4	11832	23129.7	4567.39	552		chr13	31594343	31604987	5	6815	10716.4	1837.15	552
chr1	157971141	157989994	3	11871	24150.7	5620.08	553		chr7	26696990	26707407	5	4654	10826.4	1957.35	553
chr12	66024557	66044114	3	12264	21935.1	3406.83	554		chr6	17860180	17870061	5	5574	11285.1	2439.62	554
chr1	165429760	165451633	4	12340	23189.8	4685.2	555		chr17	77923592	77935780	5	5604	11004.5	2175.56	555
chr2	145732073	145766198	5	8895	26074.9	7637.18	556		chr7	116439975	116450461	6	5278	10962.1	2145.44	556
chr15	59022436	59042065	4	12056	22522.3	4127.98	557		chr1	48034648	48054559	5	3971	12701.2	3888.62	557
chr5	123985581	124014984	8	12658	23010.8	4654.49	558		chr4	190605562	190619713	3	2987	12553.4	3769.83	558
chr2	219583689	219611553	4	11046	24013.2	5678.68	559		chr3	78920711	78938528	6	5831	10586.9	1804.86	559
chr5	113751064	113773598	3	13613	20735.8	2431.42	560		chrX	133307084	133322932	7	7595	9637.17	868.47	560
chr1	182247400	182274119	6	12736	25190.7	6890.83	561		chr8	125452852	125466514	4	4107	10974.7	2214.61	561
chr5	171863123	171881426	5	13366	22280.2	3993.71	562		chr10	652969	672324	5	4937	10260.1	1500.01	562
chr8	82123392	82148089	6	11118	21706.2	3432.88	563		chr2	227507209	227518082	5	5992	10830.6	2074.57	563
chr15	93351468	93389412	6	10150	26925.1	8670.2	564		chr3	170833825	170850151	4	5360	11903.3	3160.71	564
chr17	57785018	57800840	4	10546	21271.1	3037.82	565		chr11	65184537	65193843	5	5567	11217.5	2484.7	565
chr1	90297311	90309827	2	8008	22848	4624.66	566		chr13	95126847	95134947	3	7221	10483	1753.65	566
chrX	10521689	10550969	3	14528	20774.2	2562	567		chr1	111791986	111797258	3	4907	10816.6	2099.84	567
chr3	79041848	79067847	4	16331	21527.2	3320.07	568		chr17	74625149	74634224	5	6105	10323.7	1616.26	568
chr6	134489851	134509002	4	12230	22228.6	4033.2	569		chr20	20195682	20212842	4	5099	13012.4	4305.44	569
chr10	99897168	99920454	9	12684	21267.1	3169.22	570		chr11	126226778	126243402	3	4610	10963.5	2265.85	570
chr1	63725448	63744361	3	9646	21931.5	3846.9	571		chr10	29532478	29546547	7	6312	10129.7	1435.04	571
chr10	104517951	104563154	7	9132	28075.6	10003.4	572		chr18	3850136	3859042	3	8605	9593.54	908.412	572
chr13	51085046	51106327	6	12883	21523.6	3464.55	573		chr19	35877606	35891421	7	5706	10647.2	1992.12	573
chr10	29181366	29198293	3	15128	20033.1	1987.23	574		chr11	12744555	12754327	3	5010	10465.8	1817.59	574
chr4	124503918	124538940	5	11418	22470.1	4426.78	575		chr1	230238684	230251954	5	5658	11092.4	2465.57	575
chr13	33922309	33948238	4	12862	20841.7	2821.08	576		chr4	90178414	90209598	4	4439	12626.4	4007.14	576
chr1	178229709	178252584	6	14451	20180.3	2182.28	577		chr8	36677061	36692377	4	5162	10538.9	1925.22	577
chr1	8609710	8632931	5	9354	22689.2	4704.57	578		chr20	20122137	20127078	1	4942	10140.9	1535.66	578
chr2	43763477	43804911	4	10748	22556.7	4586.74	579		chr1	119835911	119841023	2	4861	10898.3	2309.09	579
chr11	95766612	95801615	6	12341	23151	5183.94	580		chr2	145527257	145534118	3	4611	10958.4	2386.26	580
chr2	40501072	40532019	9	15378	22142.6	4202.6	581		chr20	16084577	16093064	3	4521	10995.8	2435.77	581
chr21	43180370	43204730	5	12080	23475.7	5551.64	582		chr17	499819	510479	5	5695	10086.5	1541.44	582
chr5	79693745	79708120	3	13622	20990.4	3094.94	583		chr10	93350290	93368529	3	3936	11798.8	3266.6	583
chr20	11185248	11231017	7	11559	26445.3	8600	584
chr10	60577059	60594441	4	16598	19871.1	2068.46	585
chr2	210866423	210877719	2	8333	21845.3	4046.23	586
chr3	196062237	196067727	1	5491	21408.8	3620.11	587
chr8	101281068	101322887	5	10723	22578.1	4792.46	588
chr21	43115200	43133989	2	8652	22443.5	4670.95	589
chr6	135040932	135050085	1	9154	19297.3	1539.53	590
chr7	7176103	7199866	3	9547	20757	3013.15	591
chr1	51979635	52001183	4	9614	23463.6	5746.85	592
chr2	38102151	38119652	4	8495	21773	4060.23	593
chr10	64502207	64533343	4	11946	23479.7	5769.5	594
chr1	94692020	94713781	5	13401	23606.3	5912.46	595
chr2	64938504	64979442	9	13797	24042.9	6361.77	596
chr12	23123604	23155036	9	17059	20050.5	2420.26	597
chr11	69354776	69384690	5	11367	24900.4	7278.08	598
chr6	170465789	170493107	11	11593	25179	7558.89	599
chr13	74248431	74266495	4	10930	19958.9	2351.93	600
chr21	37692514	37730222	5	11326	23314.9	5712.76	601
chr6	10404851	10415364	1	10514	20702.2	3103.44	602
chr6	73325991	73335877	2	9624	20368.1	2790.82	603
chr15	48164655	48177817	3	10128	19571.9	2054.59	604
chr8	136639659	136659897	5	13753	21332.9	3839.15	605
chr3	69839375	69873383	8	11941	22918	5441.28	606
chr15	26175090	26193677	5	10223	20709.6	3241.57	607
chr6	141621595	141649001	6	12476	20116	2655.64	608
chr14	56259739	56275115	4	11268	21847.8	4394.46	609
chr4	71040069	71059561	5	14302	19439.4	1986.23	610
chr2	114647599	114677323	8	16680	19287.9	1851.81	611
chr9	75335687	75382526	7	13019	20890.2	3475.45	612
chr8	88917293	88952369	8	12934	21512.1	4107.4	613
chr15	31373004	31396510	6	10488	22683.3	5281.8	614
chr5	87956357	87972956	2	12625	20300.6	2901.51	615
chr6	56664883	56685363	5	10856	20187.1	2801.66	616
chr1	99946560	99972225	3	6848	22734.1	5374.25	617
chr17	78756336	78773493	3	9118	22271.5	4925.77	618
chr12	24870123	24914015	7	13680	20203.5	2901.26	619
chr2	112765400	112792031	6	11333	22042.5	4750.97	620
chr8	37477076	37495198	6	10441	22163.2	4883.88	621
chr4	182580065	182616626	6	14589	19849	2592.17	622
chr9	73177922	73230162	8	10938	24458.8	7203.9	623
chr3	105656504	105689484	7	10745	22558.3	5336.16	624
chr1	8497998	8524725	4	10082	24147.8	6949.02	625
chr10	89986408	90006261	2	10899	20871.5	3690.67	626
chr12	96819073	96840439	10	11780	22615.9	5448.33	627
chr9	16723227	16735652	1	12426	18354.2	1194.04	628
chr5	123870127	123891686	3	10877	20332.3	3175.64	629
chr1	154391171	154406382	4	10903	21899.3	4750.4	630
chr10	74055987	74082243	5	10112	24426	7280.79	631
chr5	113698585	113729931	4	12604	20158.6	3018.62	632
chr18	9073507	9107056	5	12299	21330.5	4207.04	633
chr1	66633547	66650474	5	10748	20197.3	3099.33	634
chr5	5342629	5363185	4	8271	23503.7	6417.58	635
chr4	17482914	17497198	3	10855	21007.5	3922.39	636
chr8	101513161	101551762	8	11679	23079.5	6006.32	637
chr12	50196563	50227137	4	13093	22092.8	5032.48	638
chr8	130316000	130333637	4	11893	19201.4	2165.82	639
chr3	190275097	190287964	5	9173	20426.4	3408.47	640
chr11	106867232	106893692	7	15037	20120.2	3103.76	641
chr20	49127036	49152989	6	9517	22319.6	5317.77	642
chr15	98653992	98677741	5	11011	22012.9	5015.79	643
chr1	5974412	5991192	2	7977	21731.8	4743.71	644
chr13	49299264	49325052	5	12213	21014.6	4071.93	645
chr8	29197467	29211172	6	11905	21433.2	4492.5	646
chr7	104922059	104950401	7	13660	21106.3	4205.95	647
chr15	79271650	79286755	3	7862	22938.5	6094.87	648
chr1	236079420	236100970	4	10259	20496.2	3659.19	649
chr8	72500594	72535826	4	10988	19934.3	3114.51	650
chr2	41948891	41965273	6	10760	19709.2	2917.63	651
chr5	124219100	124260174	6	12644	20163.2	3384.5	652
chr4	139136509	139165797	5	14240	19245.1	2483.62	653
chrX	21943346	21978753	8	14362	20398	3668.17	654
chr1	185930915	185961530	8	11740	21158	4445.3	655
chr8	124545259	124554342	1	9084	19198.7	2489.65	656
chr6	165589844	165600172	4	9598	18871.3	2175.08	657
chr12	109114641	109126413	2	11332	19240.2	2556.88	658
chr2	224751200	224771650	3	9768	20094.2	3451.96	659
chr15	38488393	38521782	5	11366	21075.1	4444.08	660
chr12	27701952	27729967	4	13897	19316.3	2686.64	661
chr3	185372529	185379939	2	7291	20822.8	4202.21	662
chr2	153191703	153213336	3	10000	20640	4025.9	663
chr9	27339659	27373641	8	10877	20820.8	4244.35	664
chr17	499530	512644	3	10748	19425.8	2868.03	665
chr5	156012971	156027092	3	12512	18624.2	2084.26	666
chr4	186481041	186513175	7	12914	21639	5102.88	667
chr1	63876802	63918080	5	10646	22153.9	5617.94	668
chr1	118626822	118654067	4	8336	22373.6	5846.78	669
chr1	45869210	45880402	2	8038	19455.1	2944.62	670
chr15	48566029	48580002	3	10801	18999.1	2491.39	671
chr15	82458019	82479157	5	10305	20495.4	3992.97	672
chr4	90177967	90224835	8	12427	22107.6	5614.79	673
chr2	100654337	100684640	4	9663	22106	5633.33	674
chr7	80487828	80522341	4	11408	20290.2	3824.04	675
chr20	9260184	9283469	6	13232	20441.9	4007.35	676
chr14	45400404	45437316	7	10877	20585.8	4156.29	677
chr2	161148555	161186464	6	12481	19921.2	3502.79	678
chr11	22471772	22485648	4	12863	18119.3	1783.07	679
chr19	42950994	43003151	8	10958	24560.7	8225.16	680
chr9	115972711	115996237	4	12951	19401.9	3067.79	681
chr7	95924901	95949218	8	12893	20314.4	3983.12	682
chr4	124317280	124340660	4	12315	20305.5	3979.28	683
chr1	43415052	43427874	5	10018	22060.3	5736.56	684
chr22	41121404	41137112	7	9255	22151.4	5844.95	685
chr2	7071678	7101641	5	12788	21210.8	4904.94	686
chr7	48009903	48033209	4	10452	21320.3	5020.11	687
chr13	95123061	95135017	4	10736	18714.7	2423.48	688
chr9	12809420	12823844	3	12400	18159.8	1895.31	689
chr7	155250720	155266652	3	9524	21149.7	4935.73	690
chr4	124359344	124376838	6	11675	19416.6	3213.65	691
chr6	108301253	108326009	8	10128	21495.6	5322.54	692
chr19	45594246	45607130	4	11599	20629.9	4482.34	693
chr6	22698833	22719177	5	11367	19245.4	3108.56	694
chr3	78955667	78969241	2	12102	17430.4	1315.32	695
chr11	109895233	109906919	2	10727	19249.2	3162.23	696
chr22	38000294	38008143	2	6537	20345.4	4272.21	697
chr6	125620750	125638726	6	10076	19818.5	3746.2	698
chr22	26063655	26072404	3	7458	19251.3	3182.89	699
chr11	104634313	104655424	5	10979	18858.5	2790.87	700
chr10	23324376	23357178	7	11578	18828.3	2794.73	701
chr18	3745352	3773421	9	14585	19159.9	3146.53	702
chr10	29224042	29238864	4	13637	17243.9	1264.32	703
chr10	113973070	113990613	3	8326	20753.4	4783.98	704
chr3	149672009	149690507	5	10108	18888.3	2928.23	705
chr13	111161426	111206902	7	10982	24320.6	8422.16	706
chr6	36390329	36414677	4	7918	21229	5351.69	707
chr15	48323525	48340756	4	11459	18039.1	2174.55	708
chr2	97531317	97543221	2	8637	21808.1	5990.09	709
chr8	11710879	11736457	5	10871	22736.3	6934.2	710
chr20	5127318	5157679	4	8104	24710.8	8917.03	711
chr11	94796697	94829810	3	9277	21493.6	5702.06	712
chr18	46258783	46278194	7	11450	20542.7	4771.22	713
chr6	17858390	17870611	3	11552	18335.2	2568.85	714
chr2	210446787	210458333	2	7782	18465.5	2699.45	715
chr3	147794486	147807733	4	11450	17857	2095.68	716
chr1	6063389	6091736	5	7704	25240.2	9513.25	717
chr7	130740441	130766949	6	7938	20472.1	4763.49	718
chr17	41603665	41615199	3	9967	19673.5	3975.77	719
chr3	236683	253469	7	14063	17882.1	2197.29	720
chr3	118733215	118753731	7	11114	18780.3	3099.97	721
chr2	23742931	23784546	5	7795	25056.4	9388.34	722
chr20	15766360	15781055	4	8036	17907.3	2248.34	723
chr11	124924323	124953902	3	9763	21690.3	6040.03	724
chr5	104221984	104248003	5	13397	17929.7	2284.47	725
chr2	25736553	25752789	3	11428	18487.9	2852.67	726
chr6	146864926	146874931	1	10006	17000.5	1376.69	727
chr5	9051907	9071511	4	9320	22044.7	6441.87	728
chr1	39637893	39672368	7	9473	24477.2	8908.34	729
chr1	236021719	236046958	8	14209	19345.7	3800.99	730
chr14	56681860	56691365	2	9447	17082.4	1555.97	731
chr3	41306393	41333587	5	9221	19008.6	3494.43	732
chr13	76588119	76620517	6	11283	18661.2	3171.76	733
chr3	745865	759127	4	11493	16402.4	948.233	734
chr7	30587955	30604013	2	7320	19785.1	4345.29	735
chr8	17934814	17943867	1	9054	17570.1	2152.8	736
chr5	155896533	155909638	5	10869	17963	2556.79	737
chr1	144864019	144868562	1	4544	19037.9	3636.22	738
chr15	90937702	90974111	7	9531	21266.5	5865.49	739
chr3	151255464	151274754	4	10221	18998.7	3607.23	740
chr15	40371422	40395780	6	9448	21279.1	5894.64	741
chr1	198897997	198907269	1	9273	16443.9	1069.06	742
chr3	154782161	154791402	2	7915	17203	1828.79	743
chr22	30390467	30411436	4	8719	20805.4	5441.46	744
chr1	249200875	249223520	5	9186	19345.6	4003.64	745
chr4	86598043	86609948	4	10082	16837.2	1504.79	746
chr11	16416790	16441016	4	11099	17949	2626.1	747
chr10	643885	678038	10	11199	20372.3	5061.47	748
chr13	30145184	30169799	5	8770	20103.1	4854.08	749
chr11	10323768	10339140	2	9974	19533.2	4290.33	750
chr4	157489158	157512322	4	14664	16932.9	1695.6	751
chr4	189320324	189351105	7	12439	18256.2	3047.32	752
chr6	128334924	128352102	8	12607	17483.8	2303.57	753
chr4	190605529	190629146	7	7892	20700.3	5521.65	754
chr5	137989209	138005171	5	10965	19719.5	4555.55	755
chr12	47472684	47504510	5	14587	18096.3	2953.45	756
chr7	22796091	22807623	2	6869	16708.7	1566.05	757
chr4	66517066	66537429	5	10046	17324.8	2195.13	758
chr15	75321006	75347568	8	8633	23170	8042.97	759
chr6	36783707	36800202	5	6871	20879.4	5760.05	760
chr7	27729949	27741062	3	9722	17498.5	2380.4	761
chr1	70916680	70933251	3	7303	18218.2	3100.43	762
chr22	41047127	41066499	4	6678	21719.9	6609.73	763
chr20	11020090	11032364	4	8544	17151.7	2059.58	764
chr1	84542150	84555925	3	8177	18322.1	3253.66	765
chr8	17552719	17583029	3	13616	19704.5	4649.55	766
chr9	22202022	22215059	2	12568	16261.1	1218.96	767
chr15	65400004	65409595	3	9347	17616.7	2598.2	768
chr15	23806277	23825312	5	13763	17639.7	2630.64	769
chr6	15249087	15265281	5	8192	19311.3	4304.37	770
chr1	38481266	38511547	3	8151	22919.7	7927.57	771
chr5	140873779	140914583	7	10184	22034.2	7055.01	772
chr4	186203849	186230310	5	10797	18932.8	3958.57	773
chr15	99256759	99272867	3	9994	19137.9	4168.75	774
chr18	55868525	55893784	8	11229	18537.6	3579.2	775
chr11	78495375	78520337	8	10709	20037	5119.71	776
chr10	106087716	106109939	3	8449	21047.4	6133.55	777
chr6	45395214	45429991	11	11368	19836.8	4955.72	778
chr3	149957278	149974744	7	8711	20180.2	5299.18	779
chr6	151201899	151230502	4	8191	20050.7	5191.44	780
chr12	19584587	19604321	6	11850	17865.2	3009.43	781
chr1	22023168	22036391	4	7015	17709.6	2868.07	782
chr1	33468425	33478563	2	7105	18345.7	3510.79	783
chr6	37278733	37294111	5	10019	19582.3	4762.57	784
chr3	190212662	190223234	2	7063	17466	2653.57	785
chr4	160148914	160194785	6	10755	18582.3	3770.6	786
chr7	93799440	93816164	4	9091	16708.9	1899.85	787
chr17	76849171	76881456	6	8260	22677	7877.54	788
chr5	34035536	34044237	2	8487	17343.7	2551.13	789
chr10	111756217	111777023	4	10379	19243.5	4475.37	790
chr6	41673887	41692291	4	8032	20485.5	5719.96	791
chr22	24541069	24553053	3	8178	19615.4	4852.32	792
chr13	100952635	100987522	7	11014	18357.5	3600.34	793
chr1	221880783	221892873	2	11945	16368.7	1627.31	794
chr13	39976834	39993730	5	11237	16662.8	1937.97	795
chr6	18387165	18398423	3	6386	17063.8	2365.31	796
chr13	49197178	49209658	3	11259	16959.1	2265.12	797
chr6	70038345	70054944	5	9086	16823.1	2169.49	798
chr4	141014434	141042914	5	9880	18227.2	3634.05	799

## Sheet: Table S5
Table S5. Top enriched biological processes from GO analyses of 1,080 genes associated with super-enhancers in control (DMSO-treated) 501mel cells.
GO biological process	Fold Enrichment	P-value
melanocyte differentiation (GO:0030318)	12.55	0.00023
pigment cell differentiation (GO:0050931)	10.23	8.32e-05
developmental pigmentation (GO:0048066)	10.21	4.48e-07
semaphorin-plexin signaling pathway (GO:0071526)	6.78	0.0319
pigmentation (GO:0043473)	5.9	1.89e-06
neural crest cell migration (GO:0001755)	5.81	0.00751
mesenchymal cell development (GO:0014031)	5.22	0.000372
stem cell development (GO:0048864)	4.95	0.00169
neural crest cell development (GO:0014032)	4.91	0.00405
neural crest cell differentiation (GO:0014033)	4.67	0.0036
homophilic cell adhesion via plasma membrane adhesion molecules (GO:0007156)	4.65	3.23e-08
mesenchymal cell differentiation (GO:0048762)	3.93	0.000234
stem cell differentiation (GO:0048863)	3.88	0.000295
mesenchyme development (GO:0060485)	3.29	0.00044
cell-cell adhesion via plasma-membrane adhesion molecules (GO:0098742)	3.2	7.32e-05
Analysis Type: PANTHER Overrepresentation Test (Released 20181113)
Annotation Version and Release Date: GO Ontology database Released 2019-01-01
Analyzed List: upload_1 (Homo sapiens)
Reference List: Homo sapiens (all genes in database)
Test Type: FISHER
Correction: BONFERRONI
Bonferroni count: 8749

## Sheet: Table S6
Table S6. Super-enhancer-associated pigmentation genes with significant expression changes following AZD6244 treatment.
Pigmentation genes	log2 Fold Change	Associated with super-enhancers under DMSO	Associated with super-enhancers under AZD6244	SOX10 binding at super-enhancers (*= novel SOX10 recruitment)	Super-enhancer coordinates (GrCh37/hg19) under control (DMSO-treated) conditions	Super-enhancer coordinates (GrCh37/hg19) under AZD6244 treatment
TFAP2A	1.4677	X	X	X*	chr6:10404851-10415364	chr6:10373874-10409960
TYRP1	1.24987	X	X	X	chr9:12666154-12711109	chr9:12666483-12710844
STXBP1	1.23263	X	X	X	chr9:130352420-130378683	chr9:130352363-130379339
ZEB2	0.982584	X	X	X*	chr2:145181000-145239544; chr2:145263583-145282941	chr2:145266686-145282624; chr2:145181583-145185813
PPARGC1A	0.91511	X	X	X*	chr4:23879738-23972902	chr4:23888822-23956488
DCT	0.904194	X	X	X*	chr13:95123061-95135017	chr13:95126847-95134947
ETS1	0.820255	X	X	X*	chr11:128361101-128424432	chr11:128363328-128376041; chr11:128389051-128424039
PSEN2	0.73027	X	X	X*	chr1:227049844-227067960	chr1:227050045-227066695
SNAI2	0.690671	X	X	X*	chr8:49787203-49848709	chr8:49811559-49848248; chr8:49760713-49791156
ANXA2	0.583151	X	X	X	chr15:60665871-60712354	chr15:60663545-60695592
MYO10	0.483784	X	X	X*	chr5:16970725-17025722	chr5:16970657-17025533
MYO5A	0.46848	X	X	X*	chr15:52773167-52795482	chr15:52773431-52795777
KIT	0.460693	X	X	X*	chr4:55565898-55586086; chr4:55699558-55711978	chr4:55572667-55583777; chr4:55700690-55710643
SLC45A2	0.450428	X	X	X*	chr5:33966985-33985742	chr5:33974719-33985753
MITF	0.426948	X	X	X*	chr3:69839375-69873383; chr3:69935536-70051538	chr3:69937060-69952646; chr3:69968207-69996242
KIF13A	0.406825	X	X	X*	chr6:17858390-17870611	chr6:17860180-17870061
IGSF11	0.406665	X	X	X*	chr3:118603679-118630470; chr3:118643537-118720279; chr3:118643537-118720279	chr3:118606794-118618952; chr3:118703731-118718211
EDNRB	0.283948	X	X	X*	chr13:78383602-78430703; chr13:78459848-78574300	chr13:78471378-78497117; chr13:78541204-78574148
SCARB2	-0.333392	X	X	X*	chr4:77115557-77135798	chr4:77117797-77130191
MLANA	-0.346814	X	X	X*	chr9:5886477-5910876	chr9:5890889-5900370
NSMCE2	-0.457008	X	X	X*	chr8:126220367-126245636	chr8:126231309-126242936
MLPH	1.4562	X	X		chr2:238383087-238400240	chr2:238383231-238400917
RAB32	1.05368	X	X		chr6:146864926-146874931	chr6:146865949-146874699
SH3BP4	0.984119	X	X		chr2:235860734-235879637	chr2:235862051-235879447
SIK2	0.78587	X	X		chr11:111561777-111579031	chr11:111562916-111579085
SASH1	0.754165	X	X		chr6:148812309-148873193	chr6:148812462-148840706
PAX3	0.550574	X	X		chr2:223102603-223156901	chr2:223102642-223138124
SOX10	0.517108	X	X		chr22:38364339-38388517; chr22:38411613-38436502	chr22:38376743-38383884; chr22:38411590-38447264
LMNA	1.00235		X			chr1:156090421-156111618
MEF2C	1.45323	X			chr5:88108156-88132702
LMLN	0.841849	X			chr3:197679908-197698723
RAPGEF2	0.601949	X			chr4:160148914-160194785
TRPM1	0.523731	X			chr15:31373004-31396510
SLC2A1	0.516033	X			chr1:43415052-43427874
ADRBK2	0.446958	X			chr22:26063655-26072404
DSTYK	0.430783	X			chr1:205151307-205192739
LYST	-0.257619	X			chr1:236021719-236046958; chr1:236079420-236100970
USP48	-0.301486	X			chr1:22023168-22036391
MKLN1	-0.36733	X			chr7:130740441-130766949
STX17	-0.457501	X			chr9:102709818-102736783
USP53	-0.466128	X			chr4:120125724-120155507
PRKAR1A	-0.533971	X			chr17:66444858-66472180
SLC31A1	-0.678042	X			chr9:115972711-115996237
SEMA4C	-0.956339	X			chr2:97531317-97543221
ATOX1	-1.42939	X			chr5:151096782-151138146
SLC7A11	-2.26808	X			chr4:139136509-139165797

## Sheet: Table S7
Table S7. GWAS loci associated with pigmentation and/or melanoma phenotypes that overlap with H3K27ac regions and/or with SOX10 binding sites.
Overlapping SNPs	Phenotype(s)	Predicted / nearest gene(s)	DMSO H3K27ac enhancer region	AZD H3K27ac enhancer region	H3K27ac loss region	H3K27ac gain region	DMSO H3K27ac Super-enhancer	AZD HeK27ac Super-enhancer	DMSO SOX10 ChIP	AZD SOX10 ChIP
rs16886790	Hair color	HDGFL1	X	X	X		X	X		X
rs1042602	Blonde vs. brown-black hair, freckles, hair color, skin pigmentation; brown vs. black hair	TYR	X	X	X		X	X
rs12618491	Blonde vs. brown-black hair	PAX3	X	X	X		X	X
rs1408799	Eye color	RNU2-47P, TYRP1	X	X	X		X	X
rs259035	Blonde vs. brown-black hair, hair color	ZFYVE16	X	X	X		X	X
rs2675345	Skin pigmentation	AC092078.2, SLC24A5	X	X	X		X	X
rs4896038	Blonde vs. brown-black hair	SGK1	X	X	X		X	X
rs71508903	Vitiligo	ARID5B	X	X	X		X	X
rs738322	Nevus	MAFF	X	X	X		X	X
rs1026872	Blonde vs. brown-black hair	ARHGAP24	X	X	X		X
rs1026873	Hair color	ARHGAP24	X	X	X		X
rs10954300	Blonde vs. brown-black hair	LINC-PINT, MKLN1	X	X	X		X
rs5792809	Hair color	GAB2	X	X	X		X
rs6007506	Suntan	KIAA0930	X	X	X		X
rs3804772	Blonde vs. brown-black hair	ATP1B3	X	X	X					X
rs11021232	Vitiligo	AP000820.1, AP001790.1	X	X	X
rs11680860	Blonde vs. brown-black hair	FLJ31356, FOSL2	X	X	X
rs2304206	Vitiligo	IRF3, BCL2L12	X	X	X
rs17184180	Hair color measurement	SLC24A4	X	X		X
rs2233173	Hair color	MLANA	X	X			X
rs7495174	Hair color	OCA2	X	X			X
rs4869723	Blonde vs. brown-black hair, hair color	AKAP12	X	X						X
rs10200159	Vitiligo	SMEK2	X	X
rs12913832	Hair color, suntan	HERC2/OCA2	X	X
rs12702237	Hair color	TNS3	X		X		X	X
rs1432262	Blonde vs. brown-black hair	EPHA4	X		X		X	X
rs9949121	Hair color	SETBP1	X		X		X	X
rs13082190	Hair color	CHL1	X		X		X
rs3213661	Blonde vs. brown-black hair	ETV1	X		X		X
rs3801108	Hair color	ETV1	X		X		X
rs9809528	Blonde vs. brown-black hair	CHL1	X		X		X
rs2111398	Cutaneous melanoma	EMP1, HEBP1, HTR7P1, GPRC5A	X		X			X		X
rs10810635	Freckles	BNC2	X		X
rs10962599	Blonde vs. brown-black hair	BNC2	X		X
rs11649211	Suntan	DEF8	X		X
rs11806180	Blonde vs. brown-black hair, hair color	CDC42BPA	X		X
rs11862382	Conditional red hair	TUBB3, SPIRE2	X		X
rs1204552	Suntan	AL035420.3, NORAD	X		X
rs1436502	Hair color	RPL34-AS1	X		X
rs2153271	Freckles	BNC2	X		X
rs2995264	Melanoma, cutaneous melanoma	STN1	X		X
rs301807	Vitiligo	RERE, AL096855.1	X		X
rs35225290	Brown vs. black hair	ZBTB38	X		X
rs4807000	Vitiligo	TICAM1, AC027319.1	X		X
rs4900109	Eye measurement	SLC24A4	X		X
rs58604758	Blonde vs. brown-black hair	LGR4	X		X
rs62075722	Brown vs. black hair	TSPAN10	X		X
rs71443018	Hair color	FOSL2	X		X
rs72763726	Eye color	AC008885.2, AC026782.2	X		X
rs72917317	Blonde vs. brown-black hair, hair color, suntan, freckles, skin pigmentation	TPCN2	X		X
rs74791047	Suntan	AP001109.1	X		X
rs7672648	Hair color	RPL34-AS1	X		X
rs78037977	Vitiligo	FASLG, SLC25A38P1	X		X
rs9939914	Blonde vs. brown-black hair, brown vs. black hair	SPIRE2	X		X
rs61219147	Hair color	IL16	X				X	X
rs228437	Melanoma	AL078590.3	X				X
rs35412	Skin pigmentation	SLC45A2	X				X
rs73220980	Blonde vs. brown-black hair	LINC00322, SIK1, CRYAA	X					X
rs12203592	Eye color, hair color, suntan, sunburn, skin pigmentation, freckles, vitiligo	IRF4	X						X	X
rs2529369	Blonde vs. brown-black hair, hair color	CDHR3, ATXN7L1	X							X
rs10873172	Blonde vs. brown-black hair	SYNE2	X
rs11649211	Suntan	AF3Gl1P/DEF8	X
rs117417690	Suntan	TUBB4Q/PRDM7	X
rs12210050	Suntan	EXOC2/IRF4	X
rs1887103	Blonde vs. brown-black hair	PPM1A	X
rs535209331	Blonde vs. brown-black hair	HOXC13	X
rs755107	Skin pigmentation	RPRD1B	X
rs9922277	Suntan	TUBB4Q/PRDM7	X
rs67093094	Blonde vs. brown-black hair	IL6		X				X
rs1448489	Brown vs. black hair	OCA2		X
rs2369633	Blonde vs. brown-black hair, hair color	DSTYK, TMCC2			X		X
rs10876864	Vitiligo	RPS26, SUOX			X
rs17093831	Suntan	TM9SF4			X
rs12618431	Blonde vs. brown-black hair	PAX3					X	X
rs1834640	Skin pigmentation	AC092078.2, SLC24A5					X	X
rs2292572	Blonde vs. brown-black hair, brown vs. black hair	GAB2					X	X
rs28648707	Brown vs. black hair	IL16					X	X
rs10169459	Blonde vs. brown-black hair, hair color	EPHA4					X
rs10815302	Blonde vs. brown-black hair	KIAA2026					X
rs12706959	Hair color	MKLN1					X
rs1279403	Hair color	EDNRB					X
rs12806763	Blonde vs. brown-black hair	CCND1, MYEOV					X
rs2025905	Hair color	RAB20					X
rs2294196	Blonde vs. brown-black hair	KIAA0930					X
rs4731742	Cutaneous melanoma	AC016831.7,LINC-PINT					X
rs498136	Melanoma, cutaneous melanoma, freckles, hair color, skin pigmentation	CCND1, LINC01488					X
rs62471615	Hair color	MKLN1					X
rs73262807	Hair color	CREM					X
rs750192	Blonde vs. brown-black hair	EDNRB, SLAIN1					X
rs17833789	blonde.v.brown-black hair, freckles	AKAP1, MSI2								X
